# Supplementary material for: Large-Scale Plasma Analysis Revealed New Mechanisms and Molecules Associated with the Host Response to SARS-CoV-2
Source: Int J Mol Sci. 2020 Nov 16;21(22):8623. doi: 10.3390/ijms21228623 (PMC7696386; doi:10.3390/ijms21228623)
Supplement: Supplementary file 1 [file ijms-21-08623-s001.zip]

Archive with 6 entries (6 files):
- supplementary material.doc
- supplementary material.pdf
- table S1.xlsx
- table S2.xlsx
- table S3.xlsx
- table S4.xlsx
