# Supplementary material for: Large-Scale Plasma Analysis Revealed New Mechanisms and Molecules Associated with the Host Response to SARS-CoV-2
Source: Int J Mol Sci. 2020 Nov 16;21(22):8623. doi: 10.3390/ijms21228623 (PMC7696386; doi:10.3390/ijms21228623)
Supplement: Supplementary file 1 [file ijms-21-08623-s001.zip › table S1.xlsx]

## Sheet: Legend
	Identified ESI +	=	identified lipid species in positive mode
	Identified ESI -	=	identified lipid species in negative mode
	Quantified ESI +	=	concentration of lipid species in each sample (positive mode)
	Quantified ESI -	=	concentration of lipid species in each sample (negative mode)
	mod. COVID-19 vs HEALTHY_ +	=	modulated lipids for COVID-19 vs HEALTHY comparison (positive mode)
	mod. ICU COVID-19 vs ICU_+	=	modulated lipids for ICU COVID-19 vs ICU comparison (positive mode)
	mod. COVID-19 vs HEALTHY_ -	=	modulated lipids for COVID-19 vs HEALTHY comparison (negative mode)
	mod. ICU COVID-19 vs ICU_ -	=	modulated lipids for ICU COVID-19 vs ICU comparison (negative mode)
	mod. COVID-19 vs ICU COVID-19_ +	=	modulated lipids for COVID-19 vs ICU COVID-19 comparison (positive mode)
	mod. COVID-19 vs ICU COVID-19_ -	=	modulated lipids for COVID-19 vs ICU COVID-19 comparison (negative mode)
	Lipids were considered modulated with a fold change > 1.5 and p-value < 0.05

## Sheet: Identified ESI+
Total lipids annotated with MS/MS match in the LipidBlast Library: 469
Metabolite name	Average Rt(min)	Average m/z	Adduct type	Standard use for relative quantification	legend
15:0-18:1(d7) LPC; [M+H]+	4.533	529.399	[M+H]+	Internal standard	LPC
15:0-18:1(d7) LPE; [M+H]+	4.397	487.351	[M+H]+	Internal standard	LPE
15:0-18:1(d7) PC; [M+H]+	12.33	753.614	[M+H]+	Internal standard	PC
15:0-18:1(d7) PE; [M+H]+	11.471	711.566	[M+H]+	Internal standard	PE
15:0-18:1(d7)-15:0 TAG; [M+NH4]+	20.427	829.799	[M+H]+	Internal standard	TAG
Cholesterol (d7); [M-H2O+H]+	9.305	376.395	[M+H]+	Internal standard	Chol
CUDA; [M+H]+	1.975	341.281	[M+H]+	Internal standard	CUDA
d18:1-18:1(d9) SM; [M+H]+	11.322	738.648	[M+H]+	Internal standard	SM
CAR 10:0	1.775	316.248	[M]+	LPC
CAR 10:1	1.637	314.232	[M]+	LPC
CAR 11:1	1.739	328.248	[M]+	LPC
CAR 12:0	2.221	344.279	[M]+	LPC
CAR 13:1	2.124	356.279	[M]+	LPC
CAR 14:0	3.101	372.31	[M]+	LPC
CAR 14:1	2.496	370.296	[M]+	LPC
CAR 14:2	2.055	368.28	[M]+	LPC
CAR 16:0	4.244	400.343	[M]+	LPC
CAR 16:1	3.289	398.326	[M]+	LPC
CAR 18:0	5.318	428.373	[M]+	LPC
CAR 18:1	4.398	426.357	[M]+	LPC
CAR 18:2	3.52	424.341	[M]+	LPC
CAR 20:1	5.389	454.389	[M]+	LPC
CAR 20:2	4.633	452.373	[M]+	LPC
CAR 20:3	4.309	450.359	[M]+	LPC
CAR 20:4	3.347	448.342	[M]+	LPC
CAR 6:0	1.348	260.186	[M]+	LPC
CAR 8:0	1.536	288.217	[M]+	LPC
CAR 8:1	1.47	286.201	[M]+	LPC
CAR 9:0	1.684	302.232	[M]+	LPC
CE 16:0	20.795	642.616	[M+NH4]+	TAG
CE 18:1	20.805	668.633	[M+NH4]+	TAG
CE 18:2	20.246	666.618	[M+NH4]+	TAG
CE 18:3	19.671	664.602	[M+NH4]+	TAG
CE 20:3	20.314	692.634	[M+NH4]+	TAG
CE 20:4	19.857	690.618	[M+NH4]+	TAG
CE 20:5	19.179	688.602	[M+NH4]+	TAG
CE 22:5	19.831	716.632	[M+NH4]+	TAG
CE 22:6	19.466	714.617	[M+NH4]+	TAG
CE 24:6	9.892	742.653	[M+NH4]+	TAG
CE 26:6	9.394	770.681	[M+NH4]+	TAG
DG 17:0	27.796	381.252	[M+Na]+	LPC
DG 24:3	6.551	473.319	[M+Na]+	LPC
DG 25:0	9.868	493.389	[M+Na]+	LPC
DG 25:1	5.353	491.374	[M+Na]+	LPC
DG 26:1	6.122	505.389	[M+Na]+	LPC
DG 28:2	8.684	531.407	[M+Na]+	LPC
DG 30:3	5.225	557.413	[M+Na]+	LPC
DG 30:5	8.683	553.39	[M+Na]+	LPC
DG 30:6	4.538	551.38	[M+Na]+	LPC
DG 31:3	5.977	571.427	[M+Na]+	LPC
DG 32:0	14.547	591.496	[M+Na]+	LPC
DG 34:0	16.397	619.526	[M+Na]+	LPC
DG 34:1	14.638	617.51	[M+Na]+	LPC
DG 34:1|DG 16:0_18:1	14.694	612.555	[M+NH4]+	LPC
DG 34:2	13.187	615.495	[M+Na]+	LPC
DG 35:5	5.149	623.452	[M+Na]+	LPC
DG 36:1	16.197	645.544	[M+Na]+	LPC
DG 36:1|DG 18:0_18:1	16.115	640.587	[M+NH4]+	LPC
DG 36:2	14.764	643.526	[M+Na]+	LPC
DG 36:2|DG 18:1_18:1	14.779	638.571	[M+NH4]+	LPC
DG 36:3|DG 18:1_18:2	13.26	636.554	[M+NH4]+	LPC
DG 36:4|DG 18:2_18:2	11.809	634.541	[M+NH4]+	LPC
DG 36:5	5.838	637.466	[M+Na]+	LPC
DG 37:7	15.714	647.459	[M+Na]+	LPC
DG 38:10	4.276	655.418	[M+Na]+	LPC
DG 38:2	20.226	671.575	[M+Na]+	LPC
DG 38:3	19.671	669.556	[M+Na]+	LPC
DG 38:5|DG 18:1_20:4	12.723	660.558	[M+NH4]+	LPC
DG 38:6|DG 18:2_20:4	11.337	658.538	[M+NH4]+	LPC
DG 40:2	17.673	699.597	[M+Na]+	LPC
DG 40:3	20.252	697.591	[M+Na]+	LPC
DG 40:4	19.852	695.572	[M+Na]+	LPC
DG 40:5	19.22	693.556	[M+Na]+	LPC
DG 40:6	5.27	691.527	[M+Na]+	LPC
DG 40:6|DG 16:0_24:6	5.26	686.574	[M+NH4]+	LPC
DG 40:8|DG 18:2_22:6	12.094	684.555	[M+NH4]+	LPC
DG 41:5	10.875	707.552	[M+Na]+	LPC
DG 41:8	18.282	701.528	[M+Na]+	LPC
DG 42:11|DG 20:5_22:6	9.949	704.523	[M+NH4]+	LPC
DG 44:6|DG 18:0_26:6	6.177	742.638	[M+NH4]+	LPC
DG 50:1|DG 16:0_34:1	21.421	836.804	[M+NH4]+	LPC
DG 52:1|DG 34:0_18:1	21.553	864.834	[M+NH4]+	LPC
DG 52:2|DG 16:0_36:2	20.905	862.813	[M+NH4]+	LPC
LPC 14:0	3.174	490.289	[M+Na]+	LPC
LPC 14:0/0:0	3.226	468.309	[M+H]+	LPC
LPC 15:0	3.85	504.308	[M+Na]+	LPC
LPC 15:0/0:0	3.797	482.325	[M+H]+	LPC
LPC 16:0/0:0	4.397	496.34	[M+H]+	LPC
LPC 16:1/0:0	3.42	494.325	[M+H]+	LPC
LPC 17:0	4.967	510.357	[M+H]+	LPC
LPC 17:1/0:0	3.989	508.34	[M+H]+	LPC
LPC 18:0 [M+H]+ & [M+Na]+	5.0135	524.362	[M+H]+	LPC
LPC 18:0/0:0	5.469	524.371	[M+H]+	LPC
LPC 18:1/0:0	4.561	522.356	[M+H]+	LPC
LPC 18:2/0:0	3.674	520.34	[M+H]+	LPC
LPC 18:3/0:0	4.399	518.321	[M+H]+	LPC
LPC 19:0/0:0	5.999	538.388	[M+H]+	LPC
LPC 19:1/0:0	5.09	536.37	[M+H]+	LPC
LPC 20:1/0:0	5.557	550.386	[M+H]+	LPC
LPC 20:2/0:0	4.784	548.371	[M+H]+	LPC
LPC 20:3/0:0	4.019	546.357	[M+H]+	LPC
LPC 20:4	3.467	566.322	[M+Na]+	LPC
LPC 20:4/0:0	3.468	544.339	[M+H]+	LPC
LPC 20:5/0:0	2.823	542.324	[M+H]+	LPC
LPC 22:4/0:0	4.368	572.371	[M+H]+	LPC
LPC 22:5/0:0	3.644	570.354	[M+H]+	LPC
LPC 22:6	3.243	590.32	[M+Na]+	LPC
LPC 22:6/0:0	3.233	568.341	[M+H]+	LPC
LPC 24:0/0:0	9.413	608.466	[M+H]+	LPC
LPC 26:0/0:0	11.104	636.497	[M+H]+	LPC
LPC O-16:0	5.123	482.36	[M+H]+	LPC
LPC O-16:1	4.875	480.345	[M+H]+	LPC
LPC O-18:0	6.28	510.393	[M+H]+	LPC
LPC O-18:1	5.222	508.376	[M+H]+	LPC
LPC O-18:2	5.104	506.36	[M+H]+	LPC
LPC O-24:1	9.259	592.471	[M+H]+	LPC
LPE 16:0	4.231	454.292	[M+H]+	LPE
LPE 18:0	5.253	482.324	[M+H]+	LPE
LPE 18:1	4.415	480.309	[M+H]+	LPE
LPE 18:2	3.529	478.293	[M+H]+	LPE
LPE 20:4	3.357	502.294	[M+H]+	LPE
LPE 20:5	3.532	500.275	[M+H]+	LPE
LPE 22:4	4.214	530.323	[M+H]+	LPE
LPE 22:5	3.616	528.307	[M+H]+	LPE
LPE 22:6	3.133	526.294	[M+H]+	LPE
LPE O-16:1	4.672	438.297	[M+H]+	LPE
LPE O-18:1	5.634	466.328	[M+H]+	LPE
LPE O-18:2	4.818	464.313	[M+H]+	LPE
MG 15:1	2.148	332.28	[M+NH4]+	LPE
MG 17:1	2.153	360.311	[M+NH4]+	LPE
MG 21:1	6.263	416.373	[M+NH4]+	LPE
NAE 14:0	2.122	272.258	[M+H]+	LPE
NAE 14:1	5.377	270.243	[M+H]+	LPE
NAE 16:0	3.34	300.29	[M+H]+	LPE
NAE 16:2	1.313	296.258	[M+H]+	LPE
NAE 18:1	5.361	326.305	[M+H]+	LPE
NAE 18:2	3.62	324.29	[M+H]+	LPE
NAE 20:0	3.809	356.352	[M+H]+	LPE
NAE 20:1	6.468	354.337	[M+H]+	LPE
NAE 20:2	4.271	352.32	[M+H]+	LPE
NAE 20:4	2.961	348.29	[M+H]+	LPE
NAE 20:5	2.691	346.274	[M+H]+	LPE
NAE 22:4	4.985	376.318	[M+H]+	LPE
NAE 22:5	4.271	374.302	[M+H]+	LPE
PC 30:0	11.392	728.52	[M+Na]+	PC
PC 30:0|PC 14:0_16:0	11.406	706.536	[M+H]+	PC
PC 32:0|PC 16:0_16:0	13.156	734.567	[M+H]+	PC
PC 32:1	11.44	754.536	[M+Na]+	PC
PC 32:1|PC 16:0_16:1	11.455	732.555	[M+H]+	PC
PC 32:2|PC 14:0_18:2	10.188	730.539	[M+H]+	PC
PC 33:0|PC 16:0_17:0	13.999	748.582	[M+H]+	PC
PC 34:0|PC 16:0_18:0	15.322	762.602	[M+H]+	PC
PC 34:1|PC 16:0_18:1	9.304	760.583	[M+H]+	PC
PC 34:2	5.04	758.56	[M+H]+	PC
PC 34:2|PC 16:0_18:2	11.625	758.569	[M+H]+	PC
PC 34:3	10.522	778.538	[M+Na]+	PC
PC 34:3|PC 16:1_18:2	10.519	756.555	[M+H]+	PC
PC 34:4|PC 14:0_20:4	9.699	754.537	[M+H]+	PC
PC 35:1|PC 17:0_18:1	14.387	774.602	[M+H]+	PC
PC 35:3|PC 17:1_18:2	11.853	770.569	[M+H]+	PC
PC 35:4	12.217	790.532	[M+Na]+	PC
PC 35:4|PC 15:0_20:4	10.474	768.553	[M+H]+	PC
PC 36:1|PC 18:0_18:1	15.309	788.617	[M+H]+	PC
PC 36:2	9.402	786.599	[M+H]+	PC
PC 36:2|PC 18:0_18:2	13.543	786.6	[M+H]+	PC
PC 36:3|PC 18:0_18:3	15.278	784.586	[M+H]+	PC
PC 36:3|PC 18:1_18:2	12.062	784.584	[M+H]+	PC
PC 36:4	11.127	804.552	[M+Na]+	PC
PC 36:4|PC 16:0_20:4	11.14	782.567	[M+H]+	PC
PC 36:4|PC 18:2_18:2	11.14	782.568	[M+H]+	PC
PC 36:5	10.089	802.537	[M+Na]+	PC
PC 36:5|PC 16:0_20:5	10.118	780.552	[M+H]+	PC
PC 36:6|PC 14:0_22:6	9.269	778.537	[M+H]+	PC
PC 37:2|PC 19:0_18:2	14.739	800.615	[M+H]+	PC
PC 37:3|PC 17:0_20:3	12.95	798.599	[M+H]+	PC
PC 37:4|PC 17:0_20:4	12.046	796.585	[M+H]+	PC
PC 37:6	9.922	792.551	[M+H]+	PC
PC 38:1|PC 18:0_20:1	17.049	816.644	[M+H]+	PC
PC 38:2|PC 18:0_20:2	14.142	814.624	[M+H]+	PC
PC 38:3|PC 18:0_20:3	14.019	812.615	[M+H]+	PC
PC 38:4	12.922	832.58	[M+Na]+	PC
PC 38:4|PC 18:0_20:4	12.924	810.599	[M+H]+	PC
PC 38:5|PC 16:0_22:5	11.183	808.583	[M+H]+	PC
PC 38:5|PC 18:0_20:5	11.207	808.582	[M+H]+	PC
PC 38:6	10.631	828.55	[M+Na]+	PC
PC 38:6|PC 16:0_22:6	10.618	806.569	[M+H]+	PC
PC 38:7|PC 16:1_22:6	9.472	804.551	[M+H]+	PC
PC 39:5	12.08	822.6	[M+H]+	PC
PC 39:6|PC 17:0_22:6	11.358	820.585	[M+H]+	PC
PC 39:7|PC 17:1_22:6	12.063	818.563	[M+H]+	PC
PC 40:4	14.553	860.611	[M+Na]+	PC
PC 40:4|PC 18:0_22:4	14.555	838.631	[M+H]+	PC
PC 40:5	12.929	858.597	[M+Na]+	PC
PC 40:5|PC 18:0_22:5	12.926	836.616	[M+H]+	PC
PC 40:6	12.331	856.58	[M+Na]+	PC
PC 40:6|PC 18:0_22:6	12.306	834.601	[M+H]+	PC
PC 40:7	10.397	854.565	[M+Na]+	PC
PC 40:7|PC 18:1_22:6	11.938	832.587	[M+H]+	PC
PC 40:8|PC 20:4_20:4	9.452	830.57	[M+H]+	PC
PC 42:7	12.25	860.616	[M+H]+	PC
PC 42:9	9.703	856.583	[M+H]+	PC
PC O-21:3	2.04	560.381	[M+H]+	PC
PC O-29:0	10.405	678.567	[M+H]+	PC
PC O-30:0	12.998	692.56	[M+H]+	PC
PC O-32:0	15.224	720.588	[M+H]+	PC
PC O-32:1	14.708	718.573	[M+H]+	PC
PC O-32:2	12.667	716.558	[M+H]+	PC
PC O-34:0	17.073	748.621	[M+H]+	PC
PC O-34:1	15.18	746.604	[M+H]+	PC
PC O-34:2	13.467	744.591	[M+H]+	PC
PC O-34:3	15.231	742.572	[M+H]+	PC
PC O-36:1	16.995	774.637	[M+H]+	PC
PC O-36:3	13.152	770.606	[M+H]+	PC
PC O-36:4	12.707	768.59	[M+H]+	PC
PC O-36:5	12.124	766.574	[M+H]+	PC
PC O-36:6	12.834	764.554	[M+H]+	PC
PC O-36:9	4.97	758.521	[M+H]+	PC
PC O-38:4	14.78	796.622	[M+H]+	PC
PC O-38:5	12.687	794.607	[M+H]+	PC
PC O-38:6	12.104	792.591	[M+H]+	PC
PC O-38:7	11.519	790.574	[M+H]+	PC
PC O-38:8	12.138	788.556	[M+H]+	PC
PC O-39:4	12.926	810.626	[M+H]+	PC
PC O-40:4	16.717	824.651	[M+H]+	PC
PC O-40:5	14.737	822.637	[M+H]+	PC
PC O-40:6	12.921	820.623	[M+H]+	PC
PC O-40:7	11.893	818.607	[M+H]+	PC
PC O-40:8	11.411	816.588	[M+H]+	PC
PC O-42:10	11.999	840.589	[M+H]+	PC
PC O-42:4	18.316	852.685	[M+H]+	PC
PC O-42:6	15.285	848.65	[M+H]+	PC
PC O-42:7	13.827	846.636	[M+H]+	PC
PC O-44:4	18.872	880.717	[M+H]+	PC
PC O-44:5	18.254	878.701	[M+H]+	PC
PC O-44:6	16.782	876.685	[M+H]+	PC
PC O-44:7	16.027	874.67	[M+H]+	PC
PC O-44:8	16.742	872.65	[M+H]+	PC
PC O-46:4	18.879	908.746	[M+H]+	PC
PC O-46:7	17.583	902.702	[M+H]+	PC
PE 34:0|PE 17:0_17:0	12.34	720.551	[M+H]+	PE
PE 34:1|PE 16:0_18:1	12.377	718.538	[M+H]+	PE
PE 34:2|PE 16:0_18:2	10.994	716.523	[M+H]+	PE
PE 34:3|PE 16:0_18:3	5.106	714.495	[M+H]+	PE
PE 36:1|PE 18:0_18:1	14.069	746.57	[M+H]+	PE
PE 36:2|PE 18:0_18:2	10.972	744.552	[M+H]+	PE
PE 36:2|PE 18:1_18:1	12.625	744.552	[M+H]+	PE
PE 36:3|PE 18:1_18:2	11.157	742.54	[M+H]+	PE
PE 36:4	10.616	762.505	[M+Na]+	PE
PE 36:4|PE 18:2_18:2	10.621	740.523	[M+H]+	PE
PE 37:6	9.382	750.505	[M+H]+	PE
PE 38:5	10.718	788.52	[M+Na]+	PE
PE 38:5|PE 16:0_22:5	10.717	766.537	[M+H]+	PE
PE 38:5|PE 18:1_20:4	10.721	766.539	[M+H]+	PE
PE 38:6	10.094	786.5	[M+Na]+	PE
PE 38:6|PE 16:0_22:6	10.05	764.525	[M+H]+	PE
PE 40:6|PE 18:0_22:6	11.53	792.55	[M+H]+	PE
PE 40:7	11.42	812.515	[M+Na]+	PE
PE P-34:1|PE P-16:0_18:1	13.362	702.543	[M+H]+	PE
PE P-34:2|PE P-16:0_18:2	11.883	700.528	[M+H]+	PE
PE P-36:1|PE P-18:0_18:1	15.081	730.576	[M+H]+	PE
PE P-36:2|PE P-18:0_18:2	13.6	728.561	[M+H]+	PE
PE P-36:4|PE P-16:0_20:4	11.609	724.525	[M+H]+	PE
PE P-36:5|PE P-16:0_20:5	11.031	722.51	[M+H]+	PE
PE P-38:2|PE P-20:0_18:2	15.347	756.592	[M+H]+	PE
PE P-38:4|PE P-18:0_20:4	13.122	752.556	[M+H]+	PE
PE P-38:5|PE P-18:1_20:4	11.531	750.543	[M+H]+	PE
PE P-38:6|PE P-16:0_22:6	10.817	748.528	[M+H]+	PE
PE P-40:4|PE P-18:0_22:4	14.872	780.591	[M+H]+	PE
PE P-40:5|PE P-18:0_22:5	13.005	778.575	[M+H]+	PE
PE P-40:5|PE P-20:0_20:5	13.003	778.574	[M+H]+	PE
PE P-40:6|PE P-18:0_22:6	12.435	776.559	[M+H]+	PE
PE P-40:7|PE P-18:1_22:6	10.916	774.541	[M+H]+	PE
PI 32:1	9.164	826.544	[M+NH4]+	SM
PI 34:1	10.452	854.577	[M+NH4]+	SM
PI 34:2	9.316	852.558	[M+NH4]+	SM
PI 36:1	11.812	882.606	[M+NH4]+	SM
PI 36:2	10.642	880.591	[M+NH4]+	SM
PI 36:3	9.428	878.574	[M+NH4]+	SM
PI 36:4	9.007	876.558	[M+NH4]+	SM
PI 38:3	10.54	906.607	[M+NH4]+	SM
PI 38:4	10.337	904.591	[M+NH4]+	SM
PI 38:5	9.193	902.574	[M+NH4]+	SM
PI 38:6	8.579	900.56	[M+NH4]+	SM
PI 40:4	10.366	932.625	[M+NH4]+	SM
PI 40:6	9.84	928.592	[M+NH4]+	SM
SM 28:1;2O|SM 18:1;2O/10:0	7.009	619.48	[M+H]+	SM
SM 30:1;2O|SM 16:1;2O/14:0	8.368	647.513	[M+H]+	SM
SM 31:1;2O|SM 17:1;2O/14:0	9.223	661.529	[M+H]+	SM
SM 32:0;2O	10.493	677.56	[M+H]+	SM
SM 32:1;2O	9.834	697.526	[M+Na]+	SM
SM 32:1;2O|SM 16:1;2O/16:0	9.815	675.544	[M+H]+	SM
SM 32:1;3O	9.287	691.537	[M+H]+	SM
SM 32:5;2O	5.059	667.478	[M+H]+	SM
SM 33:1;2O|SM 17:1;2O/16:0	10.618	689.557	[M+H]+	SM
SM 33:2;2O|SM 17:2;2O/16:0	9.312	687.545	[M+H]+	SM
SM 33:2;3O	11.34	703.551	[M+H]+	SM
SM 34:0;2O	11.939	727.572	[M+Na]+	SM
SM 34:0;3O	10.524	721.587	[M+H]+	SM
SM 34:1;2O	11.36	725.558	[M+Na]+	SM
SM 34:1;2O|SM 18:1;2O/16:0	11.328	703.573	[M+H]+	SM
SM 34:1;3O	11.465	719.571	[M+H]+	SM
SM 34:2;2O	9.911	723.542	[M+Na]+	SM
SM 34:2;2O|SM 18:2;2O/16:0	9.918	701.559	[M+H]+	SM
SM 34:2;3O	9.364	717.553	[M+H]+	SM
SM 34:7;3O	11.622	707.49	[M+H]+	SM
SM 35:1;2O|SM 19:1;2O/16:0	12.306	717.59	[M+H]+	SM
SM 35:2;2O|SM 21:1;2O/14:1	10.695	715.574	[M+H]+	SM
SM 36:0;2O	13.204	733.62	[M+H]+	SM
SM 36:1;2O|SM 18:1;2O/18:0	13.133	731.606	[M+H]+	SM
SM 36:1;3O	10.135	747.611	[M+H]+	SM
SM 36:2;2O	11.412	751.573	[M+Na]+	SM
SM 36:2;2O|SM 18:2;2O/18:0	11.429	729.589	[M+H]+	SM
SM 36:3;2O|SM 18:1;2O/18:2	10.416	727.574	[M+H]+	SM
SM 37:2;2O|SM 18:1;2O/19:1	12.418	743.605	[M+H]+	SM
SM 37:2;3O	10.209	759.592	[M+H]+	SM
SM 37:6;2O	19.434	735.545	[M+H]+	SM
SM 38:1;2O	15.233	781.616	[M+Na]+	SM
SM 38:1;2O|SM 16:1;2O/22:0	15.239	759.635	[M+H]+	SM
SM 38:1;3O	9.393	775.636	[M+H]+	SM
SM 38:2;2O	13.297	779.605	[M+Na]+	SM
SM 38:2;2O|SM 18:2;2O/20:0	13.219	757.619	[M+H]+	SM
SM 39:1;2O|SM 17:1;2O/22:0	16.312	773.653	[M+H]+	SM
SM 39:2;2O|SM 18:2;2O/21:0	14.599	771.635	[M+H]+	SM
SM 39:6;2O	13.178	763.584	[M+H]+	SM
SM 40:1;2O	16.967	809.65	[M+Na]+	SM
SM 40:1;2O|SM 18:1;2O/22:0	16.947	787.67	[M+H]+	SM
SM 40:2;2O	15.279	807.633	[M+Na]+	SM
SM 40:2;2O|SM 18:2;2O/22:0	15.281	785.654	[M+H]+	SM
SM 40:3;2O|SM 18:0;2O/22:3	13.321	783.637	[M+H]+	SM
SM 40:4;2O|SM 18:1;2O/22:3	11.568	781.614	[M+H]+	SM
SM 40:7;2O	12.363	775.595	[M+H]+	SM
SM 41:1;2O|SM 18:1;2O/23:0	17.871	801.684	[M+H]+	SM
SM 41:2;2O|SM 17:1;2O/24:1	16.324	799.666	[M+H]+	SM
SM 41:2;3O	19.901	815.651	[M+H]+	SM
SM 41:3;3O	19.32	813.639	[M+H]+	SM
SM 41:8;2O	13.539	787.58	[M+H]+	SM
SM 42:1;2O|SM 18:1;2O/24:0	16.879	815.699	[M+H]+	SM
SM 42:1;3O	16.06	831.692	[M+H]+	SM
SM 42:2;2O	16.875	835.664	[M+Na]+	SM
SM 42:2;2O|SM 18:1;2O/24:1	16.879	813.683	[M+H]+	SM
SM 42:3;2O	15.272	833.65	[M+Na]+	SM
SM 42:3;2O|SM 18:2;2O/24:1	15.271	811.666	[M+H]+	SM
SM 42:4;2O	13.601	831.633	[M+Na]+	SM
SM 42:4;2O|SM 18:2;2O/24:2	13.445	809.65	[M+H]+	SM
SM 42:4;3O	16.713	825.657	[M+H]+	SM
SM 42:5;2O|SM 18:1;2O/24:4	12.278	807.635	[M+H]+	SM
SM 43:2;3O	20.43	843.684	[M+H]+	SM
SM 44:2;3O	20.697	857.697	[M+H]+	SM
SM 44:3;2O|SM 18:1;2O/26:2	16.982	839.702	[M+H]+	SM
SM 44:9;3O	12.398	843.583	[M+H]+	SM
SM 46:4;3O	20.244	881.699	[M+H]+	SM
SM 46:5;3O	19.716	879.685	[M+H]+	SM
TG 36:3|TG 8:0_10:0_18:3	10.745	650.536	[M+NH4]+	TAG
TG 38:1|TG 10:0_10:0_18:1	20.228	687.552	[M+Na]+	TAG
TG 42:0|TG 12:0_14:0_16:0 [M+NH4]+ & [M+Na]+	19.233	740.675	[M+NH4]+	TAG
TG 42:3|TG 8:0_16:1_18:2	12.342	739.586	[M+NH4]+	TAG
TG 43:0|TG 12:0_15:0_16:0	19.541	754.69	[M+NH4]+	TAG
TG 44:0|TG 10:0_16:0_18:0 [M+NH4]+ & [M+Na]+	19.889	768.708	[M+NH4]+	TAG
TG 44:1|TG 10:0_16:0_18:1 [M+NH4]+ & [M+Na]+	19.281	771.645	[M+NH4]+	TAG
TG 44:2|TG 10:0_16:1_18:1	18.628	764.675	[M+NH4]+	TAG
TG 45:0|TG 14:0_15:0_16:0	20.155	782.723	[M+NH4]+	TAG
TG 45:1|TG 12:0_15:0_18:1	19.627	780.705	[M+NH4]+	TAG
TG 45:1|TG 14:0_15:0_16:1	19.636	785.663	[M+Na]+	TAG
TG 45:2|TG 10:0_17:1_18:1	19.115	778.694	[M+NH4]+	TAG
TG 46:0|TG 12:0_16:0_18:0	20.368	801.692	[M+Na]+	TAG
TG 46:0|TG 14:0_16:0_16:0	20.436	796.739	[M+NH4]+	TAG
TG 46:1|TG 14:0_16:0_16:1 [M+NH4]+ & [M+Na]+	19.915	794.724	[M+NH4]+	TAG
TG 46:2|TG 12:0_16:1_18:1 [M+NH4]+ & [M+Na]+	19.338	792.71	[M+NH4]+	TAG
TG 46:3|TG 10:0_18:1_18:2	18.675	790.691	[M+NH4]+	TAG
TG 47:0|TG 15:0_16:0_16:0	20.672	810.756	[M+NH4]+	TAG
TG 47:1|TG 14:0_15:0_18:1	20.198	808.739	[M+NH4]+	TAG
TG 47:1|TG 15:0_16:0_16:1	20.189	813.692	[M+Na]+	TAG
TG 47:2|TG 14:0_15:0_18:2	19.704	806.721	[M+NH4]+	TAG
TG 47:2|TG 16:0_15:1_16:1	19.682	811.675	[M+Na]+	TAG
TG 47:3|TG 15:1_16:1_16:1	19.222	804.709	[M+NH4]+	TAG
TG 48:0|TG 14:0_16:0_18:0	20.896	824.769	[M+NH4]+	TAG
TG 48:1|TG 14:0_16:0_18:1 [M+NH4]+ & [M+Na]+	20.45	822.757	[M+NH4]+	TAG
TG 48:2|TG 14:0_16:0_18:2	19.937	820.739	[M+NH4]+	TAG
TG 48:2|TG 14:0_16:1_18:1	19.922	825.695	[M+Na]+	TAG
TG 48:3|TG 14:0_16:1_18:2	19.362	818.724	[M+NH4]+	TAG
TG 48:3|TG 14:1_16:1_18:1	19.357	823.679	[M+Na]+	TAG
TG 48:4|TG 12:0_16:0_20:4	16.329	821.647	[M+Na]+	TAG
TG 49:0|TG 15:0_16:0_18:0	21.072	838.784	[M+NH4]+	TAG
TG 49:0|TG 15:0_16:0_18:0	21.066	843.742	[M+Na]+	TAG
TG 49:1|TG 15:0_16:0_18:1 [M+NH4]+ & [M+Na]+	20.691	836.77	[M+NH4]+	TAG
TG 49:2|TG 15:0_16:0_18:2	20.242	834.753	[M+NH4]+	TAG
TG 49:2|TG 15:0_16:1_18:1	20.209	839.711	[M+Na]+	TAG
TG 49:3|TG 15:0_16:1_18:2 [M+NH4]+ & [M+Na]+	19.706	832.739	[M+NH4]+	TAG
TG 50:0|TG 16:0_16:0_18:0 [M+NH4]+ & [M+Na]+	21.269	852.799	[M+NH4]+	TAG
TG 50:1|TG 16:0_16:0_18:1 [M+NH4]+ & [M+Na]+	20.909	850.784	[M+NH4]+	TAG
TG 50:2|TG 16:0_16:1_18:1 [M+NH4]+ & [M+Na]+	20.466	848.768	[M+NH4]+	TAG
TG 50:3|TG 16:0_16:1_18:2 [M+NH4]+ & [M+Na]+	19.968	846.754	[M+NH4]+	TAG
TG 50:4|TG 16:0_16:1_18:3	19.414	849.695	[M+Na]+	TAG
TG 50:4|TG 16:1_16:1_18:2	19.663	844.737	[M+NH4]+	TAG
TG 50:5|TG 14:0_18:2_18:3	19.009	847.678	[M+Na]+	TAG
TG 51:0|TG 16:0_17:0_18:0 [M+NH4]+ & [M+Na]+	21.084	866.816	[M+NH4]+	TAG
TG 51:1|TG 16:0_17:0_18:1 [M+NH4]+ & [M+Na]+	21.097	869.758	[M+NH4]+	TAG
TG 51:2|TG 16:0_17:1_18:1	20.706	862.787	[M+NH4]+	TAG
TG 51:2|TG 17:0_16:1_18:1	20.714	867.742	[M+Na]+	TAG
TG 51:3|TG 15:0_18:1_18:2 [M+NH4]+ & [M+Na]+	20.246	860.768	[M+NH4]+	TAG
TG 51:4|TG 16:1_17:1_18:2 [M+NH4]+ & [M+Na]+	19.754	858.757	[M+NH4]+	TAG
TG 51:5|TG 15:0_18:2_18:3 [M+NH4]+ & [M+Na]+	19.761	856.738	[M+NH4]+	TAG
TG 52:0|TG 16:0_18:0_18:0 [M+NH4]+ & [M+Na]+	21.564	880.83	[M+NH4]+	TAG
TG 52:1|TG 16:0_18:0_18:1 [M+NH4]+ & [M+Na]+	21.094	878.82	[M+NH4]+	TAG
TG 52:2|TG 16:0_18:1_18:1 [M+NH4]+ & [M+Na]+	20.922	876.802	[M+NH4]+	TAG
TG 52:3|TG 16:0_18:1_18:2 [M+NH4]+ & [M+Na]+	20.501	874.787	[M+NH4]+	TAG
TG 52:4|TG 16:1_18:1_18:2 [M+NH4]+ & [M+Na]+	20.015	872.771	[M+NH4]+	TAG
TG 52:5|TG 16:0_18:2_18:3 [M+NH4]+ & [M+Na]+	19.528	870.751	[M+NH4]+	TAG
TG 52:6|TG 14:1_18:1_20:4	19.152	873.695	[M+Na]+	TAG
TG 52:6|TG 16:1_18:2_18:3	20.713	868.738	[M+NH4]+	TAG
TG 53:0|TG 16:0_18:0_19:0	21.367	894.85	[M+NH4]+	TAG
TG 53:1|TG 17:0_18:0_18:1 [M+NH4]+ & [M+Na]+	21.097	892.834	[M+NH4]+	TAG
TG 53:2|TG 16:0_18:1_19:1	21.107	895.771	[M+Na]+	TAG
TG 53:2|TG 17:0_18:1_18:1	20.854	890.816	[M+NH4]+	TAG
TG 53:3|TG 17:0_18:1_18:2 [M+NH4]+ & [M+Na]+	20.721	888.8	[M+NH4]+	TAG
TG 53:4|TG 17:1_18:1_18:2 [M+NH4]+ & [M+Na]+	20.279	886.786	[M+NH4]+	TAG
TG 53:5|TG 17:1_18:2_18:2	19.939	884.767	[M+NH4]+	TAG
TG 54:0|TG 16:0_18:0_20:0	21.558	908.862	[M+NH4]+	TAG
TG 54:1|TG 16:0_18:0_20:1	21.446	911.806	[M+Na]+	TAG
TG 54:1|TG 18:0_18:0_18:1	21.548	906.846	[M+NH4]+	TAG
TG 54:2|TG 16:0_18:1_20:1	21.285	909.785	[M+Na]+	TAG
TG 54:2|TG 18:0_18:1_18:1	21.278	904.834	[M+NH4]+	TAG
TG 54:3|TG 18:0_18:1_18:2 [M+NH4]+ & [M+Na]+	20.937	902.82	[M+NH4]+	TAG
TG 54:4|TG 16:0_18:1_20:3	20.539	905.756	[M+Na]+	TAG
TG 54:4|TG 18:1_18:1_18:2	20.524	900.8	[M+NH4]+	TAG
TG 54:5|TG 16:0_18:1_20:4	20.277	903.738	[M+Na]+	TAG
TG 54:5|TG 18:1_18:2_18:2	20.131	898.785	[M+NH4]+	TAG
TG 54:6|TG 16:0_18:2_20:4	19.797	901.725	[M+Na]+	TAG
TG 54:6|TG 18:1_18:2_18:3	19.778	896.768	[M+NH4]+	TAG
TG 54:7|TG 16:1_18:2_20:4	19.279	899.707	[M+Na]+	TAG
TG 54:7|TG 18:2_18:2_18:3	19.334	894.754	[M+NH4]+	TAG
TG 55:0|TG 15:0_16:0_24:0	21.801	922.881	[M+NH4]+	TAG
TG 55:1|TG 16:0_21:0_18:1	21.291	920.864	[M+NH4]+	TAG
TG 55:3|TG 19:0_18:1_18:2	19.511	921.798	[M+Na]+	TAG
TG 55:4|TG 18:1_19:1_18:2	20.257	914.817	[M+NH4]+	TAG
TG 55:5|TG 19:1_18:2_18:2	20.571	912.799	[M+NH4]+	TAG
TG 55:6|TG 17:0_18:2_20:4	20.058	910.787	[M+NH4]+	TAG
TG 56:0|TG 16:0_18:0_22:0	22.006	936.893	[M+NH4]+	TAG
TG 56:1|TG 16:0_22:0_18:1 [M+NH4]+ & [M+Na]+	21.697	934.882	[M+NH4]+	TAG
TG 56:2|TG 18:0_18:1_20:1	21.566	937.818	[M+Na]+	TAG
TG 56:3|TG 18:1_18:1_20:1	21.165	930.849	[M+NH4]+	TAG
TG 56:3|TG 20:0_18:1_18:2	21.285	935.806	[M+Na]+	TAG
TG 56:4|TG 18:0_18:1_20:3	20.819	933.787	[M+Na]+	TAG
TG 56:4|TG 18:1_20:1_18:2	20.757	928.833	[M+NH4]+	TAG
TG 56:5|TG 18:0_18:1_20:4 [M+NH4]+ & [M+Na]+	20.755	926.817	[M+NH4]+	TAG
TG 56:6|TG 16:0_18:1_22:5	20.342	924.8	[M+NH4]+	TAG
TG 56:6|TG 18:0_18:2_20:4	20.333	929.755	[M+Na]+	TAG
TG 56:7|TG 16:0_18:1_22:6	19.963	922.787	[M+NH4]+	TAG
TG 56:7|TG 18:1_18:2_20:4	19.948	927.741	[M+Na]+	TAG
TG 56:8|TG 16:0_18:2_22:6 [M+NH4]+ & [M+Na]+	19.511	920.77	[M+NH4]+	TAG
TG 57:0|TG 16:0_17:0_24:0	22.099	950.907	[M+NH4]+	TAG
TG 57:1|TG 16:0_23:0_18:1	21.67	948.893	[M+NH4]+	TAG
TG 57:2|TG 16:0_23:0_18:2	21.287	946.879	[M+NH4]+	TAG
TG 57:8|TG 17:1_18:1_22:6	19.92	938.819	[M+NH4]+	TAG
TG 58:0|TG 16:0_18:0_24:0	20.098	936.798	[M+NH4]+	TAG
TG 58:1|TG 18:0_22:0_18:1	19.8	934.784	[M+NH4]+	TAG
TG 58:10|TG 16:0_20:4_22:6	19.183	944.767	[M+NH4]+	TAG
TG 58:2|TG 16:0_18:1_24:1 [M+NH4]+ & [M+Na]+	21.793	960.899	[M+NH4]+	TAG
TG 58:3|TG 22:0_18:1_18:2 [M+NH4]+ & [M+Na]+	21.366	958.876	[M+NH4]+	TAG
TG 58:4|TG 18:1_22:1_18:2	20.893	956.864	[M+NH4]+	TAG
TG 58:5|TG 18:0_18:1_22:4 [M+NH4]+ & [M+Na]+	20.758	954.847	[M+NH4]+	TAG
TG 58:6|TG 16:0_18:1_24:5	20.722	957.786	[M+Na]+	TAG
TG 58:6|TG 18:0_18:1_22:5	20.567	952.835	[M+NH4]+	TAG
TG 58:7|TG 18:0_18:1_22:6 [M+NH4]+ & [M+Na]+	20.058	950.816	[M+NH4]+	TAG
TG 58:8|TG 18:1_18:2_22:5 [M+NH4]+ & [M+Na]+	20.073	948.798	[M+NH4]+	TAG
TG 58:9|TG 18:1_18:2_22:6 [M+NH4]+ & [M+Na]+	19.565	946.783	[M+NH4]+	TAG
TG 59:2|TG 23:0_18:1_18:1	21.855	974.908	[M+NH4]+	TAG
TG 59:4|TG 23:0_18:2_18:2	21.362	970.878	[M+NH4]+	TAG
TG 60:1|TG 18:0_24:0_18:1	22.105	990.94	[M+NH4]+	TAG
TG 60:10|TG 18:0_20:4_22:6	19.657	972.799	[M+NH4]+	TAG
TG 60:11|TG 18:1_20:4_22:6 [M+NH4]+ & [M+Na]+	19.28	970.787	[M+NH4]+	TAG
TG 60:2|TG 24:0_18:1_18:1	22.017	988.924	[M+NH4]+	TAG
TG 60:4|TG 18:1_24:1_18:2	21.575	984.895	[M+NH4]+	TAG
TG 60:6|TG 22:0_18:1_20:5	20.712	980.862	[M+NH4]+	TAG
TG 60:7|TG 18:1_18:2_24:4	20.65	978.846	[M+NH4]+	TAG
TG 60:8|TG 18:1_18:2_24:5 [M+NH4]+ & [M+Na]+	19.995	976.831	[M+NH4]+	TAG
TG 60:9|TG 18:0_20:4_22:5	19.613	974.816	[M+NH4]+	TAG

## Sheet: Identified ESI-
Total lipids annotated with MS/MS match in the LipidBlast Library: 89
Metabolite name	Average Rt(min)	Average m/z	Adduct type	Standard use for relative quantification	legend
15:0-18:1(d7) PC; [M+FA-H]-	12.278	797.603	[M-H]-	Internal standard	PC
15:0-18:1(d7) PE; [M-H]-	11.539	709.551	[M-H]-	Internal standard	PE
15:0-18:1(d7) PG; [M-H]-	10.048	739.541	[M-H]-	Internal standard	PG
18:1(d7) LPC; [M+FA-H]-	4.527	573.39	[M-H]-	Internal standard	LPC
18:1(d7) LPE; [M-H]-	4.422	485.338	[M-H]-	Internal standard	LPE
CUDA; [M-H]-	1.984	339.265	[M-H]-	Internal standard	CUDA
PI 15:0_18:1(d7); [M-H]-	9.692	828.563	[M-H]-	Internal standard	PI
FA 16:4	2.53	247.171	[M-H]-	LPC
FA 18:1	6.085	281.249	[M-H]-	LPC
FA 18:2	5.343	279.233	[M-H]-	LPC
FA 20:4	5.146	303.234	[M-H]-	LPC
FA 22:6	4.897	327.234	[M-H]-	LPC
FA 44:5	15.959	637.59	[M-H]-	LPC
LPC 14:0	3.221	512.301	[M+HCOO]-	LPC
LPC 16:0 [M+HCOO]- & [M+CH3COO]-	4.393	540.331	[M+HCOO]-	LPC
LPC 16:1	3.417	538.315	[M+HCOO]-	LPC
LPC 17:0	4.96	554.348	[M+HCOO]-	LPC
LPC 18:0 [M+HCOO]- & [M+CH3COO]-	5.454	582.379	[M+CH3COO]-	LPC
LPC 18:1 [M+HCOO]- & [M+CH3COO]-	4.564	566.346	[M+HCOO]-	LPC
LPC 18:2	3.674	564.331	[M+HCOO]-	LPC
LPC 20:3	4.022	590.348	[M+HCOO]-	LPC
LPC 20:4	3.473	588.332	[M+HCOO]-	LPC
LPC 22:5	3.645	614.349	[M+HCOO]-	LPC
LPC 22:6	3.244	612.332	[M+HCOO]-	LPC
LPE 16:0	4.267	452.28	[M-H]-	LPE
LPE 18:0	5.281	480.31	[M-H]-	LPE
LPE 18:1	4.45	478.294	[M-H]-	LPE
LPE 18:2	3.559	476.278	[M-H]-	LPE
LPE 20:3	3.902	502.293	[M-H]-	LPE
LPE 20:4	3.388	500.28	[M-H]-	LPE
LPE 22:4	4.284	528.311	[M-H]-	LPE
LPE 22:5	3.517	526.295	[M-H]-	LPE
LPE 22:6	3.162	524.28	[M-H]-	LPE
LPE O-16:1	4.707	436.284	[M-H]-	LPE
LPE O-18:1	5.638	464.314	[M-H]-	LPE
LPE O-18:2	4.847	462.299	[M-H]-	LPE
PC 32:1|PC 16:0_16:1	11.458	776.548	[M+HCOO]-	PC
PC 34:1|PC 16:0_18:1	13.152	804.576	[M+HCOO]-	PC
PC 34:2|PC 16:0_18:2	11.605	802.561	[M+HCOO]-	PC
PC 36:1|PC 18:0_18:1	15.273	832.609	[M+HCOO]-	PC
PC 36:2|PC 18:0_18:2	13.518	830.596	[M+HCOO]-	PC
PC 36:3|PC 18:1_18:2	12.054	828.579	[M+HCOO]-	PC
PC 36:4|PC 16:0_20:4	11.13	826.564	[M+HCOO]-	PC
PC 36:5|PC 16:0_20:5	10.081	824.545	[M+HCOO]-	PC
PC 38:4|PC 18:0_20:4	12.911	854.591	[M+HCOO]-	PC
PC 38:5|PC 18:1_20:4	11.177	852.576	[M+HCOO]-	PC
PC 38:6|PC 16:0_22:6	10.607	850.56	[M+HCOO]-	PC
PC 40:6|PC 18:0_22:6	12.303	878.596	[M+HCOO]-	PC
PC O-34:3|PC O-16:1_18:2	12.815	786.567	[M+HCOO]-	PC
PE 34:1|PE 16:0_18:1	12.425	716.525	[M-H]-	PE
PE 34:2|PE 16:0_18:2	11.038	714.51	[M-H]-	PE
PE 36:1|PE 18:0_18:1	14.17	744.558	[M-H]-	PE
PE 36:2|PE 18:1_18:1	12.676	742.539	[M-H]-	PE
PE 36:3|PE 18:1_18:2	11.146	740.525	[M-H]-	PE
PE 36:4|PE 16:0_20:4	10.669	738.507	[M-H]-	PE
PE 38:4|PE 18:0_20:4	12.269	766.542	[M-H]-	PE
PE 38:6|PE 16:0_22:6	10.121	762.507	[M-H]-	PE
PE 38:6|PE 18:2_20:4	10.122	762.508	[M-H]-	PE
PE 40:6|PE 18:0_22:6	11.646	790.541	[M-H]-	PE
PE O-34:3|PE O-16:1_18:2	11.927	698.513	[M-H]-	PE
PE O-36:3|PE O-18:1_18:2	13.654	726.543	[M-H]-	PE
PE O-36:4|PE O-18:2_18:2	12.026	724.529	[M-H]-	PE
PE O-36:5|PE O-16:1_20:4	11.482	722.515	[M-H]-	PE
PE O-38:5|PE O-16:1_22:4	13.179	750.548	[M-H]-	PE
PE O-38:5|PE O-18:1_20:4	13.179	750.543	[M-H]-	PE
PE O-38:6|PE O-18:2_20:4	11.579	748.529	[M-H]-	PE
PE O-38:7|PE O-16:1_22:6	10.868	746.514	[M-H]-	PE
PE O-40:5|PE O-20:1_20:4	14.757	778.578	[M-H]-	PE
PE O-40:8|PE O-18:2_22:6	10.969	772.531	[M-H]-	PE
PI 32:1|PI 16:0_16:1	9.082	807.505	[M-H]-	PI
PI 34:1|PI 16:0_18:1	10.432	835.533	[M-H]-	PI
PI 34:2|PI 16:0_18:2	9.296	833.521	[M-H]-	PI
PI 36:1|PI 18:0_18:1	11.931	863.569	[M-H]-	PI
PI 36:2|PI 18:0_18:2	10.666	861.551	[M-H]-	PI
PI 36:3	5.442	859.534	[M-H]-	PI
PI 36:3|PI 18:1_18:2	9.356	859.535	[M-H]-	PI
PI 36:4|PI 16:0_20:4	9.028	857.518	[M-H]-	PI
PI 37:4|PI 17:0_20:4	9.677	871.532	[M-H]-	PI
PI 38:3|PI 18:0_20:3	11	887.569	[M-H]-	PI
PI 38:4|PI 18:0_20:4	10.361	885.553	[M-H]-	PI
PI 38:5|PI 18:1_20:4	9.106	883.538	[M-H]-	PI
PI 38:6|PI 16:0_22:6	8.604	881.517	[M-H]-	PI
PI 40:5|PI 18:0_22:5	10.303	911.567	[M-H]-	PI
PI 40:6|PI 18:0_22:6	9.862	909.548	[M-H]-	PI
SM 32:1;2O|SM 11:0;2O/21:1	9.777	719.537	[M+HCOO]-	PI
SM 34:1;2O|SM 18:1;2O/16:0	11.304	747.565	[M+HCOO]-	PI
SM 34:2;2O|SM 18:2;2O/16:0	9.859	745.552	[M+HCOO]-	PI
SM 36:1;2O|SM 18:1;2O/18:0	13.088	775.599	[M+HCOO]-	PI
SM 36:2;2O|SM 14:0;2O/22:2	11.413	773.581	[M+HCOO]-	PI
SM 38:1;2O|SM 25:0;2O/13:1	15.168	803.63	[M+HCOO]-	PI
SM 41:1;2O|SM 18:1;2O/23:0	17.779	845.675	[M+HCOO]-	PI
SM 42:2;2O|SM 18:1;2O/24:1	16.804	857.674	[M+HCOO]-	PI
SM 42:3;2O|SM 18:2;2O/24:1	15.214	855.659	[M+HCOO]-	PI
ST 27:1;O;S	5.959	465.304	[M-H]-	LPC
ST 28:1;O;S	6.185	479.32	[M-H]-	LPC
ST 29:1;O;S	6.483	493.336	[M-H]-	LPC

## Sheet: Quantified ESI +
	Lipid concentration (expressed as nmol/mL of plasma) in each sample
Metabolite name	Type	CE 16:0	CE 18:1	CE 18:2	CE 18:3	CE 20:3	CE 20:4	CE 20:5	CE 22:5	CE 22:6	CE 24:6	CE 26:6	DG 17:0	DG 24:3	DG 25:0	DG 25:1	DG 26:1	DG 28:2	DG 30:3	DG 30:5	DG 30:6	DG 31:3	DG 32:0	DG 34:0	DG 34:1	DG 34:1|DG 16:0_18:1	DG 34:2	DG 35:5	DG 36:1	DG 36:1|DG 18:0_18:1	DG 36:2	DG 36:2|DG 18:1_18:1	DG 36:3|DG 18:1_18:2	DG 36:4|DG 18:2_18:2	DG 36:5	DG 37:7	DG 38:10	DG 38:2	DG 38:3	DG 38:5|DG 18:1_20:4	DG 38:6|DG 18:2_20:4	DG 40:2	DG 40:3	DG 40:4	DG 40:5	DG 40:6	DG 40:6|DG 16:0_24:6	DG 40:8|DG 18:2_22:6	DG 41:5
3_26_p	COVID-19	0.163796	1.47485	13.9344	0.189023	0.488105	6.41177	0.175812	0.0786959	1.14283	0.0517887	0.0272071	0.503883	0.257564	0.196584	0.194083	0.586289	0.616257	0.35569	0.60317	3.93431	0.699218	0.624576	0.498729	3.73031	0.47733	1.12979	0.287388	0.826099	0.189965	4.40213	2.13725	8.55557	7.46185	1.0128	53.2558	0.109924	11.4831	0.372378	1.9584	3.20244	3.6452	0.647153	8.26051	0.481105	0.794619	0.0739092	1.80753	0.476443
4_31_p	COVID-19	0.106224	1.55278	8.69875	0.129641	0.605246	5.85395	0.110159	0.0494417	1.1105	0.0177398	0.00974096	0.888632	0.364846	0.339874	0.200421	0.775532	1.1596	0.552484	0.983052	6.97787	1.29809	0.51307	0.527826	3.46632	0.42811	1.13089	0.378433	0.619463	0.140785	5.69876	1.85239	4.00561	1.54766	1.32597	82.5678	0.262584	15.9896	1.19658	1.86418	1.27104	5.94297	2.11804	27.2844	1.4174	1.43892	0.181958	0.276534	0.879645
5_47_p	COVID-19	0.135404	2.63159	11.0911	0.448771	0.897702	13.4969	1.16384	0.205725	3.33183	0.113291	0.057555	1.02554	0.683605	0.462301	0.643254	1.64062	1.49443	1.15567	1.23357	9.16109	2.0728	1.5123	1.14111	16.3995	2.15486	1.60433	0.702341	3.19178	0.599074	21.2396	7.85393	13.1864	4.33597	2.30327	137.913	0.441853	11.0438	1.8041	3.9774	2.23817	8.46078	1.69892	22.5985	4.36682	1.24848	0.243685	1.32023	1.21332
6_44_p	COVID-19	0.0931359	2.64243	15.1828	0.394774	0.985822	8.00115	0.183354	0.118833	1.77037	0.0558392	0.0285193	0.886528	0.359333	0.329975	0.378093	1.04894	1.06651	0.718296	0.919081	7.15016	1.56284	1.21325	0.550623	18.1907	2.53001	2.14001	0.431122	2.14511	0.648665	26.6587	8.60597	11.9288	3.54953	1.46816	88.9098	0.236006	18.5033	1.33137	2.34	0.865598	5.72109	1.80505	19.738	1.18181	0.700957	0.198526	0.254994	0.626147
7_14_p	COVID-19	0.110227	1.29818	7.70605	0.403587	0.293637	0.592889	0.0151904	0.00217603	0.0580003	0.045954	0.0297474	0.933265	0.419966	0.450072	0.81864	2.2223	1.83621	1.49834	1.43967	6.56326	2.87344	1.37546	0.508162	6.19876	0.869888	0.11348	0.944889	1.6513	0.362184	6.07143	2.114	2.84208	1.51919	3.19847	126.684	0.297398	13.7724	2.29463	0.784352	0.356017	7.40062	0.734597	1.42056	0	1.34078	0.279142	0.0361111	17.1353
8_41_p	COVID-19	0.0685562	2.67863	14.016	0.385275	0.90917	7.99959	0.676752	0.101147	2.0222	0.0375445	0.0300762	0.597364	0.281451	0.116021	0.202516	0.663143	0.909935	0.418176	0.68218	4.52365	0.86196	1.78118	0.694905	16.334	2.25656	1.07815	0.285659	1.82135	0.614678	22.1188	7.99919	8.02047	1.95877	0.96145	42.9604	0.140959	9.36117	1.07273	1.69534	0.684929	3.53968	0.791231	10.1432	2.06687	0.636683	0.102541	0.417267	0.367724
9_9_p	COVID-19	0.138682	1.66314	8.09712	0.162012	0.878878	3.98649	0.163493	0.0880884	0.776017	0.0285612	0.0205346	1.80971	0.581426	0.821186	1.62404	4.29738	3.50471	2.75223	2.48447	13.5468	6.48532	1.3314	0.778865	10.1567	2.39475	1.96941	1.85759	2.61959	0.72799	15.4449	5.23679	7.69133	2.81183	6.23657	78.0639	1.11416	35.5752	2.4345	0.636202	0.226325	13.8898	5.75175	26.9195	2.6674	2.35963	0.347958	0.193728	1.86807
12_36_p	COVID-19	0.04504	1.74996	12.8101	0.131238	0.841791	6.72437	0.256796	0.0627124	1.6041	0.0379722	0.0183315	1.02524	0.330416	0.3122	0.418667	1.0676	1.29859	0.746707	0.916163	6.5136	1.65292	1.5822	0.50512	17.8189	2.0716	1.53319	0.466948	1.73509	0.711413	22.5413	7.55858	9.00387	2.16978	1.86448	96.5527	0.34971	19.6858	0.919139	2.20556	0.554584	7.22752	1.53052	21.9353	2.18816	0.984119	0.107066	0.431257	1.08038
13_43_p	COVID-19	0.108951	2.2068	16.2807	0.351917	1.44351	3.9915	0.0742126	0.0665754	0.642761	0.0471317	0.0291831	0.373745	0.241551	0.129139	0.198204	0.458636	0.495917	0.359294	0.349017	2.64154	0.736451	1.51994	0.580952	12.5719	1.7864	0.811439	0.222438	1.85353	0.367004	17.3817	6.14757	7.37947	2.18087	0.659888	46.6543	0.144894	7.40056	0.620743	1.07911	0.445318	2.90946	0.935211	3.17255	0.144498	0.316315	0.0436782	0.168838	0.315981
14_12_p	COVID-19	0.0811463	2.27751	12.4334	0.57303	0.828968	3.86973	0.308733	0.0768423	0.56966	0.0846751	0.0554033	1.16074	0.527558	0.321788	0.552841	1.7258	1.39925	1.10491	0.99503	10.1526	2.39975	1.30556	0.549941	7.6708	1.13489	0.228731	0.698589	1.39723	0.509015	12.3353	6.59514	7.67735	1.3369	2.64589	47.2936	0.455481	12.4428	2.07931	2.38438	0.35223	10.03	1.35273	8.7607	1.19831	1.78308	0.189855	0.00836901	12.2008
15_34_p	COVID-19	0.162539	2.63349	15.1946	0.658314	1.07612	7.74945	0.568917	0.0354364	1.61161	0.0397622	0.0289692	1.32778	0.687781	0.568093	1.06445	3.54014	3.14038	2.27728	2.39682	13.6917	4.60266	0.983488	0.659666	7.45346	1.55246	0.175334	1.7814	2.17792	0.720942	9.72041	4.581	10.458	6.79101	4.71085	125.207	0.52638	32.2324	3.87785	2.88261	2.94513	10.732	3.09893	29.5981	3.7144	2.58487	0.253512	0.902982	7.13913
16_4_p	COVID-19	0.0526067	0.957681	5.56852	0.0267874	0.14665	1.28656	0.0146983	0.00437762	0.11388	0.108573	0.0706769	0.675895	0.867019	0.460172	0.959287	2.79394	2.71702	1.59611	1.95497	5.6782	3.88027	0.669725	0.470851	8.35321	1.77899	0.0711782	0.974094	1.51423	0.751314	21.9462	9.22596	8.25846	3.98259	3.39845	55.8179	0.555848	4.71007	0.118113	2.71616	0.897164	6.13995	0.0791139	1.6506	0.117149	1.9219	0.561597	0.451883	7.17522
18_24_p	COVID-19	0.117184	1.84791	10.643	0.0410511	0.376096	5.86508	0.118409	0.087938	1.22304	0.0347607	0.0226375	1.2033	0.613165	0.476459	0.612345	1.18687	1.22379	1.08756	0.981036	6.1676	1.80771	0.32372	0.203717	3.46777	0.0496354	0.926193	0.912979	0.840114	0.212674	5.95139	2.74301	7.49562	4.37885	1.94863	90.2738	0.324125	27.3638	0.374479	1.14295	1.37507	7.44088	1.80563	24.3009	1.35582	1.85106	0.334469	0.572725	0.934701
19_48_p	COVID-19	0.0530515	2.32022	14.5228	0.503996	0.803392	7.06002	1.74926	0.0231671	1.52713	0.0490939	0.0319005	0.456683	0.253847	0.226318	0.138613	0.451967	0.831348	0.307804	0.576008	3.73126	0.694689	1.27248	0.623812	12.3583	1.99947	1.12008	0.18883	2.08901	0.670768	19.4135	8.82183	12.2003	4.11967	0.72575	22.3891	0.121857	7.44638	0.969717	4.26309	2.8602	2.99065	0.829452	7.22044	3.47908	0.669062	0.0576098	1.07295	0.442573
21_27_p	COVID-19	0.187545	2.54916	11.1705	0.0731398	0.609718	8.30326	0.184299	0.0914851	0.915201	0.0835231	0.0533084	0.643257	0.408266	0.254085	0.357521	0.809342	1.30763	0.609729	0.823984	4.02177	1.11008	1.2259	0.3433	12.8974	2.13492	1.435	0.371534	1.52149	0.336799	19.2013	6.83619	7.63846	1.75139	1.34598	45.7409	0.205364	10.0893	0.205181	2.17269	0.804722	4.57111	1.52378	12.993	0.649516	0.974181	0.199168	0.211769	0.570706
23_39_p	COVID-19	0.084599	2.14118	8.2569	0.0539879	0.428274	6.30193	0.103741	0.0441395	1.14411	0.0419818	0.0249388	0.732903	0.442049	0.297344	0.947919	2.61807	2.66862	1.74252	1.79911	5.73014	3.8799	0.354247	0.0711152	4.1162	0.489729	1.37653	1.10955	0.752916	0.229266	7.40398	2.62947	6.85259	1.63531	3.47114	52.3256	0.349343	13.2902	0.383678	2.20625	1.34688	5.35902	1.57343	14.0357	0.673529	1.05317	0.206112	0.330921	0.898975
24_38_p	COVID-19	0.0916076	1.35966	9.54622	0.0518322	0.563656	2.5056	0.0193939	0.0359737	0.484055	0.021619	0.0144371	1.00128	0.53958	0.395248	0.428028	1.27892	1.95216	0.900988	1.47865	7.50336	1.46952	0.917787	0.466891	6.66158	0.837351	1.4167	0.584325	1.12837	0.265893	8.83606	3.35736	12.3212	9.72548	1.77214	81.5145	0.27276	26.5328	0.553585	1.43946	1.44686	6.77336	2.24659	13.4366	0.409516	2.89304	0.176254	0.847172	0.741002
25_42_p	COVID-19	0.00461599	1.96687	8.33238	0.158814	0.550008	3.64746	0.371723	0.0604866	1.09286	0.0344509	0.0242694	0.726145	0.417319	0.318061	0.484365	1.31572	2.17519	0.859643	1.51639	7.20805	1.76864	0.475834	0.210847	7.68635	1.01232	0.567612	0.52532	0.759293	0.390889	10.1634	3.71418	4.54392	1.2244	1.71526	54.6841	0.297801	14.3029	0.914033	0.82944	0.447869	6.11612	1.4595	8.81303	2.84576	0.920707	0.116563	0.36578	0.90768
26_20_p	COVID-19	0.0846476	1.37917	7.06135	0.0467495	0.335422	7.046	0.066548	0.0706159	0.942163	0.0233152	0.0184536	1.40848	1.24497	0.587447	0.896926	2.10942	2.22434	1.356	1.65468	11.8472	2.78381	0.400671	0.143615	4.61146	0.723894	1.43753	1.02418	0.508608	0.463825	5.767	2.11697	5.16856	2.09318	2.9038	161.473	0.904846	31.4654	0.629448	1.61728	2.62583	10.8207	3.32821	45.4618	1.11169	2.48601	0.361891	1.00594	1.57915
26_66_p	COVID-19	0.0385007	1.72275	9.47108	0.0923894	1.0209	3.31415	0.0429298	0.0357277	0.706676	0.0373635	0.0227773	0.775805	0.425795	0.374073	1.7122	4.76924	3.28624	2.707	2.26704	7.0251	5.53892	0.639661	0.521444	4.64582	0.693215	1.34083	1.45068	1.02377	0.396374	6.4453	2.60818	6.77091	2.45553	5.17233	5.82361	0.514866	17.367	0.738253	1.42775	0.668396	6.20711	2.04271	11.5108	0.431188	1.42185	0.279231	0.33476	0.827133
28_68_p	COVID-19	0.0409767	1.61683	8.22895	0.169243	0.655872	4.79304	0.0609329	0.0248533	0.394546	0.0423516	0.0253221	1.03912	0.722768	0.551181	0.75376	2.13706	4.44877	1.43266	3.1025	7.6122	2.64972	0.51054	0.182041	4.42136	0.581772	1.24495	0.872337	0.589184	0.336313	4.22318	1.61007	5.6441	1.77673	2.42477	4.98385	0.515076	21.5928	1.39001	2.04722	0.84341	8.29783	2.1445	22.4534	0.729765	1.36919	0.300824	0.036756	1.42856
30_40_p	COVID-19	0.12978	2.27755	9.55537	0.209161	0.526448	5.75849	0.398018	0.0694378	0.951442	0.0198301	0.0141113	0.987262	0.443193	0.299507	0.428367	1.09355	1.31218	0.609321	0.941816	6.97841	1.56439	1.24927	0.705014	15.5394	1.52096	2.54624	0.427483	2.23272	0.697307	22.1363	7.10539	14.1874	6.49568	1.41312	79.5393	0.340354	17.0424	1.09617	2.19941	1.12948	6.39909	1.83995	17.1408	2.47819	0.982813	0.155425	0.548907	0.961733
32_63_p	COVID-19	0.0119905	1.77362	11.0621	0.100088	0.534612	6.60328	0.180879	0.0593212	1.48778	0.0407244	0.0288168	0.922957	0.442962	0.399291	0.865944	2.02095	2.90602	1.2481	1.88404	6.56206	2.69269	0.292786	0.119522	2.59795	0.472161	1.17151	0.758747	0.600117	0.313706	5.92181	2.36813	13.6139	7.86303	2.23631	6.59845	0.441881	17.7896	0.514945	2.85292	3.34337	5.8429	1.25253	17.9411	1.19984	1.47026	0.26487	1.43036	1.27056
33_61_p	COVID-19	0.109752	1.88267	9.78484	0.0887761	0.58782	7.09914	0.0596465	0.0499995	1.22395	0.0349149	0.0265035	1.55019	1.30228	0.864966	1.8244	4.86	6.31881	2.88031	4.44101	15.3732	6.47025	0.466505	0.129438	6.59319	1.04884	2.5424	1.5113	0.827595	0.399471	7.31582	3.19372	13.3854	5.04781	6.15741	10.326	0.937394	44.6919	1.411	3.59178	2.34783	13.4489	4.17233	55.8642	1.29836	2.73414	0.555751	0.27474	1.91781
34_46_p	COVID-19	0.101528	1.6323	9.49606	0.0560223	0.454701	5.59366	0.0749096	0.0447468	1.1546	0.0287969	0.0166519	1.00715	0.453529	0.307894	0.901045	2.2746	3.06458	1.4591	2.02577	5.57196	3.71712	0.721295	0.603522	5.33406	0.615653	0.813278	1.18218	1.11487	0.328375	10.6805	4.06432	8.0069	2.88786	3.64796	18.0575	0.370536	22.7423	0.475187	1.44431	0.713227	6.83316	1.37701	19.7687	1.22225	1.04627	0.195264	0.353381	0.802022
35_56_p	COVID-19	0.0498525	2.90665	18.0243	0.837654	0.814177	4.23756	0.0779188	0.034427	0.425471	0.0665682	0.0490968	0.822102	0.262625	0.256556	0.623429	1.75948	2.99796	0.991893	1.93196	6.5568	2.46794	2.20498	1.00939	12.4512	1.92915	0.171329	0.674774	1.83414	0.809067	17.9285	9.57576	12.0127	3.28641	2.43531	5.0049	0.00671405	13.5658	1.90338	4.64092	1.88274	5.4029	0.642503	4.873	0.274514	1.66697	0.175792	0.0906498	7.63271
36_69_p	COVID-19	0.117009	1.64216	7.96922	0.221658	0.675678	3.25028	0.148731	0.0607016	0.266173	0.0228432	0.0139931	0.929355	0.397769	0.258908	0.894859	2.51047	3.35086	1.42527	2.16003	6.72609	3.27233	0.670263	0.346223	8.85005	0.710185	0.863018	0.906986	1.30138	0.339528	14.6161	4.16834	4.77735	1.33713	2.71158	5.66945	0.353581	15.5335	1.49821	1.03947	0.179092	5.6874	1.27788	9.67751	1.39091	1.82741	0.278874	0.0205479	1.0146
37_74_p	COVID-19	0.105811	2.40569	10.0139	0.393897	0.377977	3.1468	0.405029	0.0745067	0.412345	0.0675177	0.0466005	0.504043	0.181424	0.237547	0.504224	1.40104	1.66788	0.77157	1.08255	3.93698	1.82716	0.996994	0.793916	12.0437	1.83948	0.52883	0.395066	2.77816	0.487312	20.8208	9.17195	11.609	4.21846	1.48796	3.00186	0.199607	7.52274	0.701248	2.69112	1.86843	3.39706	0.177984	2.16729	0.755504	1.33665	0.260229	0.739943	0.498814
39_67_p	COVID-19	0.0971683	0.934796	7.30538	0.00810329	0.182041	2.35613	0.0175251	0.0214378	0.240946	0.02184	0.0157679	0.879051	0.511648	0.361933	0.831622	2.03938	2.56869	1.17362	1.63916	5.04219	2.63853	0.459596	0.267808	4.5994	0.359811	0.75224	0.600679	0.891665	0.213453	5.81327	2.07401	6.14617	3.29978	2.44821	4.72739	0.492974	15.9141	0.115398	1.21579	1.15144	5.59334	0.7231	8.92866	0.207313	2.61575	0.303825	0.837495	0.794303
40_72_p	COVID-19	0.0914698	1.53098	6.91122	0.210515	0.249651	1.20103	0.0240547	0.0174747	0.248495	0.0346495	0.0229543	0.681083	0.299285	0.478326	0.687846	1.53813	2.94064	0.86523	1.87625	4.92808	1.78703	0.254943	0.197625	2.78255	0.323619	0	0.549575	0.660886	0.220823	5.57936	2.30718	2.75299	0.862218	2.01712	12.6162	0.334207	12.994	1.71513	0.197037	0.0186679	5.89306	0.654173	4.67246	0.578466	1.59015	0.257981	0.054209	0.942307
41_64_p	COVID-19	0.00885762	1.6278	8.44343	0.0712274	0.580083	6.26781	0.195901	0.0775775	0.633929	0.0309179	0.0212735	0.890704	0.366813	0.333181	0.63385	1.82568	2.39198	1.1019	1.50069	5.99144	2.5007	0.354222	0.209587	4.07431	0.371935	0.491375	0.821977	0.591917	0.213899	7.13505	2.829	4.14457	1.15812	2.52222	6.42511	0.390672	16.6729	0.659821	1.3525	1.01667	5.87304	2.83088	24.5335	1.96933	1.83932	0.388681	0.399246	1.09074
42_71_p	COVID-19	0.0342986	1.48102	8.44444	0.23313	1.21378	3.30191	0.0633031	0.0439384	0.481131	0.0233987	0.0175563	1.13128	0.472783	0.292703	0.640406	1.47883	3.16311	0.827907	1.94258	6.48071	2.27501	0.440828	0.26497	5.58916	0.589728	0.571003	0.559177	0.872666	0.512466	13.9566	5.57281	8.11534	2.17027	1.96693	7.91466	0.404149	23.1991	2.44421	0.714744	0.0510081	7.05621	4.27098	18.0728	1.21024	2.09357	0.384596	0.0865509	1.11318
43_78_p	COVID-19	0.174969	4.49109	19.9962	0.796906	1.44554	9.85449	0.295033	0.140411	1.22481	0.104274	0.0652041	0.8666	0.340433	0.40128	0.293116	0.719539	1.67337	0.466365	1.08031	4.27293	1.10767	1.20636	0.602546	13.2425	2.21866	0.117739	0.277182	1.86721	0.988151	18.3623	11.6183	13.9301	4.02396	0.949469	24.4327	0.267223	16.5299	2.39918	1.84487	1.16326	5.7104	1.27869	16.8112	1.57715	1.25864	0.23289	0.206424	0.782937
44_79_p	COVID-19	0.0817082	2.1941	9.48894	0.189692	0.903433	5.51438	0.192182	0.031191	0.836919	0.0229323	0.0161155	1.22155	0.383551	0.273668	0.399319	1.07729	1.69649	0.65848	1.15756	5.75269	1.69547	0.376764	0.159815	4.40068	0.439002	0.394231	0.373647	0.829505	0.290755	10.3553	3.26299	3.8967	0.892893	1.52183	26.7602	0.365082	22.7598	2.00121	0.830067	0.488525	6.92806	2.93709	26.4605	2.14852	1.52245	0.230872	0.0607892	1.13101
45_83_p	COVID-19	0.0978815	2.22621	7.90704	0.118657	0.620897	5.12178	0.16158	0.0284424	1.05818	0.0488035	0.034041	1.10669	0.525064	0.360599	0.333892	0.917278	1.38646	0.73526	0.975402	7.66902	1.39497	0.89936	0.786076	10.1908	1.14745	0.520373	0.423386	2.57853	0.560206	18.1472	7.16445	6.78244	1.21483	1.55731	17.4037	0.387148	15.7934	0.832627	2.30069	0.597492	6.58019	1.43175	13.5899	1.52674	1.8707	0.304648	0.329727	1.36337
46_70_p	COVID-19	0.0971286	1.83428	7.65136	0.307424	0.533208	7.56926	0.270791	0.0784766	0.988494	0.0261861	0.0177431	0.971897	0.398091	0.283028	0.387971	1.20821	2.21215	0.710767	1.3625	9.1701	1.58935	0.741081	0.310532	10.7148	1.58509	0.863414	0.385646	1.29032	0.540914	18.8971	6.23243	8.3924	2.27944	1.66383	15.7644	0.263682	16.7258	1.80392	3.58609	1.77531	5.93868	1.89154	24.6457	2.46406	1.72575	0.311947	0.37248	1.06616
59_45_p	COVID-19	0.117011	1.94389	8.09904	0.110578	0.402102	2.23575	0.0506143	0.0604964	0.704739	0.0227433	0.0116923	0.776483	0.527667	0.473355	3.31867	9.75438	3.98487	6.6616	3.10021	6.91262	15.4787	0.527444	0.294729	5.8546	0.587738	0.671932	3.42272	0.992038	0.232553	12.5216	3.37681	4.88212	1.25927	12.7856	11.747	0.269005	14.0725	0.667571	1.07887	0.678155	5.41507	0.821711	5.78251	2.09946	2.02283	0.409456	0.3884	0.842211
60_18_p	COVID-19	0.123637	1.69075	7.15845	0.149747	0.474597	6.47632	0.100571	0.0610455	1.6398	0.0245965	0.00982894	0.746173	0.294228	0.37165	0.323028	0.886006	1.93765	0.80484	1.47808	5.0845	1.65825	0.996018	0.423618	11.5171	1.50915	1.72133	0.442194	1.27369	0.305225	17.0784	4.57766	6.42087	2.0031	1.39782	38.6458	0.201189	10.4413	0.780067	2.95865	1.82216	5.31639	0.973544	15.9061	0.958288	1.76273	0.378213	0.545888	0.850413
64_1_p	COVID-19	0.124356	2.41799	9.13651	0.339654	0.569192	2.54917	0.0653795	0.0762117	0.658449	0.0236978	0.0176772	1.19581	0.77749	0.439479	0.918686	3.02056	5.47082	2.08038	3.88976	7.08654	4.97484	0.738984	0.285901	9.07878	1.2054	1.54251	1.1548	1.39929	0.47343	20.208	5.75263	10.1189	3.28114	3.62211	41.1967	0.305925	0.440956	1.66671	2.67109	2.42661	7.72571	1.45143	6.61301	6.93391	1.92265	0.443091	0.366995	1.25007
67_84_p	COVID-19	0.0711985	3.37799	21.7745	0.401792	1.03414	7.37069	0.0739662	0.105847	1.7483	0.0370556	0.0246305	0.867205	0.382002	0.408721	0.422171	1.47014	2.12721	1.04314	1.39803	6.90651	2.50803	0.388106	0.405729	4.93317	1.00138	1.02481	0.777251	1.1007	0.322991	8.08576	3.72003	9.17898	3.95872	2.2661	20.3068	0.185071	23.1681	1.53586	1.59664	0.946171	8.27834	1.84516	22.1155	1.59852	1.58269	0.312197	0.549372	1.09746
76_62_p	COVID-19	0.0312831	0.944204	6.75	0.0387032	0.349612	6.42329	0.216908	0.0810394	1.1502	0.000327253	0.00680042	11.2716	4.97571	0.857915	11.1466	26.349	25.4232	15.7745	8.92472	33.2583	48.9067	0.970747	0.560058	11.7844	0.0276461	2.05874	10.5302	2.0382	1.94524	20.7542	6.81418	7.86066	2.06118	38.3502	106.679	1.86352	69.9955	0.921543	4.14027	1.75435	13.7607	3.44965	84.3411	5.56857	25.7929	5.32924	0.512214	11.335
77_SG_p	COVID-19	0.0296788	1.62646	11.1369	0.2073	0.594725	5.23042	0.0927814	0.0499555	0.596477	0.00138312	0.012602	3.01253	0.803958	0.477269	0.508766	1.34453	2.38385	0.802703	1.03441	5.40852	2.4979	0.8711	0.152184	10.4282	1.53874	1.16576	0.645507	1.03373	0.525911	22.7344	5.2626	7.91121	2.62273	2.02903	134.594	0.359348	19.7794	0.79248	3.59211	1.79647	2.85796	1.21755	16.7481	0.699137	2.23168	0.476906	0.686245	5.83233
86_CE_p	COVID-19	0.0838481	2.0286	9.32783	0.0698088	0.509558	5.50789	0.318555	0.098106	1.83069	0.00449815	0.0137308	4.74216	1.25088	0.550094	1.00592	2.92163	4.45188	1.68518	1.78214	12.5019	4.6026	1.47353	0.590709	21.4512	3.51706	0.41515	1.08555	4.1907	1.45805	66.5485	18.1004	15.1993	3.85981	3.26929	112.654	0.646463	25.1691	0.423983	5.31385	1.63431	4.28903	1.00113	22.6482	2.212	3.35732	0.771889	1.45915	10.9339
87_IRA_p	COVID-19	0.0266727	0.968556	7.76361	0.037863	0.217669	3.90383	0.0246217	0.0350166	0.371177	0.00678697	0.00325504	1.50587	0.442878	0.225736	1.51571	4.31046	11.1482	2.67617	4.15701	7.60844	6.56421	0.599814	0.0832853	3.589	0.548784	1.7314	1.36418	0.418196	0.448611	6.24074	1.84007	8.11433	3.64925	5.17692	3.53735	0.3096	8.32177	0.146758	2.51077	2.28253	1.88392	0.363762	5.59603	0.0940288	4.68911	0.473556	0.601206	4.66741
88_CM_p	COVID-19	0.0696663	1.92761	8.72105	0.0974605	0.415899	6.1855	0.0807516	0.0649448	0.660657	0.00277963	0.00368414	2.68914	0.723038	0.296235	1.40883	3.79985	10.8016	2.16869	4.16671	9.94973	6.07841	1.0309	0.316104	7.78225	1.12553	1.42443	1.25713	1.47508	0.812231	18.8612	5.01967	5.75004	1.85602	4.24503	6.34755	0.450205	14.8693	0.497266	2.68898	1.06599	2.32647	1.0285	19.2795	0.546613	3.81758	0.843972	0.456924	8.37295
89_95_p	COVID-19	0.0806672	2.23331	7.01996	0.134337	0.598326	8.97816	0.538393	0.0721997	1.81569	0.0049164	0.0100454	5.88333	1.34193	0.862156	1.30975	3.48964	4.97679	2.25763	2.11723	14.572	6.39556	1.06053	0.346574	15.8635	1.7895	0.400477	1.63464	2.51523	1.3604	47.3335	10.6851	10.3765	1.35434	5.02271	134.104	0.987752	28.0619	1.2017	7.61588	2.22583	7.40846	2.22848	46.4588	6.4104	4.58734	0.849584	1.3398	15.5161
90_89_p	COVID-19	0.0352853	0.973241	5.91668	0.077747	0.487134	3.5656	0.0994139	0.0267593	1.09403	0.00184589	0.00814109	2.18369	0.686633	0.282793	0.573122	1.52857	2.74894	0.749026	1.15243	6.53131	1.9967	1.0114	0.452076	7.25005	0.862895	1.66991	0.580954	1.69807	0.647597	11.6613	3.11149	7.33067	1.93867	2.03769	57.0473	0.418833	6.73901	0.170006	2.36329	1.4724	2.22495	0.711085	7.39537	0.49632	4.37734	0.533155	0.682008	3.01165
91_80_p	COVID-19	0.0613611	1.88576	10.7984	0.23729	0.600531	6.04534	0.0677114	0.0727318	0.445735	0.00189124	0.00786395	2.94771	0.50452	0.353286	0.606673	1.6509	2.18769	1.03396	0.880875	5.92785	3.19661	0.622809	0.170486	10.2049	0.932752	1.29345	0.798515	1.04793	0.659605	22.2722	5.15174	5.6524	2.29221	2.36899	141.591	0.443303	19.5394	1.34637	2.59111	1.08618	2.85469	1.3118	21.4178	0.70257	2.20103	0.289246	0.203327	4.14075
92_97_p	COVID-19	0.046649	1.27592	6.84009	0.200899	0.734483	5.70802	0.488903	0.101819	1.76182	0	0.00170094	1.89772	0.351152	0.189429	0.281707	0.526443	1.90836	0.343301	0.701802	5.518	0.98028	0.776118	0.287585	9.15736	1.0804	1.10356	0.262827	1.5772	0.52272	18.4909	4.41746	6.96706	2.43848	0.784564	64.6458	0.224038	13.2125	0.870915	2.10052	1.46009	1.71846	1.58251	19.3735	2.48017	2.38966	0.427972	0.910233	2.01078
94_99_p	COVID-19	0.0425026	0.876786	3.49048	0.0598591	0.265376	2.63679	0.0756792	0.0185594	0.654497	0.00110286	0.0039452	2.90612	0.995613	0.314903	0.570738	2.06884	8.0071	1.31904	2.97781	10.7141	3.40152	0.815431	0.542783	6.5177	0.00862549	0.926251	0.965711	0.937813	0.641424	14.3628	3.28583	7.80551	2.57837	2.58709	140.419	0.507256	9.45399	0.340612	2.25157	1.70913	3.16765	0.810305	11.8244	0.690555	5.14032	0.846038	1.22836	3.50803
96_82_p	COVID-19	0.0311347	1.22794	6.2983	0.40634	0.381313	4.46098	0.116036	0.0467814	0.967998	0	0.00149917	2.36503	0.565796	0.292544	0.435983	0.913824	4.04451	0.560627	1.48963	6.83432	1.69222	0.640971	0.00645344	12.1014	1.33796	1.72173	0.477789	1.16162	0.452591	28.177	7.14333	7.6403	1.86489	1.26936	148.606	0.28913	12.2785	1.50493	2.63918	1.24223	2.00171	0.722412	10.289	0.829023	1.87413	0.32399	0.624688	3.32789
97_101_p	COVID-19	0.0449423	1.59469	6.46465	0.0382912	0.21561	2.25971	0.0391426	0.0103398	0.517416	0.00549161	0.0094766	2.42767	0.471096	0.271061	0.730173	1.80086	4.81053	1.20378	1.89932	8.27332	2.79683	2.84339	1.44562	26.0326	5.14506	0.367022	0.82624	6.55245	1.53685	60.7997	19.8332	9.97107	1.46766	2.19633	113.539	0.330102	8.44163	0.19732	4.32823	1.28745	2.16477	0.272226	5.60844	0.239508	3.32672	0.483599	2.10102	8.18586
111_94_p	COVID-19	0.0740626	1.90051	9.03738	0.0582493	0.429499	7.87826	0.0676815	0.0561672	1.20205	4.56886e-05	0.00643282	2.30985	0.458306	0.249518	0.643709	1.37139	5.94064	0.7484	2.14606	4.29316	1.97543	0.721795	0.218791	6.83758	0.940094	1.22638	0.531461	1.2286	0.560876	15.7794	4.19318	7.45372	2.48277	1.46041	31.1989	0.30096	14.2377	0.236474	2.78599	1.85395	2.10617	0.688381	14.8324	0.450035	1.37986	0.204777	0.925755	2.64579
122_106_p	COVID-19	0.142148	1.29709	8.52293	0.0259916	0.204585	2.3446	0.195343	0.0178562	0.472231	0.00138463	0.00376601	1.29704	0.224184	0.104565	0.126449	0.245925	0.533688	0.123695	0.157612	2.37948	0.435134	0.750647	0.321287	5.63914	0.904174	1.86103	0.0808406	1.27808	0.422717	13.0028	3.5274	9.62909	5.74113	0.253431	5.05776	0.146057	5.11186	0.0507402	0.797629	1.90051	1.17186	0.0529112	2.30489	0.490321	1.405	0.139465	2.33977	2.59469
124_104_p	COVID-19	0.123611	3.01717	11.2193	0.173416	1.37967	7.74438	0.30097	0.165188	2.09726	0.00170002	0.00729276	3.59794	0.847656	0.194762	0.451917	1.73382	3.4785	0.523044	1.11334	7.02935	1.91738	1.56791	1.0789	16.0724	1.71758	1.60147	0.348514	3.07646	0.942665	31.2563	7.19682	7.41431	0.934106	1.35618	23.5847	0.396129	22.8711	1.42083	2.41427	0.788936	3.46825	3.87312	39.4469	2.82432	2.20958	0.350288	0.182733	10.6602
125_109_p	COVID-19	0.0821596	1.19766	8.35514	0.0323486	0.37736	2.01219	0.00886165	0.029174	0.257173	0.000476845	0.00340698	2.97673	0.446881	0.228464	0.219632	0.782041	2.12712	0.319525	0.658549	4.5349	0.977427	0.579207	0.305519	5.35734	1.02798	2.91619	0.18513	1.15193	0.689444	11.9846	3.40184	8.37051	3.0848	0.578331	12.2176	0.335936	16.2304	0.358144	0.940796	0.871067	2.53462	1.19861	9.11015	0.141994	2.0828	0.248687	0.131885	2.47556
126_AA_p	COVID-19	0.136614	1.97504	8.23975	0.127905	0.544599	4.57723	0.0551431	0.0272429	0.309136	6.95647e-05	0.0031215	6.77335	1.14451	0.578421	0.631702	1.58356	2.75432	0.682063	0.831371	10.3172	1.72551	0.623031	0.256449	8.30764	1.10558	0.93771	0.413579	0.698194	0.986165	19.1224	5.15315	6.18499	0.303416	1.55474	84.3266	0.652551	43.9441	2.25503	1.32261	0.34984	5.13284	5.10224	40.0524	1.40765	2.15116	0.427932	0.0260302	13.5096
127_RI_p	COVID-19	0.164415	2.23833	6.92338	0.0645927	0.28952	3.17232	0.029633	0.0505843	0.562417	0	0.0057098	4.45586	0.867078	0.5669	1.00326	1.80703	2.81389	0.868231	0.867699	6.6347	1.75968	0.660044	0.32427	8.14635	1.04212	2.48807	0.647285	1.39013	0.871268	29.3906	7.36648	10.438	2.52924	1.96656	39.1382	0.459987	19.4591	0.439164	3.36893	1.57093	3.91378	0.616742	13.8213	0.554242	4.01046	0.640614	0.758519	6.71396
128_98_p	COVID-19	0.135694	2.26962	8.70634	0.122307	0.317919	4.20841	0.0581248	0.0504833	0.565197	0	0.00278807	4.73989	1.14523	0.395857	0.588626	2.19762	3.50834	1.09446	1.08666	7.65026	2.38889	0.684787	0.339031	8.20675	0.883657	2.70859	0.736054	0.799267	0.65129	21.3871	5.26291	7.87259	1.58196	2.65386	36.8293	0.597942	29.8489	1.23415	4.54411	2.50174	3.96232	1.5146	26.2967	0.912483	3.01689	0.340746	0.500252	10.2583
129_108_p	COVID-19	0.107254	2.85818	8.18042	0.542287	0.435501	3.34968	0.0819946	0.0479075	0.324737	6.92668e-05	0.00122911	3.5906	0.695067	0.419873	0.72354	1.69965	4.56962	0.563443	0.993061	7.25764	2.1279	0.436082	0.113215	6.32038	1.18035	1.92483	0.360819	0.606227	0.747692	14.5845	4.92871	2.85795	1.04153	1.18979	23.4396	0.632581	21.4739	3.46737	1.9858	0.988387	3.6509	1.88534	14.7424	1.10717	2.38234	0.383223	0.215434	9.29182
130_111_p	COVID-19	0.0759992	1.70251	6.88118	0.0502964	0.389411	5.16971	0.109891	0.0557797	0.664129	0	0.00516828	3.40621	0.600217	0.296313	0.842168	1.91034	3.31954	1.03081	0.837755	6.28623	2.81883	1.35626	0.325001	12.8797	2.13811	0.138547	0.736303	1.74118	0.811828	38.2249	11.4613	14.0039	2.8771	2.30164	32.7998	0.450277	17.3829	0.450925	4.73293	1.64373	2.82351	0.663616	19.2264	1.21859	2.65504	0.397472	1.66149	6.58879
140_12POS_p	COVID-19	0.00421357	1.36328	5.38572	0.0709917	0.493268	6.95553	0.0426485	0.0541205	0.48596	0	0.00407658	12.005	2.03306	0.966057	0.444115	1.19026	13.1401	0.216658	4.12669	12.0023	2.09261	0.999558	0.107081	16.79	2.37448	4.94982	0.619102	2.3829	2.07516	62.2003	15.1075	19.4642	3.35304	1.74515	186.346	0.89066	47.2892	2.07103	10.8987	3.11186	12.8395	4.60727	82.4674	2.16866	2.968	0.126427	1.19719	8.86536
141_93DLMC_p	COVID-19	0.0164948	2.25131	11.9569	0.936122	0.943931	4.90335	0.471544	0.0343527	0.487802	0.00276947	0.00288392	4.02754	0.978152	0.482947	0.34033	0.860852	17.8946	0.291582	4.98424	5.71789	0.844032	0.745281	0.216566	7.97625	0.876899	1.01132	0.204054	0.991128	0.686266	12.2469	3.28501	4.57784	1.76507	0.573685	72.7838	0.418655	25.7466	5.2085	2.35206	1.23039	3.45934	2.94145	22.5932	2.60877	1.12211	0.205015	0.268394	14.3891
142_8POS_p	COVID-19	0.0187751	1.45047	6.05424	0.037526	0.222564	3.49284	0.0782076	0.0467198	0.391475	0.000268031	0.00241937	13.3621	4.92771	2.74654	2.68874	4.93707	51.7728	1.98988	13.5316	29.3313	6.4995	1.11307	0.0937226	12.026	2.41509	3.2395	1.76296	1.67132	3.52263	29.1736	9.89461	13.2456	6.20159	5.17113	370.172	1.92979	85.5218	1.38635	6.0141	7.35769	13.121	4.91847	107.286	4.5761	11.2631	1.07043	1.58528	17.8936
144_4POS_p	COVID-19	0.0297246	3.09666	13.2393	0.125288	0.28395	3.42156	0.0309182	0	0.17579	0.0036336	0.0249279	2.04018	0.874939	0.143122	0.317832	0.607331	21.3021	0.326495	5.34509	5.69394	0.760617	0.731212	0.0868681	9.54471	2.30323	0.020968	0.252672	0.607385	0.381183	34.6541	11.721	13.6484	3.72177	0.672293	55.0445	0.370258	6.68705	0.102028	6.12311	2.75293	2.05402	0.129704	2.55945	0.0596265	2.61542	0.213064	0.814764	17.261
145_13POS_p	COVID-19	0.014311	2.01076	7.86685	0.0975592	0.668243	5.18806	0.0660272	0.0505984	0.628948	0	0.00282014	5.45545	1.26812	0.614101	0.302278	0.806407	20.5854	0.244817	5.39603	8.52007	1.11671	0.912001	0.365424	9.4849	1.40144	2.88608	0.212186	1.20771	0.859409	21.5579	5.76801	9.0851	2.04313	0.796928	132.267	0.548703	37.1345	1.08483	2.87652	1.66822	4.23704	3.81332	34.3663	1.14968	5.09993	0.431894	0.287555	6.75525
146_6POS_p	COVID-19	0.0275934	1.42206	5.50086	0.056752	0.182981	2.13602	0.0182187	0.0360114	0.315282	0	0.00618359	3.98251	1.12052	0.604667	0.709437	1.52684	38.0464	0.557141	10.1734	6.3134	1.73265	0.724145	0.286101	8.4859	1.34214	2.68644	0.374673	1.54046	0.542728	30.1544	7.82836	10.9016	2.28121	1.02645	64.3793	0.54638	14.6484	0.364129	2.94857	1.13622	3.51506	0.320127	8.01965	0.332716	3.38636	0.422475	0.778081	5.9798
148_2POS_p	COVID-19	0	1.04457	7.29214	0.17233	0.372343	2.6848	0.197021	0.0245421	0.698174	0.000711826	0.0118514	2.79161	1.19097	0.383378	0.427314	1.13001	6.04931	0.461856	1.33972	5.61669	1.2012	0.582451	0.337619	6.97578	0.966396	1.25415	0.320131	1.31844	0.669105	24.3707	6.81741	11.1243	2.56669	0.906002	78.9384	0.436526	7.23815	0.395958	3.27431	1.18425	2.66461	0.549888	5.50861	0.681182	1.76372	0.311156	0.643703	8.9161
150_3POS_p	COVID-19	0.00550428	0.522608	1.44508	0	0.0425516	0.508563	0	0.00168408	0.0180534	0.000982443	0.00337527	15.6512	3.55306	1.08517	1.23203	2.72983	85.8972	1.12748	21.6851	12.2776	4.31794	0.952639	0.529701	10.0586	1.50953	3.63477	1.18753	1.17585	2.11341	27.6223	8.82851	9.17719	1.58995	2.7597	164.308	1.53006	31.8675	0	2.15441	0.219215	12.1979	0.785883	11.3875	0.130604	4.97592	0.626804	0.0262556	33.1754
152_9POS_p	COVID-19	0.00256598	1.77374	7.77756	0.0840553	0.509621	3.38959	0.0375538	0.0321748	0.210925	0	0.00346407	15.1156	3.92761	1.57253	3.00534	6.18044	475.085	3.56449	104.442	30.7949	8.17005	0.991143	0.494698	13.8049	2.33294	2.1433	1.88581	1.84586	3.69108	28.006	9.5043	8.64299	1.37683	4.82706	412.294	2.44724	118.129	3.38124	1.74144	0.428023	15.4545	9.50307	94.4088	2.61797	6.20966	1.30669	0.0634096	31.6934
192_127_p	COVID-19	0.0688821	2.31907	13.2499	0.464332	0.90545	6.44102	1.46257	0.0331466	0.827667	0.0023024	0.00527035	1.16212	1.17994	0.100392	0.264672	0.686715	2.06516	0.214142	0.576409	0.405218	0.974315	0.781806	0.451505	8.61652	1.82568	0.0683221	0.194722	2.96563	0.855513	27.1099	11.6513	14.1044	9.69036	0.676173	30.1033	0.446321	4.80578	0	5.99109	2.69479	4.58512	0.121542	5.76056	0.0988677	4.86501	1.04246	2.73087	4.20493
193_136_p	COVID-19	0.1028	2.96256	14.0553	0.150513	0.644779	3.86966	0.140074	0.0588021	0.314361	0.00634932	0.0158476	1.03507	0.86382	0.258852	0.35014	0.610483	1.10456	0.328364	0.344082	0.00665331	0.848272	0.626086	0.246388	5.9632	1.29907	0.611153	0.264721	1.16218	0.348533	12.652	5.72533	8.94744	3.6608	0.737354	28.2274	0.40036	12.0019	1.73358	9.84919	7.78424	3.81679	0.690456	10.09	1.70506	7.36937	1.18426	0.961877	6.92663
194_130_p	COVID-19	0.0940038	2.73891	11.071	0.25819	0.810312	5.10145	1.14763	0.166539	0.980543	0.00548585	0.0120081	0.755715	0.950714	0.243038	0.121804	0.281353	0.953619	0.048589	0.282055	0.0115423	0.394271	1.09194	0.14353	11.0887	1.97211	0.943647	0.07044	0.851913	0.370989	21.556	9.40017	10.7997	1.99074	0.216763	14.2998	0.31657	5.9338	0.0497551	7.25939	3.14807	3.50594	0.0484564	4.26279	0.437854	6.46561	1.24007	2.12392	6.658
195_132_p	COVID-19	0.0319409	2.30726	13.3547	0.248836	0.634666	5.28342	1.18204	0.144425	1.31179	0.00301608	0.00393277	0.710844	0.893565	0.228447	0.424564	1.00619	2.14633	0.530149	0.603299	0.00633851	1.13154	0.0140589	0.0118636	0.883111	0.157109	0.188377	0.327424	0.123207	0.0878887	2.78479	1.42396	4.7511	0.500387	0.98512	13.0219	0.397141	5.52329	0.167821	1.35007	0.517239	3.1245	0.307926	6.63291	0.374504	4.84594	1.00957	0.282376	2.52466
196_16POS_p	COVID-19	0.0408261	0.950284	5.23048	0.104352	0.219822	1.74982	0.0466099	0.0229966	0.237975	0.00112711	0.00509146	0.978435	0.970245	0.133341	0.226006	0.493913	1.65301	0.180613	0.462169	0.00539709	0.723169	0.544455	0.201356	6.32767	1.0758	1.84615	0.11952	0.738778	0.280577	9.82885	3.87944	10.9234	5.71506	0.461953	20.1805	0.361526	8.44349	2.00503	2.12248	2.30369	3.56017	0.982479	12.9571	1.84037	7.08345	1.06631	2.46719	2.63361
197_139_p	COVID-19	0.00453975	2.07913	14.9038	0.171081	0.37756	2.91184	0.564447	0.0727958	0.471509	0.000187433	0.00695057	0.909953	0.804956	0.183975	0.117711	0.456217	0.972386	0.156927	0.260642	0.006206	0.650384	0.175177	0.00860753	2.87679	0.559215	0.479555	0.0909348	0.288714	0.141209	9.53681	4.30563	5.21229	0.841006	0.468764	20.5206	0.318229	10.1627	1.03802	0.843474	0.328806	3.14857	0.982946	10.7155	0.254474	4.1239	0.960456	0.0410029	6.31685
198_14POS_p	COVID-19	0.0409527	3.45758	17.6974	0.209214	0.370337	5.37821	0.0737962	0.0825895	0.53561	0.000255071	0.0178019	0.927575	0.918769	0.170655	0.238633	0.544513	1.74845	0.224471	0.428327	0.514517	0.695268	0.9869	0.00831625	9.98622	2.83263	0.74673	0.199253	1.49891	0.48973	19.7407	9.79418	11.896	2.26446	0.551862	16.5556	0.364509	7.78952	1.20389	7.51373	3.56505	3.46843	0.323794	7.17206	1.03034	6.49365	1.1178	2.21817	6.86229
199_15POS_p	COVID-19	0.0155451	1.58695	8.54378	0.293368	0.362886	2.83258	2.01412	0.110009	0.580818	0	0.00423044	0.808465	0.641396	0.144491	0.135068	0.243048	1.15338	0.122327	0.226375	0.56197	0.407769	0.0958546	0.0100259	2.76614	0.572253	0.70232	0.0738395	0.265966	0.191801	4.84289	2.2677	4.21426	1.81699	0.221518	15.5145	0.313847	10.5573	0.280652	1.10243	0.854168	3.22837	0.936448	9.07851	0.747826	5.78829	1.15224	0.985881	0.932855
200_125_p	COVID-19	0.041616	2.33448	14.0628	0.267344	1.01036	5.61864	0.268904	0.0743042	0.724747	0.00302371	0.00700174	0.842283	0.782468	0.111752	0.226848	0.517344	1.66425	0.179758	0.380196	0.372628	0.865511	0.195737	0.0618965	2.53279	0.555351	0.100891	0.163331	0.58198	0.271993	8.1689	3.82155	4.95577	1.04607	0.5204	37.0829	0.304206	9.58101	0.695727	1.32332	0.700182	3.20991	1.09107	12.1525	0.66932	4.44625	0.78009	0.04872	4.26718
201_138_p	COVID-19	0.047888	1.34641	5.50864	0.213232	0.252476	1.65166	0.0522327	0.0173208	0.133825	0.00094615	0.00719654	1.02199	0.751371	0.116489	0.133394	0.326415	0.802421	0.106647	0.189126	0.0592521	0.47708	0.382209	0.226407	5.06521	1.08418	0.0371499	0.112655	0.887629	0.370282	13.7103	6.8456	10.8043	3.25491	0.306331	23.0921	0.279746	9.51584	0.367666	3.48253	1.85423	3.56206	0.574251	16.152	0.537883	4.96858	0.87002	1.00759	4.33514
203_129_p	COVID-19	0.0398338	2.44015	11.0912	0.201612	0.433533	6.42403	5.97859	0.142799	1.7364	0.000375022	0.0068895	0.921905	0.858476	0.223665	0.392159	0.747228	1.52187	0.363633	0.354914	0.3241	0.994651	0.669412	0.165608	8.02038	1.82652	0.363551	0.195078	1.06751	0.388366	19.2099	9.41077	6.66676	1.12961	0.544457	26.2935	0.331819	9.20026	0.975616	3.52866	1.12028	3.53865	0.682339	16.9873	1.15457	5.01588	1.05648	0.506626	6.35155
204_126_p	COVID-19	0.0296062	1.48984	8.07605	0.32358	0.418848	3.51749	0.158486	0.0525968	0.573225	0.0022884	0.00535297	0.778817	0.62284	0.125053	0.167804	0.386974	0.80074	0.139497	0.193756	0.258071	0.466387	0.0743423	0.0838844	1.84468	0.429504	0.101052	0.091921	0.415575	0.207539	6.46765	3.17384	3.92866	0.676194	0.285695	15.6637	0.215394	10.0746	1.29768	1.59401	0.679136	2.94103	0.76716	16.4187	1.38017	3.14917	0.694697	0.315153	4.07292
205_134_p	COVID-19	0.0597834	1.67022	12.3927	0.270199	0.575561	5.11168	0.321771	0.0485415	0.851683	0.000437281	0.00711729	1.00301	0.74312	0.115365	0.24964	0.422756	1.40128	0.186027	0.333665	0.391889	0.726232	0.119752	0.00395501	1.9037	0.00709128	0.426999	0.106641	0.119787	0.105621	3.36152	1.40583	2.28523	0.274607	0.428711	21.9666	0.299578	13.0143	1.45457	0.710113	0.175544	3.10625	1.46905	17.4977	0.869298	3.70978	0.751547	0.0264871	5.01538
10_B_p	HEALTHY	0.031181	2.34534	13.7556	0.659996	1.28324	7.22884	0.192156	0.0255996	0.816061	0.0454453	0.0258327	2.45429	1.02712	0.737309	1.66863	4.26315	3.07917	2.44091	2.03239	16.1016	6.93068	1.75773	1.55078	12.9762	3.2137	0	1.60922	3.44577	0.866904	13.5691	10.3457	10.9403	4.07676	5.2425	167.606	1.04562	51.7089	7.65096	5.91943	1.63181	17.3811	5.7524	28.3731	2.97558	2.97283	0.512894	0.298918	36.6394
17_D_p	HEALTHY	0.109451	2.05916	9.7851	0.266671	0.596404	5.419	0.57798	0.0587803	1.48498	0.0257392	0.0157555	1.00235	0.562524	0.295292	0.535286	1.57452	1.38326	0.972184	0.958555	7.24625	2.51552	0.206975	0.32619	1.78786	0.0793564	0.0318988	0.628382	0.4987	0.184286	5.0823	3.06555	3.78172	0.897636	2.04906	52.2646	0.425021	24.6155	2.43046	0.457711	0	6.6969	2.19387	28.4501	5.51361	1.41012	0.305067	0.1758	0.820491
22_C_p	HEALTHY	0.0260016	2.51051	14.3635	0.470077	0.743146	4.41004	0.244842	0.0459174	0.682914	0.0327156	0.0251085	0.926924	0.587041	0.340921	1.82309	5.51911	2.99375	3.13065	2.18125	9.46024	7.96579	0.581738	0.105952	3.38354	0.479096	0.0782044	1.58107	0.647904	0.319312	2.63898	1.87386	6.11999	2.80253	5.47689	43.1331	0.500931	25.6558	2.49255	1.07386	0.363235	7.79032	2.3169	12.761	1.2392	0.959938	0.180222	0.0748897	1.16825
31_A_p	HEALTHY	0.00719764	1.55737	11.8088	0.357763	0.708605	6.97185	0.163767	0.0730383	0.990316	0.0370952	0.0263628	1.00424	0.641466	0.356723	0.752523	1.81926	1.54923	0.997782	1.06388	7.52889	2.29204	0.193211	0.170921	2.78206	0.0511036	0	0.555796	0.331566	0.13042	4.36811	2.66507	7.96284	4.89316	1.90616	50.6636	0.38381	27.0997	2.4007	1.39221	0.999781	7.15169	3.12432	31.0385	1.43122	0.852449	0.255898	0.141679	0.883775
121_SC_p	HEALTHY	0.120052	2.00464	10.7298	0.56095	0.604735	3.51768	0.133367	0.0323902	0.192402	0.00108943	0.00301947	15.4806	3.08534	0.869686	2.28648	6.03242	3.67202	2.31606	1.22362	30.4625	7.43579	1.88973	1.06367	10.9857	1.58357	0.229712	1.20463	2.23326	2.24948	18.8678	5.72415	6.45255	0.866008	5.64845	73.0734	1.71924	105.976	21.5531	6.46347	3.6461	12.3607	13.1504	96.9575	7.10614	8.89114	1.8098	0.371494	92.6532
131_NC_p	HEALTHY	0.0911262	1.85058	9.50488	0.177933	0.394711	3.0308	0.103931	0.0363728	0.559255	0	0.00183159	43.1459	12.0055	6.11487	7.26549	12.2762	14.9016	4.99651	3.7054	87.2524	18.5789	2.78784	0.929283	18.1476	2.22162	1.02159	3.55732	1.1789	3.82537	51.2997	15.5807	38.3294	11.3121	12.4682	297.386	5.2911	265.668	13.7968	19.455	14.664	39.4407	16.7725	190.242	11.8215	23.5072	3.27901	0.931314	220.986
132_ST_p	HEALTHY	0.0636582	1.81407	7.8383	0.20925	0.617329	4.70765	0.146312	0.0613939	0.763242	0.0037747	0.00162083	58.4427	12.7011	4.48268	26.2273	50.3811	19.3489	32.0124	4.31784	131.045	86.6729	0.711106	1.84122	20.8	3.04468	0.378496	22.3405	2.66786	6.08944	139.496	39.8806	47.7185	6.31856	58.3479	309.086	9.24141	583.683	34.2989	14.4255	2.68593	52.5963	61.907	579.2	31.3803	29.1439	6.93332	0.170924	180.354
133_EB_p	HEALTHY	0.0719554	1.66328	8.27036	0.108169	0.340792	3.36248	0.210704	0.0259913	0.833266	0.000192543	0.00497564	13.6236	4.17285	1.52589	2.26013	4.72148	4.7989	1.85456	1.17167	28.8671	6.89712	0.693531	0.495048	7.58181	0.0545463	0.0342534	1.0862	1.15158	2.21071	28.5266	8.97201	12.2333	1.70495	4.4923	87.8864	1.89004	73.094	2.61594	3.64602	0.315664	10.9706	4.8952	67.9629	5.61177	6.56735	1.12456	0.0508549	78.1355
134_EM_p	HEALTHY	0.0658108	1.43413	7.34247	0.167173	0.5195	3.40681	0.137497	0.0355643	0.523416	0.00221672	0.00416742	15.4918	4.35051	1.39495	1.64664	5.87564	5.6056	2.22582	1.22144	33.2351	7.10822	1.47516	0.187093	8.20225	1.0089	0	1.0312	0.113302	0.809922	20.0242	6.23054	20.8632	7.95858	4.58656	83.8162	2.24399	85.0734	4.40526	3.76162	3.61836	12.7064	9.45891	80.391	4.27444	9.27616	1.35427	0.499436	63.9533
135_MC_p	HEALTHY	0.073055	2.68646	18.6281	0.745508	1.53606	7.16264	0.40245	0.0710708	0.891102	0.00261607	0.0102166	2.43272	0.823823	0.268929	0.309927	0.66138	0.621429	0.276196	0.132414	4.62141	1.04601	1.44201	0.898138	12.1668	2.37367	0.295186	0.161554	2.92309	0.826646	27.0733	8.73662	9.46079	2.36563	0.625186	19.0662	0.27911	13.5357	1.9316	3.58287	1.74733	2.01745	1.41668	11.5338	0.936142	1.52806	0.257501	0.52684	14.1357
136_MM_p	HEALTHY	0.0620053	1.61859	8.36644	0.193347	0.585467	4.88772	0.121814	0.0506461	0.61109	0	0.0014794	34.2087	8.92679	3.1117	3.33894	8.92527	9.29131	3.68446	2.27474	70.1231	11.3259	2.47874	0.339744	19.5817	2.55901	0.0767603	1.3731	2.73964	3.9415	76.656	22.9119	22.8733	0.969579	6.77898	158.494	3.93712	241.566	14.268	8.81449	0.696735	26.7203	26.8489	293.627	13.5738	13.9957	3.22339	0.396348	89.2629
137_AI_p	HEALTHY	0.0655528	1.24126	8.6696	0.113582	0.561536	2.79367	0.0497166	0.0283969	0.244135	0.00127633	0.00226223	11.5027	4.47256	2.0417	2.89198	6.99114	7.7036	3.11649	1.96545	28.537	10.3169	0.449307	0.0813439	6.87241	0.417753	1.0253	1.60687	0.502938	1.51228	31.8296	8.95962	35.4694	19.8968	6.15242	58.723	1.89184	70.1944	1.59154	4.16911	3.60674	10.1415	6.17532	34.8005	1.67706	9.71373	1.60752	1.0852	18.2101
138_EA_p	HEALTHY	0.00473287	0.924951	5.53544	0.119166	0.330575	2.31577	0.0967141	0.0228092	0.366197	7.23143e-05	0.00504911	11.9709	4.63489	1.20902	2.45086	5.25979	4.71978	2.3942	1.23602	36.9668	8.3473	0.913864	1.02309	11.675	1.53977	0.0891974	2.17644	3.22975	2.88243	42.8023	12.3754	15.4062	2.34202	5.41046	85.9718	1.82171	38.2996	1.75918	5.0777	0.273487	11.1705	4.23481	37.4952	2.54501	8.77316	2.0012	0.251106	41.396
183_3SA_p	HEALTHY	0.074934	2.3718	11.9418	0.384753	0.818299	5.41982	0.435789	0.016305	1.02487	0.00169933	0.00130689	4.27744	2.42516	0.231613	0.556221	1.1071	3.67659	0.404705	0.758708	22.8341	1.85146	0.305872	0.683062	5.25902	1.35765	0.013293	0.072047	1.30066	0.69182	12.8029	6.6708	8.45317	1.80159	1.34309	74.5027	1.05124	58.3518	7.14002	4.83433	3.44682	11.2683	6.94326	65.7927	7.50465	2.73748	0.72706	0.0366134	41.5109
183_5SA_p	HEALTHY	0.173014	2.47526	13.1628	0.35952	0.701951	6.12277	0.275939	0.0599367	0.867999	0	0.00300104	14.9276	8.91142	0.114022	1.94338	8.38041	24.4124	3.55548	3.92692	59.8261	12.4568	0.230239	0.175501	9.08613	2.96537	0.0803288	2.64268	0.613745	0.270066	38.6895	20.511	20.1291	2.16739	7.64674	182.623	3.61703	201.973	26.0308	8.96564	1.72888	39.5338	23.9386	304.184	19.385	7.03994	2.32915	1.09646	103.86
184_6SA_p	HEALTHY	0.13882	2.28779	10.6353	0.167035	0.578853	4.37041	0.255433	0.0185402	0.695471	0.00132252	0.00183886	2.32934	1.59812	0.0629393	0.911435	1.57926	12.5642	1.086	2.55208	12.4948	2.69769	0.226154	0.101492	4.07319	1.01374	0.108746	0.743295	0.606763	0.345639	17.5736	9.03244	13.6784	3.65095	1.77775	39.9067	0.631215	23.5212	1.21195	4.12251	2.65372	7.10761	1.86134	26.9345	2.11031	2.7213	0.903598	0.983842	14.9732
184_13SA_p	HEALTHY	0.228478	3.7518	20.6295	0.981331	2.01334	8.55796	0.262355	0.121067	0.505544	0.00142424	0.00478818	1.9046	1.16258	0.132416	0.589792	1.26243	4.10443	0.398002	0.85997	7.89561	1.66182	0.41559	0.219711	4.90858	1.17866	0.0691661	0.334382	0.727712	0.353127	10.2782	4.96619	8.25222	3.23463	1.11468	27.0543	0.442871	17.9164	4.5408	4.20727	2.47277	5.00029	3.03214	21.8803	1.51883	0.95794	0.311508	0.27041	25.0236
185_10SA_p	HEALTHY	0.0717881	3.27345	17.7225	0.561917	1.59167	7.47779	0.538645	0.122014	1.41809	0.00118647	0.00341984	5.96127	4.702	0	1.48678	4.7069	13.2223	2.27144	2.00297	37.8285	6.89526	0.131271	0.271276	6.94363	3.0655	0.182748	1.53275	0.932525	0.497504	24.8346	17.4685	14.6361	3.12524	4.59966	99.6418	2.34991	90.2965	15.684	4.25662	0.286427	18.2783	17.9532	137.957	18.2927	8.43916	1.8594	0.747631	43.1671
185_12SA_p	HEALTHY	0.0173143	2.41675	16.127	0.293905	0.60395	5.41608	0.10559	0.0731146	0.88613	8.29487e-05	0.00630846	4.13206	2.61737	0.188664	0.711259	1.37051	24.8767	0.841639	4.44306	22.3551	2.29981	0.424678	0.579797	7.5627	2.17025	0.026612	0.479681	2.21254	1.16283	23.0323	11.6089	14.5761	2.44864	1.3027	71.5098	1.08466	50.59	5.19404	4.18206	1.40877	11.0684	4.95496	59.5567	2.02481	3.71537	1.26054	0.127677	36.0899
186_7SA_p	HEALTHY	0.126449	2.86549	17.3388	0.614518	1.14201	6.83042	0.339527	0.0700316	0.819378	0.00162763	0.00538487	6.43965	3.99305	0.0730508	1.30266	2.70761	6.41993	0.748208	1.25583	29.8568	4.21367	0	0.0463562	4.03289	0.0406718	0.0724386	0.763939	1.00486	0.608426	20.5285	12.3452	26.6312	16.9799	2.40488	122.36	1.62506	79.0101	13.4497	6.99818	6.40178	16.7157	13.7352	106.74	7.62074	5.56816	1.42996	1.07334	60.0861
186_11SA_p	HEALTHY	0.0877596	1.36856	8.23644	0.344535	0.612225	3.19056	0.108339	0.051096	0.183805	0.0023859	0.00574256	4.50124	4.71833	0.0368703	0.851603	1.49413	6.88582	0.726147	1.18168	25.7352	2.21767	0.204948	0.824803	5.5109	1.45431	0.232569	0.0310468	1.82203	0.783989	14.0402	8.25785	12.983	2.23684	1.65233	88.7139	1.35034	19.647	3.54476	10.6506	7.15917	13.7869	2.07794	18.9206	0.915102	3.58329	0.983277	0.494168	47.4981
187_2SA_p	HEALTHY	0.164051	3.13265	15.5635	0.885901	0.91356	8.55189	0.652761	0.0176802	1.22127	0.00153258	0.00533425	3.08373	1.71126	0.073144	0.268822	0.910299	3.1406	0.540425	0.529582	15.5316	1.68074	0.629433	0.391471	6.36203	2.02439	0	0.329992	1.84993	0.698834	17.3891	8.62315	13.2058	4.08664	1.21646	43.152	0.770458	27.5346	7.21602	8.16193	5.29453	7.91589	3.24265	33.5402	5.33936	1.85174	0.567425	0.494653	22.3601
187_9SA_p	HEALTHY	0.0347171	1.95399	13.9785	0.371699	0.660367	5.52141	0.355001	0.0527754	1.26599	0.0018477	0.00400153	5.14682	3.24788	0.117123	1.30323	2.80206	15.708	1.19121	2.93042	24.6448	3.73101	0.0891068	0.0384934	2.78981	1.0126	0.0921025	0.784399	0.318507	0.370418	12.1172	6.96492	16.8246	6.34933	2.72081	74.1084	1.12831	51.067	4.89855	8.89733	6.90628	12.2563	3.61578	51.6062	5.62668	4.90803	1.31662	2.03108	28.5283
188_4SA_p	HEALTHY	0.121993	2.43903	15.6833	0.17966	0.649809	5.78913	2.46601	0.0630693	1.86466	0.00156844	0.00396012	6.5716	3.5726	0.161288	1.16889	2.36102	6.0884	1.41838	1.23082	30.5635	4.95896	0.0728847	0.179391	4.301	0.808954	0.240408	0.959639	0.884969	0.409653	15.4075	8.01143	15.3598	4.66291	2.95113	80.5089	1.48123	69.2552	4.17029	4.04405	2.2584	15.1771	7.33213	88.6846	62.9388	5.73261	1.38177	1.35809	64.921
188_8SA_p	HEALTHY	0.0590638	1.73177	16.1279	0.61942	0.674213	5.21168	0.145281	0.0641426	0.438729	0.00474631	0.00661424	5.06991	3.10366	0.0622314	0.822957	1.56694	10.0532	0.476004	1.8416	25.1098	1.87617	0.0933189	0.0459494	4.11772	1.52721	0.0374757	0.349979	0.697148	0.587349	9.95454	6.79492	9.30295	2.46885	1.38614	88.3328	1.34576	50.8669	6.46676	4.50758	0.887583	12.5337	5.44082	50.4786	2.4731	7.16275	1.85254	0.293644	59.9687
189_1SA_p	HEALTHY	0.0221529	2.62891	17.6196	0.315137	0.928019	5.25576	0.571415	0.106581	0.779785	0.0019473	0.00810918	0.642044	0.536487	0.00871502	0.0955765	0.273441	0.916817	0.110069	0.166403	4.70345	0.320762	0.454458	0.678128	5.72845	1.99758	0.0865793	0.0772414	1.99289	0.677095	15.2495	9.23598	11.0447	3.66839	0.271537	15.1927	0.20331	5.58541	0.320751	2.94365	1.33027	1.72276	0.459485	5.01594	0.963161	0.538849	0.172451	0.494542	4.0226
104_DA40_p	ICU	0.0498461	1.87369	7.24249	0.235662	0.374147	5.85771	0.076184	0.0400573	0.667862	0.00245864	0.0052562	10.0515	4.05228	3.6476	1.86666	5.54047	9.42324	3.24231	4.89712	49.0494	7.82194	1.74674	0.928439	25.9834	2.87891	0.032369	2.34835	5.58821	2.32514	87.6055	23.1963	28.3917	11.3126	7.23525	534.341	1.3909	55.2305	5.77398	35.2045	15.5196	11.6495	3.0746	76.1423	3.5264	15.0625	1.90996	5.41605	7.6214
105_DA41_p	ICU	0.0335386	1.08859	4.63948	0.0745324	0.292143	1.68348	0.508813	0.0276317	0.32461	0.00121378	0.00403556	3.28266	2.16337	1.09611	0.70577	1.46531	4.12434	0.87298	2.06821	13.9446	2.34117	0.82557	0.314643	12.8886	1.70542	1.25786	0.770632	2.40991	0.812754	49.6152	11.4054	13.7047	4.21893	2.07069	148.517	0.451834	10.8415	0.703803	4.46839	2.79	4.02172	0.697607	5.46071	3.31876	3.14139	0.747034	1.27331	5.90232
106_DA39_p	ICU	0.041887	1.25679	5.15791	0.0701736	0.287029	2.36359	0.0566031	0.0187636	0.357335	0.000145056	0.00738708	5.80434	3.23456	1.9447	3.42396	9.53754	50.4287	6.09563	24.178	42.4238	15.9166	2.19919	1.03999	20.37	3.0975	0	3.94349	3.87535	1.85012	60.7099	14.3393	14.0737	3.55552	14.3787	522.893	1.49281	27.7679	0.943064	8.78368	3.72578	6.65378	1.85587	19.9494	1.06428	15.6069	1.91544	2.90331	21.2212
108_DA42_p	ICU	0.0385789	1.54084	6.76703	0.623364	0.346783	1.86017	0.196567	0.0405162	0.301121	0.000394092	0.00503278	3.35088	0.770728	0.98109	0.346715	1.23803	2.89883	0.551917	1.4358	9.2413	2.10818	1.09402	0.257899	11.5146	1.53507	3.34842	0.481278	1.20284	0.675423	26.4649	6.19501	7.7404	2.30878	1.86935	157.436	0.308334	17.2998	3.02694	4.64546	2.67054	3.22026	0.876176	6.34818	1.7372	4.25129	0.974412	0.451226	11.2132
109_DA44_p	ICU	0.045704	0.884486	3.7383	0.107491	0.15063	1.62041	0.184524	0.0117326	0.195223	0.000922523	0.0028068	2.88127	0.740345	0.8015	0.379872	0.962144	2.93584	0.479331	1.5875	7.15791	1.44047	1.17095	0.38508	11.0726	1.39264	0.695888	0.422613	1.6821	0.682149	28.7557	7.02374	8.95137	2.65508	1.1855	66.807	0.300065	9.48621	0.841512	4.96576	2.46387	2.85221	0.135206	6.13802	1.45104	2.67403	0.601197	1.36104	6.9894
110_DA43_p	ICU	0.0916697	2.57684	15.0583	0.252052	0.870676	5.54832	0.172857	0.0390558	0.288713	0.010129	0.0160136	0.94806	0.167622	0.168976	0.0963957	0.321477	0.858393	0.261726	0.380745	3.20679	0.594659	1.00251	0.508726	8.58401	1.48526	0.0358353	0.199756	2.33579	0.509527	23.074	7.54198	12.991	11.447	0.518935	28.2125	0.0637216	4.52735	0.150753	2.93439	2.27218	0.901801	0.318712	2.56625	0.156702	1.54003	0.221271	1.50413	1.90515
206_DA24_p	ICU	3.5102	34.3336	138.943	2.60673	2.22304	52.9346	0.428638	0	1.75446	0.245997	0.56343	0.559194	0.342865	0.100611	0.394093	0.808143	4.11617	0.474429	0.949063	3.27004	1.1563	0.24523	0.0962992	3.8297	0.844155	0.559128	0.294296	0.636465	0.257237	10.1319	4.85358	7.99997	2.18887	1.20711	11.781	0.201258	6.1918	0.991437	2.3518	2.1421	2.16144	0.556075	7.06216	3.13319	0.822212	0.143262	0.974124	3.30027
207_DA26_p	ICU	0.312718	7.99009	38.2226	0.170772	0.758577	28.9124	0.16307	0.298916	0.891312	0.0404414	0.0922859	0.256778	0.249099	0	0.134032	0.39218	2.27373	0.158731	0.443613	2.34857	0.37784	0.248293	0.0546359	3.94399	1.70434	0.00599607	0.0982519	0.489592	0.216748	11.6705	8.72111	13.4019	11.2518	0.401128	7.48304	0.135829	1.61257	0.0439028	2.57461	2.27385	1.00995	0.131397	1.44228	0.0649909	1.80611	0.17388	1.08608	1.58586
208_DA28_p	ICU	1.36075	50.6945	189.504	13.165	10.8176	111.508	10.7937	1.91453	19.9081	0.0260705	0.0355749	0.710729	0.524112	0.0571559	0.257948	0.609442	4.55467	0.347093	0.84414	4.59095	0.797101	0.162547	0.0398873	3.97861	1.37716	0.665052	0.154663	0.433158	0.223561	10.0665	6.19936	6.22121	1.86062	0.45678	10.1647	0.333882	6.55	0.425712	1.4421	0.981075	2.68222	0.56042	4.72342	2.54201	1.68412	0.275092	0.311529	4.41263
210_DA25_p	ICU	1.72985	43.1233	157.359	1.65589	8.19001	113.125	2.7886	1.07788	16.6814	0.143268	0.145131	0.823368	0.56003	0.103988	0.422392	1.07014	3.19527	0.687002	0.680974	5.10069	1.92765	0.416345	0.217136	4.41333	1.32093	0.553431	0.684313	1.05041	0.358183	10.6705	4.8903	8.40218	2.21143	1.80423	14.2068	0.306172	5.95896	0.329517	2.4981	1.5432	2.60012	0.262197	3.78743	0.189645	2.57742	0.395748	0.854628	4.92858
216_DA23_p	ICU	31.8743	855.242	3849.93	32.0383	206.74	3678.94	47.6549	40.2681	1036.49	1.51286	2.42209	1.59327	0.904272	0.412223	0.326545	1.01504	5.74047	0.375071	1.1438	15.0276	1.33428	0.255883	0.178795	7.00624	2.12559	0.0398662	0.44701	2.00415	0.967739	29.6444	18.4063	23.826	14.1406	1.39107	30.9369	0.705463	14.1817	0.877046	15.565	9.53604	5.83376	0.406955	13.2117	0.477144	4.6826	0.550921	2.1361	4.60455
218_DA20_p	ICU	1.11446	35.8551	97.368	4.31155	6.30057	81.8987	3.02641	0.938286	11.4714	0.0107752	0.0666198	0.953233	0.794357	0.107097	1.48927	3.58845	4.5066	2.25217	0.68007	7.61283	5.97838	0.387097	0.106708	4.45869	1.31239	0.501796	1.89519	0.627689	0.35934	11.2409	6.43962	4.02691	2.0497	5.54951	38.7899	0.486233	9.64945	1.06734	3.01048	4.71631	3.96245	0.388565	8.25515	0.49423	3.41311	0.48503	0.591432	13.1103
58_DA7_p	ICU	0.127506	2.08504	7.2834	0.184256	0.439274	3.70206	0.0813028	0.0682387	0.42762	0.0410516	0.0187537	0.806653	0.403971	0.443748	0.935588	2.65165	1.3271	1.78447	1.14752	8.31162	4.2725	0.827465	0.850178	4.80401	0.686273	0.071733	0.902614	1.48143	0.357301	7.93653	2.31318	2.50605	0.707012	3.32718	9.19018	0.340093	19.7256	1.50104	0.940954	0.219815	6.81285	1.45402	14.2932	1.33348	2.33655	0.449885	0.274072	1.12429
48_DA2_p	ICU-COVID-19	0.192896	6.07512	38.3401	1.59373	1.67132	19.7158	0.292638	0.147027	2.25302	0.153054	0.0841588	0.765551	0.656515	0.725189	0.965144	2.92259	3.80706	2.11441	3.38294	11.318	4.17953	1.9533	1.69164	13.541	2.08855	0.631831	1.12367	2.23235	0.504968	25.4329	8.36276	10.8537	3.87914	3.95692	15.9303	0.00564309	14.8023	1.41926	3.8921	2.2233	11.764	0.940818	10.4316	0.630438	2.83046	0.566876	0.47393	0.777539
49_DA1_p	ICU-COVID-19	0.536751	12.8668	101.284	3.95214	9.26511	46.5477	0.641043	0.537095	5.9079	0.780325	0.444042	0.390988	0.331003	0.451323	0.669448	1.93059	4.88383	1.14928	4.19973	6.62772	2.91551	1.05824	0.537265	9.95482	1.60311	0.750874	0.720518	1.10823	0.238257	14.2175	4.39841	7.30514	2.94679	2.57086	7.19626	0.00204333	6.92372	0.636277	1.25715	0.635689	3.72751	0.74463	3.44108	0.173746	1.63552	0.436491	0.17165	0.532751
50_DA10_p	ICU-COVID-19	0.101055	2.27432	10.9823	0.255799	0.592102	4.48076	0.0935744	0.036206	0.417753	0.0441657	0.019485	1.35749	0.646701	0.71933	1.11995	3.20265	3.66823	2.37745	3.31003	13.0423	5.11959	0.976399	0.921613	7.04214	1.18361	0.87556	0.907969	1.78812	0.545343	18.0502	5.79154	13.7142	12.9613	4.37782	19.657	0.395797	22.8189	1.56278	2.14353	2.60113	9.89291	1.76192	16.4935	2.21172	4.75942	0.863509	1.03801	1.64658
51_DA5_p	ICU-COVID-19	0.221987	4.25074	24.7812	0.780433	2.11069	8.1481	0.420229	0.132138	1.35231	0.0821353	0.0475575	1.13815	0.762425	1.19054	0.64969	2.07338	1.46456	1.54888	1.25499	12.7479	2.89224	0.932058	0.542702	4.86774	0.6387	0.0797974	0.751726	0.93728	0.33447	12.2211	3.85819	5.6422	1.70488	2.67326	14.9654	0.379215	34.4412	4.25251	1.80943	0.905903	10.2321	3.59141	23.2714	2.66619	3.98392	0.649951	0.176927	1.75179
52_DA3_p	ICU-COVID-19	0.5264	24.5597	113.178	6.44211	3.99422	23.2833	1.12627	0.235883	2.80764	0.44307	0.270864	0.288677	0.20598	0.224028	0.191614	0.608775	0.396998	0.390825	0.388866	3.99646	0.976863	1.3514	0.591838	10.3917	1.76162	0.153293	0.245659	1.43472	0.331968	12.1272	5.68682	8.02669	3.40085	0.730368	3.88455	0.00167737	4.04264	0.82987	2.52571	2.0716	2.52704	0.161744	1.68243	0.15295	0.896386	0.159063	0.423623	0.296957
53_DA8_p	ICU-COVID-19	0.157659	2.16363	11.7598	0.0203223	0.193332	1.01657	0.21663	0.00456361	0.00276851	0.263025	0.160295	0.150321	0.0725768	0.00862304	0.0800604	0.167118	0.177649	0.131602	0.145096	1.47374	0.277281	0.582915	0.249849	6.15278	1.14831	0.0913738	0.0841298	1.36147	0.307811	9.9778	5.88587	11.2548	16.5833	0.284795	2.58387	0.0519849	0.767175	0	0.570699	0.969245	1.40603	0	0.0599908	0.0437975	0.737874	0.135918	0.937006	0.181764
54_DA4_p	ICU-COVID-19	0.296631	4.02378	23.6822	0.169503	0.654313	4.52816	3.92104	0.118976	1.2933	0.12269	0.0772046	0.643169	0.270635	0.24562	0.45861	1.00936	0.866682	0.783524	0.677488	6.69401	1.80072	2.36498	1.40444	14.4942	2.66816	0.334108	0.417626	4.07976	0.840058	24.2177	9.11562	10.9818	4.29766	1.55539	11.207	0.207559	0.328195	0.158042	3.46819	4.59124	5.02939	0.245006	2.41913	4.13485	2.49082	0.524797	2.65432	0.664675
55_DA6_p	ICU-COVID-19	0.10954	2.57364	11.745	0.130152	0.417299	3.08297	1.26792	0.087522	0.612835	0.043566	0.0222581	0.651623	0.393143	0.328982	0.374592	0.942068	0.971039	0.726108	0.769767	7.28455	1.61777	1.24015	0.793175	9.25587	1.43114	1.08981	0.433431	1.73478	0.422924	17.2137	5.48814	9.72078	3.67376	1.49012	8.5382	0.00710774	0.227965	0.341338	3.2269	3.7844	5.23535	0.411169	3.89963	3.49799	2.48353	0.365575	0.963871	0.842686
56_DA9_p	ICU-COVID-19	0.131973	2.00445	7.77429	0.212276	0.295347	1.92269	0.353434	0.0451229	0.299474	0.0348052	0.021084	1.37921	2.27905	0.664367	1.78658	5.5188	2.27359	3.68101	1.82837	21.6149	10.1464	0.591362	0.838936	3.30957	0.0156552	0.572782	2.07409	1.29302	0.453	6.91635	2.62711	7.99421	7.15821	7.95223	20.5968	0.492927	33.8685	1.5111	1.75838	2.3847	13.3697	1.41093	11.0002	2.56914	7.26479	1.08292	2.22902	2.04316
62_DA12_p	ICU-COVID-19	0.134147	2.7068	15.1676	0.388071	0.542037	6.80989	0.234084	0.0924896	2.26087	0.0480002	0.0237886	1.01526	0.648426	0.47902	0.666659	1.45724	11.0522	1.44133	7.83904	9.74853	3.18845	1.22927	0.727715	7.18271	0.977406	0.499916	1.00655	1.11256	0.342412	14.2515	4.54429	7.70746	3.69624	3.18218	45.2401	0.3043	23.9089	2.41185	3.86937	2.48057	8.4028	1.41794	23.3133	2.19566	4.62897	0.451926	0.747443	1.44897
66_DA11_p	ICU-COVID-19	0.113674	1.96552	7.78031	0.127589	0.371655	2.13634	0.154097	0.0137072	0.273979	0.0396977	0.021593	0.839121	0.443549	0.388136	0.479912	1.67387	2.20358	1.55789	1.56053	9.0805	2.92078	1.08294	0.679788	7.17714	1.11377	0.510971	0.815832	1.41057	0.455144	14.1311	4.78599	8.88526	7.18481	3.00626	15.0664	0.272931	16.5943	0.640338	3.0342	6.98854	6.92032	0.997372	5.59048	0.768555	4.00186	0.466296	1.35752	0.898321
74_DA17_p	ICU-COVID-19	0.0808611	2.71708	10.0944	0.120239	0.368631	2.85258	0.277638	0.0502078	0.32818	5.50157e-05	0.00740506	0.796283	0.598012	0.224167	1.75497	4.28953	13.0542	3.09151	4.27389	11.0279	7.13175	0.933815	1.11557	11.5365	3.10034	0	1.43134	4.07541	1.24627	35.2653	17.4961	17.4139	4.74337	5.05379	9.26299	0.463029	12.4102	0.489583	7.16799	5.93286	6.98414	0.707984	8.37149	1.74571	3.91631	0.600531	1.1123	3.61812
80_DA14_p	ICU-COVID-19	0.0792054	2.15952	11.6077	0.0126514	0.151783	1.25841	0.273084	0.024612	0.00223509	0.00687563	0.028536	0.8811	0.248618	0.0984492	0.258304	0.720849	3.95405	0.383104	1.5666	3.50237	0.969123	0.697695	0.323072	8.56983	1.81896	0.0362139	0.264531	2.58104	0.577437	32.9215	12.8581	16.5516	22.6295	0.950405	2.51224	0.120692	1.61801	0	2.09849	1.96521	0.954492	0.0191437	0.193337	0.0904467	2.00036	0.261602	1.68565	2.87424
191_RIA2_p	ICU-COVID-19	0.666136	14.5658	65.8745	1.78549	3.91585	38.66	0.982042	0.509749	3.72279	0.000380993	0.0220013	1.22346	0.888739	0.42199	0.207003	0.576053	2.86915	0.25855	1.03851	0	0.872964	0.46373	0.144599	8.58085	1.75804	0.412362	0.219009	1.43546	0.460801	42.3395	18.8179	13.9598	4.89589	0.521118	30.6705	0.394391	4.80779	0.128634	6.79918	1.82393	4.67506	0	1.59547	0.0395284	5.79806	1.48391	0.468798	4.08099
202_RIA1_p	ICU-COVID-19	0.032983	2.32797	11.6925	0.205655	0.412539	5.88434	0.113172	0.0610359	0.273154	0.000170116	0.00900573	0.89006	0.716929	0.201999	0.219575	0.348593	1.12395	0.173969	0.258084	0.00458102	0.549115	0.160522	0.125878	2.60654	0.531334	0.236494	0.141318	0.683871	0.268377	7.6544	3.25873	4.43542	0.899035	0.446436	21.1921	0.336647	10.525	0.28745	1.3441	0.61888	3.12844	0.358522	6.39162	0.34831	4.28414	0.833239	0.357808	3.92673
212_DA18_p	ICU-COVID-19	2.75202	53.0514	177.671	6.03017	12.0653	0.919139	0.782994	0.889985	11.0647	0.110276	0.0696811	0.442137	0.295694	0.0867626	0.527907	1.31125	4.95586	0.747651	0.875333	2.8427	2.16289	0.236421	0.104803	5.844	2.6484	0.182408	0.506693	1.49411	0.574129	28.5213	22.3616	18.5297	7.168	1.76514	3.2702	0.221872	4.74007	0.239013	3.40961	1.474	1.75941	0.123185	4.34709	0.0923956	1.69741	0.2362	0.404747	1.58236
217_DA21_p	ICU-COVID-19	0.614357	14.153	67.6608	0.48007	2.60603	25.6452	0.436887	0.321212	2.43517	0.009385	0.032202	0.389172	0.29879	0.057874	0.502017	1.21287	2.16434	1.0684	0.37011	2.25237	2.11851	0.277664	0.0882438	4.21647	1.31826	0.1676	0.902235	0.653366	0.288101	10.4724	6.44079	8.88459	2.67889	2.15448	21.437	0.206387	3.30555	0.150835	3.68449	4.44731	1.35719	0.119179	3.52064	5.4583	1.02997	0.169637	2.72362	1.76299
63_5NEG_p	NON-COVID-19	0.184109	4.71442	17.8847	1.35355	1.37999	10.4683	0.675493	0.112036	1.28189	0.0487645	0.0377595	1.55413	0.763623	0.569448	3.15197	8.78332	4.03623	6.66783	3.10514	13.5963	14.6936	0.878981	0.799563	18.7377	2.61199	0	4.0959	2.70427	0.780249	37.5179	10.7658	9.96545	3.27097	10.8164	53.346	0.0172443	37.028	8.94295	2.66981	0.501668	11.5881	3.7756	40.0652	6.52448	2.64163	0.479335	0.0388523	1.74448
71_6NEG_p	NON-COVID-19	0.0884708	2.16649	10.2576	0.270855	0.644481	6.97448	0.10795	0.193151	1.74999	0.0212969	0.0169266	0.880618	0.511659	0.512647	1.03104	2.8754	3.42193	2.27443	2.25468	10.6661	4.86886	1.36888	0.439708	14.5937	2.27197	1.93833	1.60554	1.45591	0.706832	21.6293	6.97232	13.6437	5.11629	4.33704	28.8345	0.0113159	23.3481	2.45676	10.9179	7.11521	9.5079	2.48221	33.7434	1.41004	4.11254	0.482476	2.43759	1.55653
84_16NEG_p	NON-COVID-19	0.0566481	1.94316	10.481	0.371731	1.09015	5.19754	0.20345	0.0334981	0.652872	0.00387096	0.0107731	4.15954	1.18393	0.556274	1.54989	4.02165	13.3467	2.5513	5.03283	20.5913	6.88647	0.283875	0.142559	6.25486	0.871304	0.975172	1.36191	1.02113	0.906211	15.7234	4.38254	2.20857	2.49168	4.84787	9.86023	0.829412	27.2428	2.05221	3.82053	1.75437	4.47152	2.85524	19.7323	1.21172	7.67739	1.65785	0.135143	21.8764
102_12NEG_p	NON-COVID-19	0.0862639	2.2915	16.0529	0.541656	1.59274	10.832	0.278948	0.0593817	2.13657	0.00120327	0.0025436	2.01938	1.03641	0.135732	1.08336	3.10883	12.6692	1.36435	4.02548	5.1652	4.11799	0.559931	0.002138	7.96397	0.887853	0.156969	0.807812	0.553145	0.271634	11.8634	3.0188	6.86433	3.77288	3.21222	5.77193	0.293717	15.8544	2.10316	2.21984	1.56124	1.97322	2.34628	20.3143	1.03045	2.62429	0.319082	0.863338	4.59742
119_19NEG_p	NON-COVID-19	0.0407829	1.4586	5.54315	0.158645	0.607101	3.5046	0.093706	0.0397538	0.205812	0.00138789	0.00165192	4.80295	1.18717	0.32885	1.93926	5.68483	11.1366	2.87456	3.70943	12.8365	8.12213	0.665442	0.249	14.3289	2.8018	0.56013	1.34776	2.28254	1.07626	50.8701	15.2014	14.018	3.78777	4.6708	7.54207	0.645524	24.1412	1.50687	6.83461	2.12786	3.65084	2.65026	22.2332	1.10359	4.27413	0.793546	0.191472	4.54052
155_35NEG_p	NON-COVID-19	0.136863	1.54472	8.21006	0.0664326	0.342032	3.3897	0.171927	0.0491525	0.448011	0.00192319	0.00560696	1.30747	0.993737	0.23616	0.15451	0.523799	1.31447	0.353672	0.368269	8.35669	0.812008	0.831627	0.457958	9.49763	1.98522	0.825835	0.234391	2.40733	0.644725	23.6168	7.477	5.12716	1.54048	0.651568	22.1067	0.394019	11.3043	0.413248	3.59415	1.32097	3.53026	0.751414	12.1686	1.33536	2.85933	0.583005	0.963905	9.83465
158_20NEG_p	NON-COVID-19	0.0738673	2.89738	14.107	0.528048	1.16141	8.18164	0.625241	0.102002	1.49131	0.00286987	0.00983172	1.22569	0.945383	0	0.147072	0.432462	1.08242	0.0566935	0.140168	5.64515	0.651787	0.490881	0.313849	4.99618	1.71768	0.117048	0.0945063	0.848115	0.394536	10.9262	6.18399	4.64335	1.23812	0.387613	23.5592	0.438141	15.0892	3.46707	2.09081	0.634793	3.87233	2.48551	25.4564	4.4934	57.2474	9.58754	0.390176	9.90369
158_28NEG_p	NON-COVID-19	0.0793185	2.57758	7.97791	0.282738	0.772766	10.3845	0.315002	0.0344984	1.1101	0.000936617	0.00268523	4.18216	2.58656	0.17553	1.38102	2.60921	4.97646	1.13145	1.09751	21.5695	4.09969	1.04025	0.572158	14.4691	2.94656	0.0969099	0.605947	3.18205	0.965748	39.1604	16.0469	11.7447	1.81891	2.83707	77.5663	1.2282	38.2058	6.68199	9.33232	2.1273	12.6051	6.61153	83.0034	7.96692	4.32126	0.944654	0.270796	40.5927
159_22NEG_p	NON-COVID-19	0.120266	2.07199	9.29205	0.238028	0.562202	2.42368	0.208951	0.0324594	0.50832	0	0.00425167	1.36717	0.962652	0.073315	0.0674634	0.245664	1.52417	0.0732647	0.279258	6.86428	0.296425	0.233017	0.129772	6.39304	1.39737	0.627538	0.0334794	0.926202	0.34046	26.8273	10.9678	9.35682	1.92454	0.205636	22.33	0.412332	11.8962	1.39239	2.75325	1.11125	3.55892	0.950282	10.1935	1.50213	1.96572	0.41574	0.627816	11.1056
165_46NEG_p	NON-COVID-19	0.00454402	1.14171	5.32039	0.263188	0.4269	4.1866	0.0942542	0.0323503	0.270425	0.00116717	0.00469947	13.3217	11.1339	2.455	3.4947	5.68648	12.141	1.93068	5.32991	102.895	7.24453	0.436848	0.742963	23.9704	3.69746	0.349674	1.60193	3.47662	1.1239	69.959	24.6725	17.0512	0.291824	5.5825	132.663	4.38852	150.628	21.3678	13.3161	0.639698	36.8049	15.902	188.602	9.22166	29.1627	7.44886	0.675504	94.0162
172_37NEG_p	NON-COVID-19	0.00394114	1.37416	6.5131	0.202236	0.706351	6.34437	0.226262	0.0675139	0.947771	0.00312416	0.00466762	1.53782	0.865611	0.0689336	0.157089	0.671491	1.41711	0.177781	0.369222	6.82193	0.820492	0.349188	0.103582	8.01009	1.4514	0.0941374	0.11302	0.454716	0.308658	18.8156	7.10905	8.10026	1.82363	0.550912	15.449	0.417814	11.4202	0.838034	3.54221	1.48194	4.03718	1.30113	19.4032	1.30395	1.93545	0.489127	0.742211	5.73042
174_21NEG_p	NON-COVID-19	0.0130159	0.919422	2.61771	0.048673	0.11899	0.413452	0.0167499	0.0130413	0.0646953	0.0106509	0.013686	2.24746	1.6381	0.123662	0.420217	0.799707	2.81293	0.371512	0.665298	15.304	1.23278	0.652758	0.647783	9.66102	1.6842	0.0234938	0.259296	1.86495	0.646868	30.3145	12.0806	12.1944	2.69507	0.947656	39.9678	0.714352	11.0179	0.401365	4.30461	1.99106	6.3222	0.195544	1.47481	0.201033	4.10263	0.864646	1.6323	23.8017
177_26NEG_p	NON-COVID-19	0	0.709567	5.74762	0.0696556	0.233869	2.42111	0.0252439	0.0219258	0.168097	0.00240769	0.0139736	1.81915	1.13408	0.169797	0.814763	1.77906	1.67993	1.95004	0.409009	10.1499	3.54931	0.493519	0.169761	6.48118	1.0839	0.186008	2.73188	0.862307	0.427303	11.0952	4.76675	4.27008	1.70993	7.75407	17.942	0.518962	10.5587	0.329848	5.3536	2.03728	5.20041	0.536159	6.08032	0.216126	3.81333	0.58415	0.834981	12.6067
179_29NEG_p	NON-COVID-19	0.00749185	0.842778	6.44898	0.0644612	0.230112	2.58741	0.0511171	0.0174327	0.276001	0.00598515	0.00595243	2.66606	1.60642	0.139405	0.427972	1.77522	2.53356	0.397124	0.516284	13.4098	2.90481	0.343282	0.107205	5.59347	0.926342	0.123425	0.182717	0.445586	0.159408	11.8028	4.90939	7.29613	1.09014	2.91725	33.8311	0.780838	22.1748	0.716546	2.00338	0.38743	7.20901	1.35277	17.2212	0.654599	2.82104	0.700152	0.237342	29.6849
180_32NEG_p	NON-COVID-19	0.00287607	0.641831	4.51709	0.0144931	0.067503	3.12262	0.0143534	0.0287998	0.137808	0	0.00258995	4.74329	2.07919	0.439218	0.609339	0.788534	2.77777	0.342408	0.60265	15.9574	1.26429	0.703202	0.508475	9.15978	1.49161	0.0456422	0.348992	2.5226	0.881779	19.4816	8.02963	10.5435	3.73218	0.983013	30.8914	0.909719	29.2751	0.293335	7.74523	4.01079	11.7306	0.637318	22.2145	0.410785	3.63073	0.749556	0.632957	16.9334
181_30NEG_p	NON-COVID-19	0	0.858073	5.93166	0.144045	0.25316	3.08327	0.0669085	0.007568	0.285488	0.00484084	0.0186682	2.53139	0.792323	0.148829	0.194081	0.446549	1.63007	0.220763	0.332235	6.12995	0.661731	0.546453	0.0106286	5.76701	1.70038	0.74412	0.137119	0.727778	0.324248	13.1528	5.01055	7.92184	1.53781	0.413014	19.1992	0.318364	14.4749	0.567946	4.05102	2.42288	5.88397	0.624982	7.29901	0.446055	1.05961	0.247513	0.151813	16.6047
[truncated: 419 more columns]

## Sheet: Quantified ESI -
	Lipid concentration (expressed as nmol/mL of plasma) in each sample
Metabolite name	type	FA 16:4	FA 18:1	FA 18:2	FA 20:4	FA 22:6	FA 44:5	LPC 14:0	LPC 16:0 [M+HCOO]- & [M+CH3COO]-	LPC 16:1	LPC 17:0	LPC 18:0 [M+HCOO]- & [M+CH3COO]-	LPC 18:1 [M+HCOO]- & [M+CH3COO]-	LPC 18:2	LPC 20:3	LPC 20:4	LPC 22:5	LPC 22:6	LPE 16:0	LPE 18:0	LPE 18:1	LPE 18:2	LPE 20:3	LPE 20:4	LPE 22:4	LPE 22:5	LPE 22:6	LPE O-16:1	LPE O-18:1	LPE O-18:2	PC 32:1|PC 16:0_16:1	PC 34:1|PC 16:0_18:1	PC 34:2|PC 16:0_18:2	PC 36:1|PC 18:0_18:1	PC 36:2|PC 18:0_18:2	PC 36:3|PC 18:1_18:2	PC 36:4|PC 16:0_20:4	PC 36:5|PC 16:0_20:5	PC 38:4|PC 18:0_20:4	PC 38:5|PC 18:1_20:4	PC 38:6|PC 16:0_22:6	PC 40:6|PC 18:0_22:6	PC O-34:3|PC O-16:1_18:2	PE 34:1|PE 16:0_18:1	PE 34:2|PE 16:0_18:2	PE 36:1|PE 18:0_18:1	PE 36:2|PE 18:1_18:1	PE 36:3|PE 18:1_18:2	PE 36:4|PE 16:0_20:4
8-05-20_98_n	COVID-19	1.09035	3.74959	1.16926	0.706099	0.21079	0.857255	0.809612	157.92	3.01268	2.11542	38.9417	28.5784	14.9617	1.62287	7.79116	0.369525	2.55528	3.45808	4.42013	4.71148	4.66591	0.44373	8.44271	0.209599	0.521713	6.21878	0.314582	0.389709	0.165405	5.15313	72.9939	88.4905	8.93019	29.9983	12.9988	35.6845	2.18328	15.1993	5.35223	20.3133	4.20434	1.23964	1.95154	2.05419	0.860431	3.00127	0.73537	4.97958
8-05-20_104_n	COVID-19	1.60285	4.73689	0.968615	0.701431	0.272643	1.28792	0.879028	211.456	3.25907	1.84296	51.0324	29.0049	5.20966	1.65519	6.65649	0.431219	1.99838	6.01885	7.00258	2.79295	0.402218	0.0570704	0.961991	0.0345867	0.0981025	1.22071	0.416873	0.368272	0.171738	10.507	157.548	125.135	17.269	45.5568	34.4214	83.7381	3.04366	43.3079	13.8626	42.6506	14.5649	0.777596	6.21863	4.1026	2.89715	4.553	1.00232	6.49704
8-05-20_106_n	COVID-19	1.80908	3.35442	2.54183	0.468812	0.506255	0.888034	0.574074	171.926	1.47278	2.20528	54.5256	25.5943	16.7551	1.04081	5.58734	0.351525	2.62816	4.24803	6.76069	2.88649	3.03541	0.198507	3.49464	0.0336542	0.234837	4.76992	0.297168	0.363863	0.100995	3.17783	112.279	218.581	16.1959	99.178	23.3326	70.0128	4.8759	40.983	10.1967	41.7371	16.9184	2.10925	3.72506	8.55256	2.49601	11.7841	2.7782	8.05506
8-05-20_108_n	COVID-19	1.26956	2.48482	0.796835	0.497461	0.12769	1.12056	1.91919	243.369	4.6869	2.56025	69.8367	45.434	14.2399	2.45564	8.01034	0.477125	1.38832	3.64855	5.34331	3.09796	2.05979	0.339117	3.45807	0.169984	0.358898	2.14657	0.646698	0.684898	0.35939	9.03457	135.122	131.551	22.702	56.5059	34.9607	56.8941	3.62826	28.0056	11.5746	18.9802	6.33136	1.48189	2.24151	2.91189	1.0046	4.47295	1.1838	4.5374
8-05-20_109_n	COVID-19	1.32269	2.59329	1.22415	0.1844	0.12094	1.04594	0.485834	107.695	1.50981	1.13264	39.5311	19.4262	17.1532	1.2268	3.56053	0.17623	0.984315	1.8714	3.07766	1.94819	2.29017	0.232984	2.00817	0.0812809	0.131318	1.71841	0.240507	0.26104	0.0823645	4.42515	84.1066	185.657	12.8169	87.5858	29.3563	47.7757	1.07054	26.3198	7.91301	25.028	8.3019	1.4028	2.45693	4.79305	1.8225	8.05545	1.85912	4.57556
8-05-20_111_n	COVID-19	3.04527	3.51118	0.89693	0.432649	0.405833	1.1871	0.377721	133.269	1.5795	1.22748	28.9152	23.5589	11.1344	1.28206	6.30044	0.217824	1.94803	3.25331	3.22377	3.03608	2.19498	0.210204	4.76802	0.0443595	0.225527	4.16718	0.213829	0.206999	0.0840513	9.6221	222.609	248.309	22.5702	85.0955	42.7135	137.493	7.67842	65.4488	14.8507	59.5715	17.1885	1.06743	5.36584	6.75001	2.33481	7.93636	1.67187	13.56
8-05-20_AA_n	COVID-19	0.464045	1.09171	0.284306	0.134642	0.0428222	0.813354	1.0388	150.023	3.66909	1.47243	48.0678	38.5977	25.0487	2.22698	8.54632	0.334886	1.08715	2.7041	3.23417	3.0373	3.28307	0.316506	3.7971	0.106326	0.174114	1.61896	0.329341	0.432878	0.100319	4.56518	63.952	95.9311	11.3333	37.5149	20.2729	67.5356	2.99758	22.8711	11.4953	18.3265	3.40382	1.37117	0.799126	1.7245	0.490469	1.85095	0.758354	3.57215
8-05-20_RI_n	COVID-19	0.955573	3.79106	1.08577	0.455593	0.251815	0.839351	0.374761	146.858	1.6186	1.21629	33.7534	21.0184	4.55436	0.954071	3.06123	0.210979	0.977773	3.15282	3.46924	2.05849	0.853526	0.11423	1.44423	0.0317811	0.128776	1.94969	0.302562	0.189676	0.132711	7.47903	130.931	174.083	14.4463	50.7003	28.6046	55.9497	2.25406	23.1723	8.77363	28.2202	9.78767	1.01526	3.44499	4.06286	1.43151	4.68729	1.02476	5.85055
11-05-20_2POS_n	COVID-19	1.38796	0.990902	0.436455	0.130777	0.0700553	1.06116	0.561353	65.909	1.60279	1.12909	20.8469	14.6622	9.23058	1.08459	3.19365	0.0799001	0.641265	1.73958	2.49166	1.79463	1.3999	0.146117	1.6548	0.0240666	0.0718783	0.923477	0.396599	0.470149	0.16902	8.3529	113.698	160.236	17.135	68.1715	42.2288	63.9703	4.66363	29.4955	8.58021	23.6777	6.78144	2.05417	3.84601	7.26041	1.90936	9.8302	2.80535	9.36658
11-05-20_3POS_n	COVID-19	0.513015	4.5089	0.937638	0.250504	0.10465	1.07428	0.038357	12.6675	0.30681	0.099515	3.05467	4.04416	0.517721	0.0220505	0.250055	0	0.0192917	0.570863	0.761611	0.39895	0.0799305	0	0.124091	0	0	0.0772942	0.0248173	0.0555342	0.0540697	8.40434	87.4596	71.0333	9.96117	30.2596	9.45056	26.9882	0.488273	15.633	4.74247	6.96819	2.46174	1.29636	2.67477	2.91002	1.34952	3.70422	1.00187	4.94076
11-05-20_4POS_n	COVID-19	3.15067	4.54025	1.39058	0.496866	0.180065	1.18442	0.908481	191.728	2.7175	2.08461	61.9939	36.3908	5.62161	0.616065	2.68821	0.0688129	0.469455	1.75024	3.17146	1.68292	0.668664	0.0605639	1.08511	0.0460133	0.06968	0.650775	0.263719	0.242001	0.127796	15.4805	269.158	308.885	44.9818	134.842	55.6843	117.633	2.73046	55.4469	14.5149	33.2485	11.4949	4.48158	5.40358	9.00374	3.04594	12.059	3.65082	9.67687
11-05-20_6POS_n	COVID-19	1.37146	3.80953	1.21323	0.300292	0.16018	0.899986	0.170721	60.1597	0.954461	0.502788	12.5782	12.034	2.58084	0.472126	1.56648	0.0943779	0.537823	1.81923	2.12637	1.55623	0.649521	0.0743409	1.02975	0.0372915	0.0954831	1.28005	0.354537	0.288899	0.182131	7.60185	122.3	119.215	13.4257	40.8516	20.8286	38.9684	1.33725	15.2601	6.43646	19.5271	7.2029	0.629525	4.10138	5.32836	1.84019	6.13695	1.45657	6.34624
11-05-20_9POS_n	COVID-19	1.11076	1.19836	0.339187	0.158639	0.0593541	0.626775	0.852318	133.478	3.13476	1.48418	42.6335	36.1113	21.0398	1.94637	7.48148	0.284074	0.963358	2.33704	3.14861	2.84719	2.67843	0.279509	3.21956	0.0961502	0.149678	1.38099	0.377248	0.486777	0.149175	5.78788	98.8029	127.891	14.4409	56.9019	28.571	69.2178	2.47101	36.1868	11.8859	16.9899	5.19209	1.99472	1.26062	1.68004	0.645455	2.87209	0.772802	3.53269
11-05-20_12POS_n	COVID-19	1.16337	5.04261	1.00415	0.657651	0.195161	0.708683	0.370823	110.925	1.40835	1.44874	24.4292	22.304	5.25994	0.974545	7.54189	0.178728	1.14224	3.15268	3.43133	2.46565	0.733268	0.145092	2.47094	0.0796785	0.111143	1.60586	0.248416	0.257055	0.146806	3.28274	113.988	93.8045	10.6209	28.9345	24.1927	99.2867	2.4027	47.9427	11.6123	26.9977	7.70044	0.659039	4.48392	3.61565	1.4844	3.64865	1.16	9.06071
11-05-20_13POS_n	COVID-19	1.28719	6.32028	2.37937	1.35336	0.46998	0.710748	0.620713	131.07	2.51157	1.26615	28.9819	22.2261	12.8662	2.73862	8.61108	0.323348	2.51176	2.17831	3.5484	2.9931	3.17512	0.66594	8.59891	0.278869	0.477257	7.53032	0.700901	0.750565	0.34111	6.60479	88.05	130.108	8.99715	41.5367	34.2196	76.3667	2.833	30.6237	8.38177	25.5896	7.0159	0.780324	1.9102	2.13586	0.841765	2.69496	0.621196	4.42187
11-05-20_93DLMC_n	COVID-19	1.63681	1.49499	0.415654	0.171228	0.0640095	0.947556	2.90249	261.443	4.93973	3.45849	83.9012	44.8507	31.084	4.13095	9.80931	0.417602	1.46985	2.84652	4.4442	3.11306	3.38374	0.494721	3.19771	0.10125	0.202379	1.91048	0.843355	1.20088	0.287618	9.70326	125.51	210.464	21.9957	85.3174	70.649	103.958	9.07041	44.8407	15.1253	26.4621	8.76917	2.51519	1.21337	2.25979	0.979053	4.29483	1.11502	3.65808
12-05-20_8POS_n	COVID-19	1.09231	3.51919	1.1879	0.527443	0.152957	0.771232	0.318693	84.313	1.37907	0.746331	14.0505	16.9177	10.0461	1.33789	8.25223	0.34728	1.80991	2.31277	2.63751	1.94627	1.96153	0.206558	5.3067	0.0963236	0.306273	4.29076	0.323243	0.297586	0.15014	4.06731	70.9925	112.423	5.48166	20.7773	17.3656	59.4367	2.52805	18.3061	6.05478	15.5351	2.69932	0.846643	1.8869	2.98122	0.681854	3.00828	0.619493	5.97265
21-04-20_4_n	COVID-19	2.69032	2.24474	0.554718	0.155556	0.109566	1.25499	0.198874	38.9556	0.905686	0.420731	8.98675	7.16514	2.14	0.244349	0.837278	0.0294889	0.2433	1.40982	1.73064	1.08676	0.657391	0.069234	0.860573	0.0163859	0.0661197	0.856269	0.051356	0.116354	0.0210298	18.0315	174.89	178.36	30.9735	71.0103	32.969	61.3262	3.87475	22.9289	7.52292	23.651	6.75191	0.859419	8.89467	10.6693	3.81357	15.0018	4.38718	16.2907
21-04-20_9_n	COVID-19	2.0583	1.28376	0.476641	0.236308	0.112255	2.18758	0.687858	97.5816	1.73031	1.20753	32.9368	17.4055	11.2057	1.67945	5.03969	0.320937	1.18104	2.0344	2.91953	1.35954	1.27042	0.156409	1.76222	0.0367187	0.145893	1.5388	0.308526	0.299792	0.0797292	4.40834	66.9178	89.2007	11.0854	40.8766	28.4499	46.2394	2.93671	26.0511	8.03751	22.0279	7.84094	0.65166	1.37253	1.6079	0.841506	2.73214	0.367045	2.65174
21-04-20_12_n	COVID-19	2.38271	4.50509	1.24767	0.751991	0.211885	3.06415	3.37725	242.31	8.3341	3.31994	55.2034	58.622	35.7924	6.23428	13.8535	0.983698	2.85275	4.99155	5.67365	11.5386	12.7764	1.73902	14.767	0.932476	1.36081	7.87831	0.942865	0.995933	0.448844	14.1652	135.498	167.568	20.4628	56.1176	47.9581	64.6075	5.68771	19.0694	10.8791	19.2811	3.66248	1.13673	2.25842	2.42511	1.14684	3.6894	1.55701	2.95005
21-04-20_14_n	COVID-19	1.97232	1.93033	1.15957	0.401771	0.14931	4.72185	0.707429	88.5171	2.09808	0.895994	38.5374	18.6046	11.58	0.79677	1.7137	0.0928397	0.207049	1.71832	4.13229	2.16819	2.38756	0.115272	0.978002	0.0791808	0.080064	0.315535	0.712707	0.808345	0.265679	15.3837	86.2727	160.937	21.4063	92.6128	26.9705	40.3367	2.06507	21.8481	6.50705	6.61366	2.40559	4.48788	1.49382	3.72686	1.77221	8.4939	3.06651	2.50102
21-04-20_20_n	COVID-19	4.37608	3.59482	1.33534	0.844879	0.480927	7.53338	0.292461	96.9716	0.824814	0.962371	26.5157	12.6288	7.42044	0.618864	6.44169	0.184694	1.19961	1.40377	2.09172	0.666465	0.516558	0.0213877	1.11609	0.0187251	0.0564725	0.89039	0.467412	0.402302	0.190485	2.39437	66.6493	110.019	7.67108	36.2165	15.5999	89.5981	2.66586	39.1171	7.76045	33.816	10.0016	1.61502	1.05376	1.22471	0.444464	1.58005	0.24742	2.75472
21-04-20_24_n	COVID-19	2.45217	3.09743	1.31167	0.339224	0.32289	1.27851	0.277007	71.1093	0.767699	1.02399	21.1228	14.0083	7.1211	0.334641	2.83012	0.117305	0.759779	2.43274	2.95452	1.0312	0.915636	0.050935	1.24901	0.0140161	0.0758568	1.77282	0.384614	0.401166	0.148727	2.51138	66.6902	114.493	10.0045	41.7374	14.006	55.9435	2.69093	26.7563	7.51804	29.0181	7.16059	3.39642	1.44369	2.9303	0.731077	3.40107	0.89824	4.75205
21-04-20_26_n	COVID-19	2.47593	3.0997	3.13129	0.799731	0.718966	2.78787	1.3539	186.097	2.92385	2.43128	57.0607	29.5559	47.1098	2.29102	12.1387	0.409709	4.20063	4.38131	9.0889	3.08266	5.98471	0.331895	6.98905	0.187093	0.354806	7.99072	1.9447	2.3304	0.687476	2.53795	40.9948	168.707	7.42442	47.9643	20.1428	62.7516	3.47543	17.1499	6.84921	34.4366	7.6362	1.43714	1.21411	3.39987	1.46198	4.4502	1.37177	5.00736
21-04-20_27_n	COVID-19	2.57089	4.19396	0.954233	0.657185	0.225472	2.89311	0.702242	164.626	2.74467	2.07614	40.4913	25.0418	7.28663	1.47828	10.2858	0.438461	1.48604	4.27549	5.58264	2.17453	0.883232	0.158311	2.69062	0.0988855	0.259094	2.34818	0.549268	0.494942	0.224014	7.1458	104.396	107.74	12.7619	36.543	28.9137	95.0637	4.50344	42.3503	12.3933	30.2819	7.6116	0.587586	3.03497	2.26649	1.40624	3.25649	0.542185	6.02594
21-04-20_31_n	COVID-19	2.0581	4.35085	2.28649	1.39434	0.614792	3.98459	0.612047	157.072	2.03579	2.60899	52.0191	28.4424	17.6432	3.56392	16.0345	0.529077	4.39287	2.11652	3.32112	3.13082	3.07797	0.695041	7.96153	0.206786	0.370528	6.60616	0.568646	0.783095	0.248184	1.69394	60.2127	79.7021	9.65996	33.9633	23.4593	66.8843	2.59167	36.6553	7.78197	25.8677	8.23237	1.29349	0.656914	0.569126	0.386	0.961929	0.202475	1.37579
21-04-20_34_n	COVID-19	2.76856	4.98113	2.39691	0.860563	0.835019	4.28058	2.74343	233.382	5.40248	4.49118	85.7413	47.1312	40.6225	4.65193	14.0335	0.96379	5.39562	4.49143	7.00369	6.04638	9.88485	0.965407	9.30579	0.45603	0.871749	10.2746	0.79214	0.752603	0.338839	6.48217	90.6201	151.102	21.0642	75.7228	38.9551	68.7432	7.93042	32.9617	11.6224	38.9947	13.9572	1.95493	1.16988	1.99441	1.15449	4.53495	0.816046	2.59442
21-04-20_36_n	COVID-19	2.71387	2.55914	0.69003	0.635557	0.296266	1.13522	0.678116	126.969	2.89603	1.50777	42.4739	22.9854	9.15145	1.61927	7.64695	0.226021	2.11547	2.26759	3.38007	1.68723	0.781383	0.151584	1.89775	0.0266008	0.0965162	1.93551	0.433381	0.465072	0.22402	5.60129	82.1689	108.321	15.5627	53.4164	30.4715	72.5499	4.63126	38.029	8.53348	35.1307	12.1742	0.699662	2.18704	1.76386	1.06355	3.1186	0.630622	3.90878
21-04-20_38_n	COVID-19	1.96811	6.01288	5.07083	0.832498	0.671207	3.55152	0.491357	127.7	1.62604	1.56068	45.266	24.4575	30.0079	3.05632	6.80819	0.339387	3.65875	1.88244	3.61773	2.56127	6.9088	0.709759	6.79217	0.185849	0.310318	6.79042	0.273195	0.290935	0.135457	1.1996	43.092	117.981	7.51528	54.4821	22.1388	31.1353	0.928216	16.439	4.20773	20.236	6.34153	0.787892	0.686572	1.77746	0.522261	3.19063	0.668486	1.38675
21-04-20_39_n	COVID-19	2.53072	2.17986	0.606688	0.490877	0.209934	1.6294	0.376813	86.2308	1.3388	0.93713	25.258	17.7928	8.33049	0.87535	6.35447	0.165846	1.37247	2.12587	3.20355	1.64015	0.998802	0.11823	2.56552	0.0530006	0.0976765	2.43559	0.346308	0.380676	0.179709	3.22741	71.47	78.6163	10.925	35.9859	16.3855	56.0509	1.86579	28.7163	6.00368	20.8427	7.71482	0.661906	2.07902	1.79525	1.02165	3.02556	0.544651	4.35073
21-04-20_40_n	COVID-19	2.11326	1.86934	0.882325	0.343953	0.235325	4.71275	0.998253	153.442	3.12253	2.47732	45.1103	34.641	24.2205	1.97236	9.50192	0.334985	2.90933	1.98228	2.76964	2.74994	2.38193	0.195015	2.90248	0.0503782	0.129919	2.4022	0.663302	0.768747	0.303631	2.2238	61.1152	87.914	11.309	40.8347	18.8407	47.0454	4.28079	20.906	6.57365	24.7996	6.01698	1.30625	0.602633	0.850954	0.741997	1.98769	0.665507	1.28279
21-04-20_41_n	COVID-19	2.72191	4.61593	1.17419	0.731509	0.503575	2.22678	1.15692	176.379	3.71044	2.35967	44.8843	31.7006	18.8973	3.38043	11.5426	0.518149	3.76448	3.8523	5.84538	2.79684	2.52495	0.468346	5.87241	0.116419	0.376185	6.97582	0.37371	0.432627	0.166929	6.07909	106.094	132.571	15.7001	50.8827	36.9179	69.3364	7.15671	28.9604	8.35134	36.8078	10.1267	0.601125	2.63413	2.79353	1.54058	5.71964	0.722874	6.18659
21-04-20_42_n	COVID-19	2.37147	3.45459	1.20361	0.599057	0.542041	2.14029	0.981801	114.832	3.09621	1.79707	30.2439	25.5151	13.2874	1.64051	4.64547	0.276506	1.9129	3.17313	3.52562	1.69049	1.39947	0.190634	1.60279	0.0313386	0.110425	1.96108	0.334318	0.302851	0.220335	3.26129	65.368	74.2885	12.7206	33.453	19.2806	29.1789	3.16715	13.3281	5.95059	21.8726	6.15975	0.92481	1.25345	2.1592	0.633706	3.24367	0.938791	3.91331
21-04-20_43_n	COVID-19	2.6209	1.67244	0.586453	0.22162	0.118572	1.64434	1.81108	140.655	2.91048	1.73382	46.3328	26.9342	23.1337	3.92933	5.92581	0.226296	1.42824	3.38749	4.87989	5.29693	2.91162	0.368041	2.06295	0.120252	0.107945	1.4779	0.568805	0.596089	0.232407	5.90593	71.7425	147.43	16.9995	74.8612	52.2086	53.5795	2.58944	25.7852	6.83088	21.048	6.53448	1.2987	3.67821	5.48115	3.93505	12.5705	3.41333	4.93469
21-04-20_44_n	COVID-19	2.39133	2.035	0.800208	0.546502	0.237903	3.40597	1.05876	206.196	3.84503	3.03172	47.2568	37.613	16.2935	2.6705	10.3332	0.502836	2.65009	5.32095	6.10819	3.3386	1.82499	0.232694	3.12279	0.0942206	0.218986	2.55212	0.527882	0.706633	0.298151	4.18736	99.4834	137.468	12.9849	44.8762	35.4965	66.2799	2.77446	24.6405	10.4919	32.414	6.72419	1.28396	4.28062	4.20354	1.70561	5.21229	1.5922	6.30679
21-04-20_46_n	COVID-19	0.435914	1.45484	0.574334	0.25796	0.19329	8.17814	0.386697	72.3141	1.01755	0.837869	20.6831	14.4487	14.7217	0.96244	5.69325	0.235771	1.73887	1.34775	1.60654	1.38016	1.69979	0.113507	2.34403	0.0408958	0.120914	2.55719	0.166332	0.213597	0.0551777	2.50129	51.9294	91.3478	8.14989	35.6455	14.8179	44.2479	2.18122	20.5257	4.8584	23.5509	7.14619	0.557388	0.689049	0.872619	0.455739	1.48175	0.263292	1.60992
21-04-20_47_n	COVID-19	2.24791	1.54399	0.595931	0.804344	0.363688	4.48125	0.896697	171.929	2.32087	2.32577	40.2632	29.0199	11.3553	2.1984	10.6435	0.502124	2.89822	3.79038	4.6005	2.51717	0.819623	0.123581	1.90539	0.0295617	0.144992	2.1024	0.444555	0.454731	0.197848	4.72192	128.743	141.97	17.8736	51.2361	37.6859	88.1574	8.55099	36.6577	11.4489	42.3155	12.0156	1.68858	4.53605	3.27377	2.5713	5.01317	1.17859	6.53346
21-04-20_48_n	COVID-19	2.8109	7.87576	3.26498	0.959167	0.884399	3.11211	0.846501	334.674	3.45401	4.501	81.0859	60.0347	37.9597	4.21167	14.6002	0.858887	4.19736	13.9165	18.8715	10.1257	10.9489	0.946201	15.3082	0.479577	1.16923	13.2206	1.04104	1.26541	0.535905	2.51574	113.111	167.042	16.6187	55.5347	37.485	65.0371	9.98724	20.3258	10.7942	32.5053	5.54014	1.27858	4.27248	6.86796	2.42786	10.3852	2.88635	10.9556
21-04-20_56_n	COVID-19	1.90668	7.77903	2.98323	1.30754	0.382694	5.07785	1.60678	146.977	4.16263	2.00974	40.5481	42.9305	27.3762	2.67637	5.82631	0.312021	1.31143	4.76392	5.74227	13.5109	18.1588	2.25292	15.2223	0.705718	1.04948	7.54437	0.303912	0.372648	0.186326	10.2489	121.113	157.192	22.8758	66.5379	34.4389	51.7	3.38863	17.1783	8.23682	14.5437	3.39308	2.66906	3.99035	5.06256	2.1308	7.98756	3.05303	5.03218
21-04-20_61_n	COVID-19	0.670856	1.55317	0.698221	0.522728	0.175619	1.2316	0.364219	85.037	1.36634	1.01028	22.1695	11.6755	6.74651	0.814562	5.93778	0.164432	1.25448	1.13664	1.78878	0.826087	0.560866	0.0527814	1.42027	0.0910143	0.0591594	1.04976	0.285896	0.303122	0.11398	3.35435	58.9536	94.1883	7.43753	33.9234	18.2672	61.6726	1.31253	29.3128	5.03692	23.217	7.5532	0.682252	1.02778	1.10979	0.464349	1.54724	0.277195	2.39275
21-04-20_63_n	COVID-19	0.445794	1.50127	0.850547	0.278397	0.230809	0.985077	0.261333	87.3152	1.19119	1.14134	29.8989	17.0656	24.1168	1.68647	11.0079	0.31382	3.5357	1.85178	2.94514	1.67895	2.39478	0.163719	3.65264	0.0340417	0.137983	4.16835	0.236808	0.356323	0.091649	1.83141	42.8968	104.003	7.36787	44.8647	15.575	58.0874	3.07848	28.2411	5.22556	29.459	9.24893	0.794802	0.801891	1.45652	0.538346	2.57737	0.47871	2.41976
21-04-20_64_n	COVID-19	0.820085	3.91614	1.31933	0.628011	0.320176	1.14685	0.389149	101.285	1.3841	1.286	27.5205	21.9084	9.44121	1.05606	7.95674	0.265264	1.40965	1.74579	2.99552	0.98563	0.790893	0.0883698	2.08177	0.0567868	0.107683	1.75258	0.337741	0.398779	0.190329	2.4696	78.9574	97.7581	9.46281	35.8913	18.9053	73.6579	3.37501	36.0945	8.13694	25.0868	6.21146	1.57002	0.930602	1.21717	0.500376	2.06909	0.330985	4.03245
21-04-20_66_n	COVID-19	0.579884	1.96751	0.790021	0.356413	0.20642	3.53623	0.314216	88.7734	1.11046	0.601933	23.3806	13.9098	7.34098	1.15471	3.639	0.150153	1.03079	2.0753	2.90734	1.6643	1.19157	0.116176	1.64766	0.0447013	0.0762684	1.30871	0.168141	0.175164	0.0623829	3.69466	67.9265	102.247	10.5111	40.9808	23.1112	40.1534	1.30406	19.5604	4.40311	18.6385	6.29086	0.577206	2.47665	3.08637	1.52768	4.37551	0.831205	3.95607
21-04-20_67_n	COVID-19	0.489748	3.5447	2.28857	0.414014	0.461174	0.645992	0.333605	67.9501	1.00932	0.791409	25.0137	14.6796	6.79229	0.321753	2.51321	0.0742827	0.630869	1.91126	3.75989	1.34303	1.14771	0.0467941	1.19746	0.0357344	0.0615747	1.08606	0.318536	0.296338	0.141751	3.42481	58.8029	116.54	11.8735	58.1978	12.4814	43.6145	1.57216	28.446	5.31219	17.0029	6.4495	2.71022	1.9296	4.27276	1.58825	7.35567	1.50262	4.23712
21-04-20_68_n	COVID-19	0.359749	1.07466	0.425227	0.321866	0.0914329	6.96671	0.671099	64.6338	1.40144	0.657804	18.5019	11.4771	5.86876	0.853108	3.5527	0.129588	0.456132	1.8933	2.07192	0.901299	0.634627	0.111967	1.29798	0.0592124	0.0958176	0.744984	0.207448	0.186061	0.0680591	5.28846	56.9395	78.7684	10.6011	37.1681	21.8819	49.3658	1.60552	25.8953	5.63778	11.3285	3.97901	1.25697	2.40924	2.46823	0.838847	2.94535	0.554449	4.89696
21-04-20_69_n	COVID-19	0.697567	2.42294	0.703063	0.634439	0.144728	0.563074	1.63295	153.22	4.26818	2.00289	37.0381	33.0972	13.2265	2.72655	7.60798	0.465075	1.15517	3.2605	3.8315	3.37263	2.27952	0.327689	3.64647	0.125334	0.332755	1.67756	0.268951	0.248789	0.115321	7.17895	89.6253	102.916	14.686	39.2542	31.1108	46.0782	4.3521	17.2576	8.61146	13.607	3.293	0.570084	2.16275	2.45262	1.02699	3.90474	1.31996	3.77849
21-04-20_70_n	COVID-19	1.95796	2.64035	0.806777	0.766166	0.270448	1.29438	1.25309	207.666	4.45743	2.77994	66.9586	40.7052	13.2682	2.11848	12.9135	0.451074	2.36057	5.52473	7.14383	3.64686	1.62988	0.232739	4.38169	0.0923893	0.284315	3.12418	0.507689	0.608039	0.246548	6.61895	111.428	101.589	13.4856	47.6753	26.5918	70.3261	4.93724	36.7625	10.4682	28.0633	9.64657	1.08702	3.37635	2.66054	1.53735	4.02825	1.07188	6.8999
21-04-20_71_n	COVID-19	0.725564	2.58641	0.724966	0.188649	0.108163	7.36144	0.377876	52.7668	1.24595	0.556882	15.4291	12.4867	6.90382	1.51396	2.12208	0.0881443	0.469599	1.19365	1.40452	1.3751	1.22085	0.321565	1.32276	0.0136526	0.0598686	0.93055	0.151921	0.155157	0.0528999	4.83859	83.1661	96.4814	13.2594	43.1259	43.9289	35.7209	2.0011	17.6494	5.83138	17.0204	5.24569	0.760651	1.94101	2.01931	0.880065	2.74579	0.706941	2.48889
21-04-20_72_n	COVID-19	0.438693	2.49613	0.83809	0.138811	0.182748	1.17699	0.16988	48.1621	0.690835	0.566078	20.429	15.1942	5.76893	0.438448	1.06133	0.0418788	0.236246	0.744963	1.43745	0.842796	0.883543	0.0560433	0.553681	0.0187902	0.0118881	0.398863	0.29143	0.359353	0.159163	3.72185	84.639	125.666	23.1725	66.7346	22.5881	23.8479	0.969698	12.7268	4.63238	11.1485	3.79521	1.86603	0.755553	1.56123	0.814458	3.13514	0.820546	1.19181
21-04-20_74_n	COVID-19	1.92354	5.31237	2.07387	0.86255	0.547385	2.49122	1.35487	207.279	6.37521	2.90752	78.4746	58.4183	21.6853	2.29151	8.05927	0.685842	2.79329	7.06231	10.8987	10.0736	9.31661	0.733036	8.27066	0.33283	0.937342	7.87889	0.531213	0.616135	0.284938	8.04708	157.492	164.568	42.3819	89.708	33.8871	60.8744	9.14918	29.2751	13.4202	29.7948	10.3809	1.45325	4.17173	5.28175	3.40712	9.80761	3.24162	5.14927
21-04-20_78_n	COVID-19	4.06427	1.68982	0.492452	0.272362	0.097028	1.66925	0.594898	114.143	2.00193	1.40563	45.1326	30.6025	11.4668	1.15605	4.39378	0.172231	0.703938	2.64044	4.04583	2.1391	1.70177	0.148894	2.03062	0.0315268	0.0901005	0.892515	0.255667	0.307594	0.0877946	8.99334	171.104	203.574	44.3739	109.388	45.7497	74.8053	4.64181	43.4321	13.3028	26.7444	9.53879	2.32638	4.84475	7.28155	2.63072	13.1225	3.78876	9.09658
21-04-20_79_n	COVID-19	3.64004	4.4488	0.971858	0.540436	0.23194	1.14555	0.611111	101.727	1.49931	1.13065	29.6152	18.9749	4.85178	1.13911	3.7279	0.143856	0.847443	3.05418	3.74613	1.80998	0.547832	0.146152	1.18004	0.031374	0.0652514	0.935241	0.370579	0.31594	0.115147	3.30536	61.2051	70.4473	12.2479	36.2325	23.6114	43.466	2.72096	26.6539	6.50015	17.8132	6.56589	1.01416	2.74016	2.55068	1.37469	3.90037	1.03706	4.7131
21-04-20_83_n	COVID-19	1.72925	4.86896	0.952186	0.599725	0.306576	1.55667	0.644233	150.666	3.46428	2.08575	31.0083	26.4803	8.13359	1.7145	6.36664	0.403554	2.07011	3.71254	4.60143	3.51841	1.58218	0.354498	4.04484	0.135866	0.398306	4.97343	0.362001	0.41724	0.217635	18.7014	181.364	127.462	24.1773	43.8141	29.5576	68.3089	5.04782	27.6271	8.96342	31.1646	8.52506	0.7567	6.16452	3.28249	2.67567	4.45959	0.890983	6.84057
27-04-20_1_n	COVID-19	1.3873	1.87779	0.762499	0.241809	0.137599	1.80738	0.642768	93.2598	2.52083	1.44175	45.1904	24.9151	11.5598	1.64034	3.31815	0.287485	1.21341	3.67011	6.67122	4.46201	2.38654	0.415513	2.27238	0.0266899	0.281539	3.05274	0.633448	0.521982	0.248715	4.01031	66.7467	89.8885	18.6399	55.5759	26.3118	30.8685	12.2385	21.4545	8.39293	18.5312	8.6366	1.01888	3.51722	4.85036	2.64794	9.6919	3.91463	5.49067
27-04-20_18_n	COVID-19	1.93223	2.8371	0.90694	0.672295	0.336156	1.21583	0.452836	130.172	1.42798	1.78458	35.9953	19.7784	7.58659	1.30003	8.8825	0.232702	2.28908	3.28024	4.09237	1.7364	0.850371	0.126289	2.39213	0.0515168	0.13377	3.06834	0.435527	0.447843	0.166306	2.8777	84.771	89.1685	11.3835	36.258	21.3781	71.8612	2.84776	34.3544	8.18489	34.8275	10.5837	0.585215	2.47029	2.36723	0.986122	3.21385	0.553762	5.64542
27-04-20_45_n	COVID-19	2.22536	2.99114	1.06565	0.419469	0.410618	1.40033	0.722206	120.101	3.05153	1.20802	29.7017	27.0605	9.89972	1.13261	3.5611	0.290298	1.74956	3.50708	4.25681	2.33734	1.24763	0.13379	1.82777	0.0297807	0.163117	2.77407	0.488363	0.403634	0.248208	5.51877	60.8678	92.9335	10.3152	29.3588	19.8227	26.411	7.68209	10.8798	4.6736	29.0453	7.50068	0.470953	2.28393	3.59875	0.869987	4.58065	1.14239	5.34662
27-04-20_84_n	COVID-19	2.29868	1.58067	0.962838	0.699745	0.372431	1.29121	0.881252	202.314	2.79749	2.35285	74.0937	31.488	18.7311	2.21696	9.5016	0.373316	2.56388	3.07069	5.07818	1.96945	1.63875	0.161844	2.20162	0.0505308	0.13504	1.95617	0.753443	0.843129	0.314778	3.59991	99.6028	180.468	17.6563	87.5867	36.9419	76.0784	3.84421	44.5472	10.7464	41.7199	13.3958	1.58973	2.13496	3.32765	1.20244	5.48129	1.01634	3.75038
28-04-20_62_n	COVID-19	1.93907	1.30295	0.549365	0.852071	0.356698	1.85766	0.763117	147.402	2.49327	1.91306	45.3266	21.7858	14.7018	1.44417	12.5336	0.514438	2.85417	1.39918	2.64387	1.015	0.811017	0.0623003	2.1629	0.0761057	0.133902	2.30427	1.0067	1.18855	0.488954	2.5954	56.5908	81.1289	6.23276	35.3576	18.9459	65.9092	3.29937	35.3161	8.09895	31.1352	9.16073	1.1117	0.331661	0.361872	0.299349	0.751795	0.132003	1.01481
28-04-20_80_n	COVID-19	1.48264	3.96267	1.76087	0.99822	0.206939	3.01288	1.09602	302.362	4.12568	3.79796	90.8836	46.106	22.0615	2.85751	12.9216	0.58382	1.73199	4.27716	7.16509	3.24912	3.01283	0.333529	5.77577	0.204737	0.430579	2.76419	0.654958	0.851539	0.277814	4.13529	102.868	164.131	15.6892	63.0342	34.8186	76.8437	2.05357	34.7905	10.2046	20.3108	5.52724	1.87356	1.77273	2.74835	0.710419	3.58204	0.855784	4.16351
28-04-20_82_n	COVID-19	1.36864	2.86857	1.02053	0.732063	0.419738	1.25374	1.49802	272.406	5.03188	3.93995	65.9678	44.3721	15.0353	2.85022	11.3353	0.424541	3.04557	5.73896	7.60051	3.77973	1.80231	0.255873	3.60631	0.0676058	0.199887	3.46586	0.636038	0.578354	0.282718	3.78095	96.8997	98.9584	13.2478	35.7147	28.3835	55.9321	3.74256	21.1139	7.80972	29.5034	7.41262	1.48091	2.24323	2.48715	1.05321	3.51316	0.882782	4.28227
28-04-20_89_n	COVID-19	0.809507	5.03944	2.1698	0.849252	0.576784	1.17888	0.613161	161.901	1.36273	1.64134	51.7476	17.0257	11.9732	1.99908	9.04186	0.255255	2.49038	2.78017	4.9452	1.8126	1.61037	0.227025	3.18104	0.0614299	0.139199	4.03283	0.464664	0.45833	0.141091	2.49719	49.4017	103.937	10.0716	42.6411	24.8207	63.9369	2.47492	33.9999	5.12492	28.1385	9.9627	0.825356	1.18874	1.58761	0.947763	2.44782	0.264426	2.57618
28-04-20_94_n	COVID-19	1.64108	3.18671	1.33944	0.887066	0.364654	1.00837	0.876816	206.193	1.9761	2.72707	75.3513	31.9972	19.8913	1.86114	14.1243	0.365815	3.14678	4.14003	7.94847	2.91629	2.20894	0.210918	4.70287	0.0945323	0.203946	4.35437	0.618148	0.791583	0.243787	2.79878	87.0121	138.573	13.6543	55.5291	21.876	84.2326	3.03931	45.0414	8.09992	33.6277	11.1695	1.04574	2.09865	2.84432	1.41052	4.36505	0.645389	4.98382
28-04-20_95_n	COVID-19	1.10709	3.26654	0.709834	0.715705	0.249876	0.959343	0.431917	105.99	1.88714	1.65305	31.0928	19.4033	3.96252	0.7692	7.44801	0.218937	1.53707	2.65969	4.48564	1.82827	0.455002	0.0817161	1.7467	0.0271452	0.105132	2.05513	0.571362	0.64533	0.342463	7.42931	106.575	96.9055	15.5251	34.9882	23.413	106.345	5.66842	51.6134	12.0805	40.5182	11.5352	0.770244	3.03051	2.00991	1.667	2.94787	0.671659	6.33624
28-04-20_97_n	COVID-19	1.12366	2.99652	1.19749	0.766734	0.466632	1.06618	0.91466	216.736	2.16152	2.71137	82.4998	28.2281	14.5679	3.01933	13.4134	0.684362	4.46516	4.95261	7.56302	2.20163	1.13982	0.172977	2.32694	0.0389269	0.177661	3.71091	0.733746	0.795572	0.291454	2.26401	66.2636	92.6429	12.3802	44.2614	28.3909	67.8379	5.50442	43.9981	9.41343	41.81	16.4317	0.949756	1.77407	1.86172	1.27085	2.89781	0.42735	3.58996
28-04-20_99_n	COVID-19	0.839247	2.12701	1.03574	0.716322	0.332595	1.72282	0.615723	146.17	2.08644	1.99547	49.2358	18.3749	8.71211	1.52565	8.01633	0.207439	2.25961	3.03346	5.29232	1.41943	0.771999	0.13406	1.75145	0.0201453	0.0678137	1.886	0.582777	0.585758	0.264548	2.84801	53.661	88.6222	8.45773	40.2875	20.5297	55.2124	2.76397	31.9727	5.10416	28.011	10.7154	0.914537	1.30008	1.8968	0.769999	2.81362	0.421054	3.15437
28-04-20_101_n	COVID-19	2.1556	4.88117	1.07955	0.505493	0.410637	0.527583	0.684051	195.45	2.555	1.86934	46.1373	29.8783	8.31813	0.951552	4.28866	0.116262	1.53497	10.0982	12.0589	6.88623	2.64523	0.259026	4.1881	0.0631196	0.161565	4.97332	0.266463	0.292615	0.122678	10.8699	201.415	192.375	33.2866	70.0331	26.9203	70.4831	3.26327	26.6363	6.03848	32.6744	9.77162	0.922784	15.3284	15.1003	8.7976	19.0779	4.32013	20.9201
28-04-20_CE_n	COVID-19	1.5849	1.49905	0.550681	0.378277	0.318242	0.820366	0.404221	139.932	1.13537	1.74571	44.3819	19.8962	6.60676	0.674588	3.89443	0.209817	1.93791	3.31497	5.83942	3.13914	0.88416	0.0532942	1.20866	0.0185553	0.0720183	1.55543	1.12629	1.33067	0.497014	4.58481	148.801	178.614	15.6759	80.572	25.0357	75.0489	6.08895	37.8819	10.095	59.7521	20.5994	1.62361	4.71231	4.51532	4.17195	7.70283	2.02457	6.18305
28-04-20_CM_n	COVID-19	1.81944	2.105	0.81374	0.702001	0.234496	1.51817	2.06597	259.761	5.09753	3.82205	73.979	51.8755	31.5933	3.05979	16.2239	0.640002	2.69829	6.47814	10.4956	3.94919	2.95059	0.232228	5.16223	0.145869	0.297155	3.40647	1.01006	1.42837	0.529973	5.97451	110.096	146.77	17.0187	52.4448	28.7766	73.8114	3.07711	29.3066	9.56329	25.1942	5.24328	2.19531	2.5348	4.2245	1.48136	5.93149	1.15864	7.60489
28-04-20_IRA_n	COVID-19	1.56488	4.43962	2.87344	0.801756	0.355515	0.945956	0.668637	157.63	1.59743	1.8593	38.4556	28.6015	16.4648	1.13143	6.59635	0.321509	1.63528	5.04256	7.93871	5.85448	7.5979	0.563673	11.1044	0.47967	0.93192	9.36172	0.506669	0.620614	0.164891	2.87078	70.367	158.306	7.72744	33.5131	20.5428	64.4047	2.43379	24.9597	8.27154	21.5047	4.63987	2.63424	3.09068	6.13205	1.13668	7.47967	1.86611	7.43195
28-04-20_SG_n	COVID-19	1.17061	1.72997	0.862833	0.519411	0.132668	1.16446	1.04254	219.598	3.51569	2.66877	66.7815	32.783	17.4003	2.11654	10.0767	0.388831	1.27285	3.27586	5.04757	1.67892	1.96606	0.185617	3.59278	0.100473	0.249486	2.02035	0.380429	0.496233	0.168966	5.37194	128.55	196.247	18.7674	74.5987	39.8602	90.2745	3.66216	42.7519	12.0004	24.7915	6.45023	2.43289	1.98628	3.13878	0.851957	4.42947	0.811909	5.168
12-05-20_14POS_n	COVID-19	3.97665	5.08747	1.68065	0.997682	0.549045	0.95338	0.859089	202.514	3.0772	2.02737	47.3186	41.0519	18.9405	2.17946	14.6768	0.452858	3.61493	5.9037	7.43507	5.7553	2.91907	0.350778	7.90488	0.0958823	0.444469	7.46984	0.393662	0.461481	0.173422	7.00984	149.953	170.903	16.6407	54.5543	25.65	99.4297	6.06412	40.5287	9.59457	31.2706	8.60866	1.89786	6.03214	5.37673	2.62228	6.41041	1.81161	11.1921
12-05-20_15POS_n	COVID-19	3.68019	3.51243	1.33779	0.528516	0.35185	0.838378	0.72226	213.553	2.6308	2.52587	65.8681	27.8583	16.0989	1.98796	8.64798	0.376798	2.85512	3.16258	5.31588	1.63145	1.17395	0.129473	1.9079	0.0211876	0.105603	2.54284	0.580709	0.653362	0.265513	2.59219	63.875	146.048	7.21929	53.8183	31.0843	80.7165	5.11843	38.5029	10.6476	43.7625	12.1961	1.20937	1.04025	2.27257	0.619128	4.01785	0.717995	3.85719
12-05-20_16POS_n	COVID-19	4.22658	5.40609	4.02504	1.25217	1.03151	4.24604	0.549582	146.212	2.81312	1.75617	51.9522	16.8567	11.2396	0.905541	6.77357	0.245637	2.45599	2.61163	5.58506	1.06586	0.953649	0.079931	1.4233	0.0051556	0.109327	2.72164	0.365589	0.355865	0.173341	4.82191	70.2988	153.483	7.95851	61.5847	28.7363	73.6095	3.90232	35.9024	7.81848	41.3791	14.3229	1.22065	1.32276	2.74137	0.706312	4.01301	0.714155	3.98834
12-05-20_125_n	COVID-19	3.4683	3.55114	1.12019	0.427887	0.141162	1.04362	0.363107	120.322	0.992618	1.18898	34.4416	17.5353	5.54268	0.807305	3.29047	0.167768	0.653723	2.83348	4.67831	2.16513	0.843316	0.0819671	1.34502	0.0421269	0.113697	0.995156	0.403743	0.423353	0.125669	5.93899	145.152	208.685	10.9988	79.298	32.5052	81.4317	2.66728	40.4905	10.4158	23.6308	7.11185	2.09416	4.57401	6.1497	2.95022	8.84796	2.22356	7.20335
12-05-20_126_n	COVID-19	4.3576	2.15387	0.576668	0.39059	0.172004	1.06633	0.555868	140.973	2.03491	1.87417	37.6171	23.815	10.2592	1.36575	6.20353	0.204306	1.36026	2.08658	3.2695	1.61462	1.08862	0.12031	2.29126	0.0142499	0.106994	2.2658	0.536209	0.675127	0.232881	7.62387	160.883	190.06	15.1087	65.0556	34.9661	93.2225	5.51044	37.3811	10.794	34.9545	8.94152	2.10858	2.05467	2.81888	0.856956	3.70975	0.864788	5.29747
12-05-20_127_n	COVID-19	4.1991	4.33794	1.64819	0.489666	0.136916	1.07924	0.082808	52.5268	0.701296	0.636878	14.0997	15.3841	7.0643	0.397688	3.70551	0.109137	0.787851	1.94308	4.15826	3.60967	2.19558	0.146383	4.2158	0.0857382	0.253101	3.28555	0.200989	0.202941	0.0712596	7.62449	194.631	266.736	27.8013	77.6452	24.4085	130.472	2.99095	58.4938	13.1484	25.9556	7.21472	1.35259	8.56226	8.18527	7.79104	12.4916	3.59655	12.3338
12-05-20_129_n	COVID-19	3.88912	3.27258	0.808347	0.66397	0.194162	1.05668	0.718281	204.275	3.05536	1.91284	41.8282	29.5518	9.14625	1.60857	7.93072	0.35487	1.44563	4.78045	5.94968	2.61382	1.05938	0.157839	2.48935	0.0952225	0.166113	1.95334	0.682828	0.525543	0.247509	9.17124	152.801	174.071	16.659	43.9343	36.4115	103.421	6.14978	39.3645	13.2834	29.6426	8.64682	1.21982	4.65271	4.12774	1.5609	4.70041	1.21925	9.83353
12-05-20_130_n	COVID-19	3.60831	7.43772	1.69954	0.801146	0.455221	0.958271	0.75617	189.093	2.68131	1.76726	44.3955	37.0957	17.1139	1.91099	13.3334	0.409576	3.2648	5.36706	6.98813	5.28757	2.6262	0.306504	7.22022	0.0799297	0.398199	6.91286	0.46128	0.483337	0.21287	4.46262	104.847	126.359	11.7662	36.4734	19.5156	64.6957	3.85058	27.0835	5.81012	20.4492	5.41017	1.44529	4.28882	3.90748	2.43577	4.70616	1.23464	7.52104
12-05-20_132_n	COVID-19	3.28438	2.69442	0.931117	0.279124	0.132313	0.701076	0.148405	64.4293	0.671851	0.653405	16.1245	13.3901	6.77397	0.679093	3.69	0.0785864	0.727452	1.10716	1.50371	0.969611	0.697715	0.0489839	1.30712	0.00341501	0.0534427	1.02031	0.196975	0.164805	0.0842554	3.60857	82.9861	141.338	8.29621	48.2879	25.8318	64.1248	3.00573	29.083	7.07381	21.5497	6.51881	0.907164	1.57563	2.33965	0.688149	2.8468	0.744666	4.26352
12-05-20_134_n	COVID-19	3.07978	2.60691	0.679938	0.365369	0.107843	1.47042	1.03081	141.121	3.21537	1.68576	40.1309	25.7097	10.5839	1.24279	5.52334	0.209044	0.897463	1.33256	1.83414	0.909056	0.848722	0.0854262	1.40621	0.026113	0.0733063	0.756941	0.308152	0.339005	0.145157	7.03824	98.8015	128.443	10.7494	40.4332	24.224	57.0861	3.77667	25.6192	8.47391	16.1719	4.75781	1.95581	0.658341	0.867421	0.29849	1.28572	0.261037	2.00096
12-05-20_136_n	COVID-19	3.22468	5.42015	2.91974	1.18245	0.437742	3.97292	2.01888	268.754	5.78489	2.82908	61.1604	46.0937	23.1759	3.30165	11.5809	0.676978	3.01948	5.29541	7.23591	8.06421	7.20695	0.913887	9.87111	0.385541	1.06115	8.70227	0.638374	0.711245	0.271762	7.2346	141.996	165.664	17.9269	49.464	44.2136	77.5429	11.7712	30.0766	12.9776	28.5565	6.80957	1.22371	3.58947	4.40141	1.72595	5.32293	1.85557	5.00351
12-05-20_138_n	COVID-19	3.83833	3.53752	1.3754	0.481874	0.295665	1.07586	0.186898	93.0883	0.684879	0.873418	21.9008	9.65378	4.97276	0.412209	3.67231	0.105891	1.05364	1.85827	2.60122	0.962207	0.623728	0.0197262	1.16801	0.00520702	0.063284	1.18774	0.180826	0.227656	0.0744736	5.97884	142.102	236.584	14.0408	70.7724	26.1431	125.781	3.60001	54.2792	10.6111	59.2823	18.8682	1.27597	3.69446	5.2916	1.77655	6.68018	1.02204	9.77041
12-05-20_139_n	COVID-19	3.82592	2.54073	0.752553	0.20074	0.106331	0.7684	0.81983	121.769	3.59769	1.07965	40.2116	35.2116	17.5925	1.6769	4.64973	0.0886036	0.642183	2.85106	3.54589	3.29961	3.31187	0.376233	2.58598	0.0540946	0.100403	1.16974	0.514226	0.495785	0.250318	11.0856	122.535	172.465	21.144	79.196	46.0459	65.4031	1.63167	35.6611	12.0604	20.672	7.65905	2.56334	2.23358	3.26245	1.24018	4.7655	1.98148	4.56679
4-05-20_AI_sano_n	HEALTHY	0.734183	1.65551	0.788641	0.181285	0.142343	0.479637	0.479963	79.1202	1.33698	1.53273	38.9031	26.4478	44.2438	2.50302	6.61415	0.228193	1.32378	1.12543	2.28169	3.18641	4.4969	0.25936	2.36656	0.0324378	0.0844818	1.16102	0.217163	0.372381	0.0689017	2.18656	68.6885	185.915	17.4209	104.741	39.0169	67.8698	2.90984	41.0904	11.2063	24.4843	7.10961	4.00567	0.497435	1.07684	0.919863	3.36518	1.07792	1.09314
4-05-20_EA_sano_n	HEALTHY	0.693292	1.2118	0.27995	0.0687273	0.0987134	0.451636	0.787413	74.3411	1.78611	1.27795	28.8712	31.1538	30.6148	1.7425	5.20789	0.207128	1.176	1.5291	2.05079	2.67215	3.0247	0.196242	2.16383	0.0163879	0.0701091	1.20314	0.195759	0.306914	0.058758	5.24937	99.3804	146.592	23.8201	77.3377	33.962	70.0592	4.77867	28.8374	10.6304	30.9909	7.05456	3.10525	0.81471	1.45038	1.21419	3.03602	0.932809	2.1506
4-05-20_EB_sano_n	HEALTHY	0.699096	1.03939	0.313021	0.0856839	0.189896	0.418189	1.24039	92.6188	1.75067	1.45491	33.0997	28.7382	34.3476	1.39896	6.15533	0.177135	1.91927	2.24424	2.57219	2.93671	3.18247	0.1615	2.22569	0.0164534	0.0571158	1.74029	0.265797	0.339082	0.0807033	5.71718	101.165	189.026	22.3416	95.8216	32.3468	84.9828	9.46016	48.8475	12.3264	51.9992	14.6909	3.49708	0.959849	1.41616	1.14239	3.32142	0.939817	2.29911
4-05-20_EM_sano_n	HEALTHY	0.76846	1.25331	0.484113	0.11376	0.107893	0.472546	1.38766	99.3827	2.61142	1.55675	36.3951	26.3073	36.8179	2.30616	7.28652	0.237989	1.66951	2.16576	2.73954	2.63081	4.39134	0.330522	3.23484	0.0564225	0.125105	1.94603	0.226211	0.289626	0.0659724	5.47354	89.3988	192.526	19.9055	94.7566	45.3419	88.1288	7.41532	48.2381	14.0686	42.2683	11.4459	3.29497	0.659955	1.55007	1.01311	3.9565	1.02717	1.94954
4-05-20_MC_sano_n	HEALTHY	1.32185	1.51284	0.467672	0.139603	0.153787	0.394085	1.50165	111.102	2.57508	1.09502	45.3374	26.8952	23.7319	2.57693	5.33605	0.204933	0.986765	2.47104	3.63481	3.31351	5.18004	0.570254	3.66871	0.13963	0.198354	2.27498	0.252418	0.328231	0.0711242	12.4516	133.142	201.898	41.1541	123.108	67.8112	93.0383	9.11165	55.3404	14.1858	37.0735	13.089	1.82549	2.45092	3.54089	2.75894	10.108	1.2805	4.9986
4-05-20_MM_sano_n	HEALTHY	0.596438	0.724591	0.178029	0.0794532	0.0863683	0.478045	1.45094	112.966	2.65063	1.76949	41.6354	43.9861	55.4322	3.31352	12.1761	0.374047	2.06313	1.83792	2.44081	5.13568	4.71519	0.298909	3.48648	0.0546585	0.131023	1.52092	0.369253	0.450373	0.0972522	4.85074	57.4715	145.823	18.1225	53.8956	36.2369	79.8278	5.03084	29.0184	12.9093	28.7785	7.67999	2.2768	0.754622	0.887395	0.706503	1.73241	0.751323	1.78271
4-05-20_NC_sano_n	HEALTHY	0.622379	1.89628	0.857232	0.17816	0.179128	0.455287	1.23109	93.9989	1.9649	1.2814	34.8894	29.123	50.3612	1.66288	6.32105	0.252756	1.46762	1.97013	2.6187	3.12647	5.45172	0.212118	2.8332	0.0556182	0.113248	1.54486	0.206848	0.30722	0.0660585	4.05901	79.5618	216.581	15.7243	67.3868	34.6318	76.8825	6.2989	37.1208	11.8094	34.8058	9.33145	4.37449	0.691784	2.04831	0.59341	3.5051	1.44191	2.46683
4-05-20_ST_sano_n	HEALTHY	0.481371	1.33748	0.329566	0.1076	0.110806	0.424931	0.804775	86.0784	2.12756	1.2759	27.92	29.2722	27.7109	1.79972	6.27692	0.232678	1.29384	1.71156	1.90101	2.58247	2.25771	0.254218	2.33601	0.0360475	0.0974167	1.80659	0.195733	0.32127	0.0552778	3.94146	72.5588	119.04	16.3734	60.7358	29.9621	60.0933	4.36801	34.2075	11.2184	28.3473	7.90442	3.10166	0.656019	0.832675	0.63747	1.96188	0.652603	1.74252
11-05-20_1SA_n	HEALTHY	4.95557	0.593832	0.203737	0.0599018	0.058979	0.694182	0.790526	159.648	2.35047	1.80396	64.6819	37.3593	59.8075	3.16033	7.30686	0.394834	2.06386	2.84577	4.06878	6.32653	7.55616	0.38224	3.50553	0.0697886	0.189696	1.99886	0.399454	0.634275	0.122285	4.86475	117.765	280.322	27.7181	143.684	52.608	84.0953	8.60496	42.7588	14.343	41.9749	14.1797	2.11935	2.3135	5.39321	3.98475	13.6066	4.01186	4.52665
11-05-20_2SA_n	HEALTHY	3.79848	0.972797	0.312942	0.107527	0.0744163	0.61029	1.3351	117.115	2.56318	1.41221	43.266	24.8137	28.5261	1.91968	7.04466	0.236738	1.32836	2.41379	3.34512	3.49578	3.97869	0.287693	3.03216	0.0492342	0.14413	2.02805	0.28151	0.300573	0.0917266	3.92191	60.6407	106.322	14.2629	59.2745	25.1317	56.0632	8.56286	36.7382	8.49074	29.5796	7.21188	1.67615	0.968567	1.48775	1.08255	3.96644	1.00017	2.94255
11-05-20_3SA_n	HEALTHY	3.78035	0.308042	0.1017	0.0255519	0.0316312	0.552111	1.18955	94.4263	1.74931	1.16116	32.2315	27.2518	47.7352	1.87123	5.37814	0.175859	1.27769	1.67681	2.39595	5.44863	5.70797	0.238149	2.26844	0.0176146	0.0815318	1.38547	0.326783	0.165945	0.124719	3.56579	64.1975	149.407	14.8715	75.577	27.2721	52.0473	5.97455	27.1211	7.15528	20.7637	6.86392	2.4867	1.17624	2.26287	1.80141	5.26648	2.3381	2.0507
11-05-20_4SA_n	HEALTHY	3.73262	1.87834	0.751839	0.147046	0.288087	0.680606	1.13202	111.09	2.15859	1.62583	43.3001	28.3261	36.6145	1.24935	4.91497	0.285794	1.84282	2.16241	2.91066	2.47898	3.46677	0.151475	2.05112	0.00664783	0.128864	2.05084	0.345527	0.467556	0.140251	5.55259	90.5474	207.071	18.4894	103.165	29.0291	65.6169	21.0957	34.255	12.6124	45.4365	13.2709	3.86772	0.690891	1.63356	0.771471	3.24443	0.975133	1.95037
11-05-20_5SA_n	HEALTHY	4.15342	0.608945	0.170357	0.0497383	0.0436696	0.900667	0.826473	110.077	2.41154	1.45698	41.425	38.6148	44.2267	2.00845	7.38563	0.217918	1.11674	1.83508	2.59623	4.1474	3.60764	0.195875	2.61217	0.0251722	0.072565	1.29574	0.300712	0.400259	0.115056	5.2429	101.473	194.749	20.3161	98.6266	39.4395	80.203	5.43197	44.4731	15.3191	27.0919	7.90786	4.22563	0.922004	1.40071	0.963394	3.17775	1.34943	2.0059
11-05-20_6SA_n	HEALTHY	5.26929	0.713095	0.223251	0.0752369	0.0562403	0.884778	1.37287	153.785	4.78797	1.81235	37.8202	42.2685	46.3463	2.76973	9.65463	0.298152	2.04878	3.10039	3.98026	4.28273	4.68198	0.303939	3.59805	0.0425314	0.102175	1.93657	0.376886	0.401073	0.133896	8.81804	113.482	204.949	14.5616	79.2565	40.7437	100.323	7.39387	37.9375	13.8223	39.5264	7.52708	3.60639	1.32108	3.03718	1.43644	6.26211	2.14532	4.44082
11-05-20_7SA_n	HEALTHY	3.75398	0.990881	0.628574	0.0628433	0.0730006	0.696269	1.31917	153.059	3.16177	1.44234	49.8059	40.0018	62.9276	3.0437	6.75172	0.22443	1.18774	2.15124	3.43068	5.99549	7.23273	0.372799	2.77027	0.0336619	0.0818307	1.21473	0.375983	0.496865	0.138286	6.04839	115.311	265.06	19.9437	110.48	57.5149	84.3398	5.89934	37.8284	13.3374	28.2445	7.28556	4.39033	0.860665	2.47084	1.19203	5.17193	2.47009	2.26655
11-05-20_8SA_n	HEALTHY	3.52031	1.0669	0.463783	0.0850686	0.0601236	0.588366	1.2612	130.821	3.14662	1.33392	45.1624	32.8858	42.2357	1.90023	5.42272	0.154097	0.639464	2.70343	3.6791	3.83289	4.86955	0.281266	2.51665	0.0680163	0.0987687	0.999221	0.319778	0.394294	0.095866	10.6216	115.359	274.683	19.3458	121.954	48.5499	90.6697	4.44846	41.6434	12.8284	21.573	5.82553	3.88301	2.10071	4.82645	1.21658	7.31717	2.40348	5.46427
11-05-20_9SA_n	HEALTHY	4.22009	1.38847	0.623906	0.0920552	0.139255	0.969436	0.900168	138.563	3.33826	1.22374	48.5224	42.5455	56.9924	2.46595	8.37398	0.287574	2.32336	3.72155	4.37296	4.19118	6.40519	0.314004	3.47084	0.060999	0.136647	2.73001	0.369057	0.399694	0.147104	8.88119	109.536	214.012	20.3045	106.843	34.3717	86.0829	8.76545	41.6133	12.6047	43.2141	12.6179	4.34496	1.75801	4.42322	1.45458	7.55874	2.47225	5.70757
11-05-20_10SA_n	HEALTHY	4.2732	2.43247	0.641813	0.185286	0.212493	0.895113	0.924135	125.479	2.68839	1.67192	37.902	28.7944	30.6114	2.56344	6.39613	0.318689	1.37912	1.78203	2.48309	2.42157	2.73261	0.279511	2.34327	0.0382335	0.132929	1.37818	0.290546	0.358881	0.103429	5.95747	109.797	190.291	16.2295	82.3024	49.1213	83.195	6.73916	39.1143	14.3016	35.1827	9.28318	3.2796	0.882943	1.44405	0.696454	3.0586	0.733806	2.35019
11-05-20_11SA_n	HEALTHY	5.01989	0.566665	0.175018	0.0542891	0.0244786	0.58079	1.20309	71.7108	2.25229	0.985928	27.7688	21.5291	37.7743	2.19559	4.78849	0.116752	0.551689	1.625	2.55625	4.4633	5.94768	0.409285	2.77323	0.0670348	0.129846	1.09665	0.227259	0.249034	0.0987906	8.50437	94.8616	214.026	20.6635	111.545	49.1478	81.6231	6.53834	40.1161	11.2785	16.4767	5.05442	4.09185	2.6418	5.88087	2.56163	11.6842	4.5348	6.84525
11-05-20_12SA_n	HEALTHY	4.23417	0.767114	0.261118	0.0593571	0.0486235	0.736573	1.41099	188.707	3.37918	1.74417	64.2777	49.9872	63.8472	2.19349	7.10286	0.299337	1.6766	3.43747	4.53722	5.87706	6.64358	0.223278	2.61823	0.0612509	0.104871	1.52597	0.506433	0.632154	0.169138	6.76413	117.9	254.34	22.8072	120.965	36.2433	74.6215	4.42439	34.489	12.2979	33.744	8.56586	3.90753	1.56449	3.68828	1.59587	6.4984	2.29883	3.68011
11-05-20_13SA_n	HEALTHY	4.64831	0.24848	0.0837799	0.0414931	0.00439727	0.635128	1.56331	148.371	3.08498	1.6753	54.0535	44.4648	52.2883	5.73094	10.0486	0.479338	1.00349	3.10011	4.20989	4.98078	7.33246	0.730775	3.90097	0.157512	0.246989	1.10098	0.394599	0.486704	0.0920604	7.75965	110.457	185.628	21.0876	86.5161	57.4843	77.944	4.85364	37.5814	11.6622	15.8651	5.02924	2.75335	1.88992	3.74378	1.52012	7.22026	1.71347	4.65502
12-05-20_SC_sani_n	HEALTHY	0.889679	0.682659	0.278899	0.0648405	0.0322512	0.615755	1.4275	88.2707	3.31141	0.535173	21.6289	20.3814	30.3109	1.55755	3.84495	0.11476	0.341059	1.91881	2.19406	2.64277	5.52677	0.340227	2.93619	0.12386	0.150769	0.860755	0.203522	0.185689	0.0470914	17.9316	79.1651	214.143	13.3593	64.6135	28.8914	82.3001	6.71909	21.237	10.342	12.8708	2.04756	3.12994	1.15092	3.92767	0.789271	4.65612	1.56727	4.63541
21-04-20_A_n	HEALTHY	3.87632	0.672186	0.478917	0.152282	0.14036	7.00899	0.918815	128.567	3.06775	2.04808	52.7273	35.7651	36.6185	2.3951	7.55585	0.241443	1.21408	2.3996	3.60121	2.86597	3.29567	0.216137	2.3332	0.0444428	0.0711564	1.05481	0.563143	0.676419	0.213348	4.30771	80.4351	154.425	18.4641	87.0084	38.4966	75.285	3.38133	44.371	13.8003	27.3646	7.92691	5.15344	0.78348	1.40009	0.924104	3.32317	1.22296	2.19623
21-04-20_B_n	HEALTHY	2.57603	0.448532	0.164632	0.048634	0.0360279	2.35399	1.03759	71.6258	1.9326	0.870099	21.7598	14.0483	16.1804	1.81896	3.35682	0.122545	0.593106	2.84465	3.21141	4.14397	3.27086	0.354579	1.86617	0.0827678	0.052867	1.10369	0.184211	0.198153	0.0905704	14.8165	113.762	221.818	27.0391	105.147	73.3305	106.399	6.14634	44.4928	11.261	28.9782	8.49888	4.06646	7.46787	11.3801	5.82482	19.6911	7.67826	15.9247
21-04-20_C_n	HEALTHY	2.4392	0.420762	0.150503	0.0462719	0.0606043	1.9492	1.5278	123.811	2.90804	2.06295	46.8254	35.3184	39.8746	2.32192	6.23021	0.221008	1.41909	2.25112	3.37057	4.68049	5.23323	0.259783	2.24671	0.0248051	0.0789713	1.34328	0.338426	0.474783	0.151386	5.22082	89.0481	157.299	23.6435	85.7859	39.0375	63.4913	8.48354	30.8218	10.8012	29.0864	7.28044	2.78003	1.01595	1.91993	1.88398	5.77036	2.41934	1.89872
21-04-20_D_n	HEALTHY	2.2795	0.529818	0.165084	0.0555234	0.113473	3.07007	0.692284	87.2443	1.60009	1.49963	31.9067	26.9251	28.1441	1.20265	4.64629	0.133584	1.28736	1.60333	2.09174	3.07813	2.16748	0.114224	1.47673	0.00740272	0.0412873	1.08913	0.322659	0.365574	0.122299	2.92741	85.0561	136.837	20.9344	76.8048	28.7214	63.5359	9.97737	35.7383	10.7913	35.1906	11.3304	3.74356	0.805994	1.15855	1.22562	3.47318	1.18638	2.18653
12-05-20_DA20_n	ICU	2.49725	4.2735	1.5539	0.385393	0.27739	1.07972	1.23381	208.462	3.75572	1.70828	46.4404	47.6434	17.8938	1.58393	3.97172	0.305336	1.16756	7.738	8.58738	9.00163	5.6376	0.492513	2.84211	0.158114	0.392765	2.79241	0.423785	0.385169	0.294122	11.2099	162.85	213.579	22.7621	77.2911	42.0355	52.6565	6.49727	18.5447	9.36017	20.221	5.54464	1.33106	7.36025	14.9172	3.97573	16.9197	7.79202	10.5219
12-05-20_DA23_n	ICU	4.48251	21.3473	12.6802	3.54859	1.7833	2.80868	0.306784	193.791	2.84112	2.22972	65.0624	101.733	85.563	9.44828	34.7475	1.61957	11.3077	10.3763	28.1638	46.8182	36.3102	4.4554	67.0774	1.70522	3.2064	36.659	1.95497	2.48168	1.49432	5.1127	235.22	307.997	61.3357	115.691	42.0144	143.917	4.53499	72.4992	17.3595	35.4579	11.3262	1.25031	8.11222	5.25432	7.919	9.57277	2.34878	6.14153
12-05-20_DA24_n	ICU	1.45437	3.50402	1.29836	0.455372	0.249992	2.42429	1.10501	189.653	4.65889	2.32009	60.9759	39.9222	14.9315	2.18808	5.7116	0.354669	1.91408	3.72074	6.75942	3.39432	1.72609	0.291278	2.45387	0.0239818	0.261603	3.2666	0.241655	0.236715	0.157283	5.39227	104.708	153.875	17.2263	65.6593	36.9319	55.719	18.6553	26.5165	9.64311	26.4289	8.51052	0.966548	2.81717	5.00876	1.7908	8.3991	2.53393	6.57673
12-05-20_DA25_n	ICU	1.11872	4.66039	1.92768	0.411947	0.339156	0.857923	0.481536	104.305	2.04895	0.994782	38.6604	25.9711	10.5997	1.81056	3.73968	0.142811	1.5403	2.84821	5.71502	3.86658	3.7122	0.746249	5.21691	0.095936	0.201835	4.81685	0.257537	0.358282	0.125539	5.67044	107.402	125.865	20.4391	71.0334	26.188	41.3139	2.33061	27.5144	5.28414	15.3001	6.8271	0.737783	4.26989	5.25748	2.93775	9.66114	1.99594	6.12462
12-05-20_DA26_n	ICU	3.47158	13.0932	10.5537	1.60244	0.771283	0.999482	1.22679	417.497	6.85943	3.52512	147.785	84.8753	56.1957	5.42307	14.9305	0.819348	5.1146	8.80265	24.1772	13.3442	15.5475	1.59699	17.0312	0.375733	1.10137	13.3912	0.731701	0.860226	0.184643	5.90093	225.166	286.238	67.1682	128.853	57.6541	95.2478	5.22926	59.4978	13.3903	44.3058	15.2099	1.09861	9.64808	9.34808	8.82305	15.5536	2.95357	8.48522
12-05-20_DA28_n	ICU	1.86958	3.12371	1.05898	0.330194	0.186212	0.718286	1.63235	271.575	5.97231	2.42727	50.394	45.0084	19.0697	2.75709	7.71966	0.587695	1.86033	6.64273	6.18187	4.76706	3.03939	0.437863	3.401	0.0796593	0.439203	3.14023	0.402887	0.313288	0.161466	7.99885	136.25	172.963	14.3262	50.6182	47.7161	68.3099	12.9152	22.3413	15.1095	34.2348	7.84534	0.95172	4.44733	6.61837	1.63611	7.45989	2.67133	8.21555
27-04-20_DA7_n	ICU	2.11215	6.59006	1.76583	0.688523	0.543293	0.943977	0.54462	107.241	2.59777	0.688821	24.2792	29.3574	21.006	2.43981	7.40624	0.463261	2.88574	3.42064	4.46201	5.62009	7.28157	0.789229	12.9474	0.358688	0.607155	8.93452	0.283485	0.238982	0.125229	9.88261	136.511	136.112	27.5102	47.1724	21.6772	55.7423	3.36158	22.9714	5.63471	20.2611	5.80683	1.24695	5.61058	6.07051	3.17056	7.34847	1.23112	8.61551
28-04-20_DA39_n	ICU	1.48063	8.04594	3.23063	1.42031	1.09771	1.17342	0.28273	103.229	1.51668	1.12198	31.7236	27.7005	20.456	3.51239	8.93793	0.402415	2.94316	2.58774	5.00777	7.52374	10.7	1.65447	20.4514	0.463891	0.980857	15.0254	0.439618	0.653031	0.209357	3.88793	96.0022	134.923	15.1873	51.1088	28.4381	63.7399	3.08154	27.3496	7.13574	19.1106	5.03036	1.60479	1.70575	2.00103	0.981164	3.12734	0.583541	2.67611
28-04-20_DA40_n	ICU	1.40482	10.6998	4.13928	1.68529	0.68008	0.571302	0.354082	139.61	1.97965	1.91216	50.7944	57.4406	45.0236	4.55005	19.9177	0.75093	5.29043	4.32213	10.3143	18.224	14.2933	1.76888	31.1511	0.871597	1.46959	18.0665	0.55158	0.77835	0.367093	3.32675	145.424	177.713	43.5831	83.2563	32.3949	104.206	3.70101	51.5383	11.9781	29.0756	8.80732	1.10389	8.24382	6.3579	8.0373	11.7227	3.29744	10.0964
28-04-20_DA41_n	ICU	0.961407	3.47633	1.09399	0.289241	0.183109	0.453893	0.565013	102.336	2.67652	1.7579	43.676	31.9734	14.187	1.76508	4.4504	0.252969	1.36647	2.32028	5.69015	3.70122	2.84091	0.400478	3.61413	0.0328168	0.272935	3.70967	0.197357	0.238576	0.169722	5.03756	92.9857	148.128	25.0213	85.3522	36.0725	52.4256	11.4223	29.9076	9.30269	22.5906	8.65549	1.07935	3.02988	4.6792	2.77168	10.6866	3.14933	5.76572
28-04-20_DA42_n	ICU	1.79169	3.09105	1.17874	0.249967	0.13157	0.556372	0.573235	85.1592	2.02993	0.742496	20.7943	18.1005	7.78834	1.30253	2.16374	0.173904	0.587224	3.42752	3.882	2.85743	3.50285	0.536847	2.96595	0.163338	0.379128	2.08071	0.133352	0.119438	0.0767876	13.0601	149.443	156.418	27.4108	57.3435	39.1719	48.238	6.72701	18.0214	8.76146	17.0109	5.09136	1.22835	5.83076	10.1761	2.15066	11.185	3.44547	9.59717
28-04-20_DA43_n	ICU	2.65853	5.34645	4.53789	0.669363	0.373879	2.70273	1.93422	356.693	6.67996	3.95076	151.036	72.348	52.5454	6.57739	15.3211	0.767471	4.38563	10.8858	27.5903	11.3579	14.314	1.73214	14.3663	0.366545	0.818234	11.0037	0.645372	0.801936	0.139068	7.09896	227.905	309.605	82.4404	146.61	77.525	109.728	7.52142	65.4994	15.3309	51.9779	18.6234	1.00789	12.7805	11.6557	12.4086	25.633	3.76882	11.912
28-04-20_DA44_n	ICU	1.12121	2.79848	0.773116	0.369009	0.200322	0.484582	0.375039	69.4796	1.869	0.700155	26.7892	15.0743	3.91812	0.582959	3.21465	0.0745617	0.612839	1.80478	3.73177	1.37704	0.642716	0.142167	1.34138	0.0188053	0.0835027	1.03674	0.150683	0.183184	0.0711617	6.62024	105.275	87.0959	25.6845	47.1684	20.742	58.6486	8.02217	40.446	8.48725	19.5647	7.91548	0.746601	5.7697	3.53985	4.76136	7.40108	1.38076	5.80732
12-05-20_RIA1_n	ICU COVID-19	2.6644	4.97757	1.23238	0.0934125	0.113976	0.710501	0.154909	45.7638	0.823503	0.435452	12.9532	10.3918	3.44542	0.234578	1.66679	0.0347919	0.303804	0.781672	1.66907	0.82144	0.37546	0.0213521	0.736241	0.0129503	0.0487629	0.74486	0.239251	0.266517	0.104635	7.17506	162.151	195.993	17.6653	66.0076	19.5465	68.5337	4.14387	30.1597	8.1078	18.2636	5.30865	1.51276	2.8237	3.14639	1.85606	5.1498	1.06455	4.31988
12-05-20_RIA2_n	ICU COVID-19	3.60741	1.52405	0.442287	0.0846401	0.0196688	0.819508	0.00470493	9.44476	0.183517	0.105402	3.08013	3.11664	1.21756	0.0630702	0.48874	0.00214497	0.0698845	0.3125	0.701037	0.581651	0.369764	0.022305	0.679056	0.00116418	0.0200587	0.399171	0.0365515	0.0598932	0.00667358	9.02092	143.503	212.216	23.0067	72.5583	33.7321	71.7825	2.84824	30.5912	8.08905	12.716	4.34051	0.582164	6.78718	6.18295	4.0085	11.53	3.45297	9.46351
12-05-20_DA18_n	ICU COVID-19	3.92186	7.56535	2.14382	0.516491	0.196964	0.987912	0.619314	245.801	3.84713	3.00554	88.5326	85.0327	31.7792	1.38303	6.51958	0.321497	1.56588	6.19936	12.7013	14.2943	6.6886	0.223959	4.33209	0.0854054	0.205671	2.57576	0.640832	0.763291	0.413936	4.45628	168.009	283.713	38.2064	137.04	65.8111	68.1978	2.59097	33.2384	15.2602	29.7527	8.77133	3.10701	6.14951	11.4593	8.14629	25.9749	12.4839	8.62301
12-05-20_DA21_n	ICU COVID-19	5.33378	5.89229	2.18959	1.10097	1.24128	1.49436	1.31321	351.854	4.54339	4.13852	65.1049	54.1991	29.2613	2.76467	15.9137	1.1233	5.15857	9.65508	10.6445	4.5812	3.11828	0.261203	5.68957	0.104355	0.566303	7.41843	0.906255	0.892989	0.392661	6.56933	184.793	225.175	16.1319	60.9031	45.3804	133.252	75.2548	40.9461	21.7744	76.0223	12.8714	1.92039	3.77566	5.9116	1.72312	6.83362	1.74395	11.7535
27-04-20_DA4_n	ICU COVID-19	3.25408	7.59916	3.18112	1.23296	1.32893	1.13261	0.640729	162.565	2.69688	3.67012	64.4579	31.945	20.1221	1.84368	5.82276	0.626547	3.12613	4.32017	9.18838	6.57369	9.31484	0.952789	11.6024	0.192218	1.35966	16.5653	0.658698	0.762698	0.246321	5.55935	127.654	167.68	28.6032	89.6708	25.9862	51.8861	25.2022	31.1752	10.6138	29.2187	11.34	1.00702	4.32705	5.15639	3.24242	12.5716	2.50998	6.06632
27-04-20_DA5_n	ICU COVID-19	2.43146	6.92141	2.9351	1.08845	0.55438	2.12647	1.53791	260.215	6.22763	3.47454	110.362	46.393	33.8448	6.83486	11.8848	0.682048	4.0304	4.00833	9.19845	7.2818	12.2125	2.05456	17.808	0.479085	1.03546	11.3741	0.622242	0.758343	0.383767	6.03929	108.715	186.606	24.7284	97.0994	48.9814	62.7666	4.70123	32.9908	8.77106	25.2437	8.21082	1.11037	2.6015	2.76015	2.11737	6.28234	1.23594	3.67183
27-04-20_DA6_n	ICU COVID-19	3.08035	9.00545	4.46887	1.49067	1.52962	2.81858	1.44563	244.503	6.55495	2.866	64.6872	58.7681	28.7147	2.60505	10.3854	1.02797	4.05711	5.73906	8.91014	9.89228	10.9464	0.955633	13.1969	0.441344	1.9084	14.7474	0.518809	0.546293	0.301193	7.02951	146.204	191.706	24.1341	70.9504	33.3943	73.6468	29.4102	28.2829	16.0801	40.1331	8.70814	1.58307	3.49975	3.60242	2.22903	6.24356	1.59804	3.80456
27-04-20_DA8_n	ICU COVID-19	3.72679	4.9119	4.38667	0.507968	0.525888	0.868243	0.55207	152.842	3.89731	1.67658	50.0534	42.2671	20.5354	0.931409	3.19154	0.352926	1.6341	4.02813	11.3807	5.45062	5.52151	0.271449	4.3765	0.0661172	0.420078	4.82788	0.447814	0.418489	0.170135	16.1003	321.987	442.305	97.8839	196.321	77.7058	95.0151	23.4632	48.3489	20.1243	49.7366	13.3971	1.48059	15.898	20.9714	18.4999	40.4631	10.6399	16.4259
27-04-20_DA9_n	ICU COVID-19	2.38216	3.95847	4.18756	0.982698	2.09663	1.25557	0.811655	162.02	2.69264	2.43004	56.5267	36.4244	34.8337	2.74421	6.76656	0.479509	3.94829	3.36634	7.74843	9.08187	14.4686	1.01837	14.3931	0.312397	0.945884	10.4628	0.392385	0.437644	0.122991	4.97929	149.877	221.223	34.9131	87.5972	31.5497	54.6396	16.9776	29.0142	8.5933	32.0947	9.11559	0.834195	5.41426	3.74113	6.1265	7.69453	0.951226	2.37846
27-04-20_DA10_n	ICU COVID-19	2.50697	4.03103	3.6553	0.708761	0.413987	2.55234	0.495717	162.364	2.26699	2.22518	79.2445	31.3203	25.4607	2.70908	7.68777	0.237353	2.89982	2.8022	6.80368	4.97185	6.77715	0.613234	8.42474	0.121802	0.25651	5.42483	0.762676	0.872733	0.332674	3.66995	135.533	236.77	37.9543	125.999	39.2608	72.2103	6.11871	46.7357	8.9867	34.796	13.5492	0.959778	4.44061	4.2193	4.79545	8.80711	1.69906	3.77099
27-04-20_DA11_n	ICU COVID-19	2.4909	8.92725	7.57954	1.11358	1.73942	2.89424	0.531392	121.576	2.87755	1.39449	40.1645	48.6433	42.7211	3.72219	6.96927	0.755941	4.1354	5.98125	10.638	15.8962	25.8913	2.43147	20.3444	0.749775	1.78718	15.1054	1.24994	1.36351	0.637291	7.46355	159.32	204.193	34.234	82.6609	33.6434	53.388	13.4587	27.6654	11.1123	25.4739	7.25975	1.26024	5.77735	8.05661	4.9176	11.3031	3.54428	6.43947
28-04-20_DA14_n	ICU COVID-19	3.4598	7.11111	6.64605	0.619014	0.791548	0.901628	0.644072	186.292	4.57532	2.14125	66.499	60.9159	33.2773	1.69669	5.44794	0.712577	3.24539	5.33274	16.0586	14.2204	13.9768	0.783579	11.355	0.239364	1.26297	12.586	0.781669	0.718174	0.401705	12.7672	290.056	415.328	90.6691	189.906	72.4882	93.6177	18.4873	49.6249	19.8962	46.6156	12.6373	1.69985	14.9375	18.2171	18.9446	39.3092	10.328	12.7225
28-04-20_DA17_n	ICU COVID-19	1.99077	5.62554	1.46301	0.526176	0.394752	1.10378	0.302607	116.375	1.71951	1.76706	29.7761	33.8424	11.0814	1.2646	4.88135	0.399591	1.2601	3.90583	7.83658	13.2713	6.1645	0.905938	9.8483	0.393236	1.15492	9.4915	0.321128	0.383661	0.203869	4.29623	146.582	149.007	30.3307	60.0712	28.311	69.787	10.6876	26.7454	12.518	22.4499	4.58138	0.698278	8.10502	7.99813	9.72319	16.2566	5.15816	12.8898
21-04-20_DA1_n	ICU COVID-19	2.89013	2.46997	1.08257	0.386305	0.177653	1.69608	2.0078	198.052	4.9066	2.72877	72.9195	35.0987	20.3932	3.12602	6.78421	0.332669	1.41371	4.73057	8.06411	3.02718	3.32414	0.478732	3.58945	0.198813	0.223311	2.38989	0.752003	0.69796	0.302738	8.09709	100.247	157.453	23.8969	83.2998	50.3731	59.4496	2.46349	31.7066	9.76318	24.6134	8.91765	1.99628	2.50578	5.5091	1.4858	9.86483	1.96383	7.2931
21-04-20_DA2_n	ICU COVID-19	2.99427	7.43122	2.94579	1.17218	0.397206	1.00066	1.95239	219.875	4.98124	3.43635	67.6472	44.8153	35.6491	3.24855	14.142	0.444152	2.1783	2.99194	6.02942	5.70088	7.3122	0.709903	10.7458	0.287213	0.519739	5.7559	0.822301	1.20406	0.441843	6.18106	127.348	203.929	14.0498	86.3778	42.5326	101.897	5.77819	41.0538	12.3855	27.7479	5.3716	4.06425	1.7796	2.1979	1.83492	5.43999	1.08633	3.64101
27-04-20_DA3_n	ICU COVID-19	3.37778	3.97628	1.72404	0.597615	0.21099	1.01495	4.32106	310.319	9.93148	4.60149	100.035	74.1682	34.1539	2.86286	11.9534	0.458015	1.77523	14.9553	18.7068	12.2498	10.6543	0.853715	8.12461	0.554594	0.713177	4.88118	0.972648	1.33062	0.54635	30.1276	278.829	295.563	62.9307	142.216	66.6184	139.402	9.57237	52.2452	21.6896	40.2244	10.3926	7.99525	10.853	20.9337	6.36921	32.0425	12.2451	21.1097
27-04-20_DA12_n	ICU COVID-19	2.43851	11.1452	5.31667	1.71049	1.72548	1.5814	0.93473	139.19	2.92527	1.9099	37.2041	36.582	37.4339	3.24956	12.7042	0.845696	8.05986	3.16575	5.59436	8.22829	16.3046	1.22945	24.5257	0.685598	1.66597	28.1225	0.456201	0.627905	0.214346	6.89036	134.032	213.705	18.1324	70.357	33.5059	87.2606	6.301	29.4741	12.4863	55.2763	11.7535	1.66129	1.48868	2.04041	0.837269	3.4647	0.598227	2.72392
8-05-20_6NEG_n	NON-COVID-19	2.64388	10.1961	4.97658	2.24279	1.44927	1.32157	1.00732	303.595	4.11587	3.52833	95.2075	51.1066	31.7331	3.75324	17.6745	0.695823	6.06837	5.1468	8.51861	3.96412	4.39793	0.444849	8.63445	0.262935	0.399728	9.28795	0.801359	0.847804	0.33932	3.12339	86.3215	127.986	9.24722	51.2275	28.8769	84.7834	2.46583	40.6949	10.0913	40.9483	11.7101	1.27652	1.146	2.07464	0.694694	2.72631	0.649697	4.80693
8-05-20_20NEG_n	NON-COVID-19	2.64172	2.2546	0.721392	0.556722	0.29257	0.76216	2.28614	309.694	6.23127	3.78036	91.6059	57.5366	33.6931	4.88225	14.5268	0.607796	2.99698	4.09433	5.97829	3.53621	3.55896	0.467587	4.33046	0.0909767	0.248286	3.05827	0.974718	1.04327	0.365264	8.46321	124.531	222.867	23.8565	79.895	70.6505	111.81	8.34451	48.6901	16.4045	44.4508	12.8584	3.24698	1.36875	1.89417	0.85289	3.27436	0.626357	3.50805
8-05-20_21NEG_n	NON-COVID-19	2.7541	1.82937	0.662757	0.276166	0.150893	0.816938	0.269016	113.942	1.48646	1.16467	36.7812	22.9446	6.50953	0.837647	1.82438	0.0822615	0.547036	2.2894	3.30351	2.06755	1.4272	0.149664	1.49921	0.0111781	0.0803546	1.25219	0.282122	0.191257	0.116663	10.7244	149.227	195.203	30.0848	100.734	35.3367	47.388	3.88534	22.6394	6.63633	17.9922	5.75841	0.928251	3.77432	9.41919	2.91842	12.4782	3.31296	9.22898
8-05-20_22NEG_n	NON-COVID-19	2.61784	2.41758	0.667481	0.371502	0.198077	0.673934	1.79111	267.094	7.18597	4.02363	89.9583	64.4974	18.9525	2.94881	6.53383	0.280597	2.22789	3.98719	6.56442	5.63399	3.43504	0.677701	3.76405	0.0522979	0.193283	4.64744	0.652266	0.895662	0.366422	10.6508	155.057	162.672	31.9036	89.198	57.3284	58.2941	5.3593	30.0478	11.8353	30.9113	10.9957	2.75182	2.5927	3.55805	1.88652	7.42416	2.41634	4.58992
8-05-20_28NEG_n	NON-COVID-19	2.72481	1.75942	0.569389	0.410519	0.185835	1.07748	2.26402	208.029	3.46789	3.01562	81.5533	46.095	23.6342	2.97098	14.953	0.251045	1.91383	2.61623	3.97929	4.61853	1.84591	0.332397	3.22307	0.0935521	0.0929598	2.05202	0.908473	1.20898	0.433232	4.956	120.085	122.956	22.1544	62.4248	38.428	111.008	6.5538	63.4087	13.1593	29.6391	10.4913	1.84481	1.71666	1.13025	1.44723	2.44978	0.900055	3.46009
8-05-20_29NEG_n	NON-COVID-19	3.08031	1.73726	0.603436	0.483238	0.173405	0.808226	1.52503	305.735	6.81675	2.70105	64.2652	50.4354	20.5352	2.06051	8.23588	0.432302	1.78133	3.93759	4.48603	2.68005	2.42112	0.214781	2.80122	0.0504903	0.186131	1.99443	1.06041	0.828516	0.436695	18.8393	230.692	261.847	20.1496	92.2724	48.8809	107.925	6.05836	40.6409	17.1902	42.4122	9.70534	3.89826	2.24802	3.80092	0.918746	4.61311	1.32035	5.39336
8-05-20_30NEG_n	NON-COVID-19	2.47204	2.08375	0.721361	0.476056	0.132227	0.589504	1.71581	224.598	4.4419	2.33636	45.2505	33.5468	12.3794	1.93519	7.15459	0.226317	1.26237	3.26077	3.92102	2.6335	1.18847	0.1335	1.48334	0.0424537	0.0731835	1.02568	1.12866	0.89196	0.724604	14.5955	147.695	169.358	20.3806	64.1607	43.7567	87.0249	5.9991	30.4966	11.3394	28.956	6.69355	2.2099	3.28524	3.6747	1.56964	5.33452	1.34951	5.27405
8-05-20_32NEG_n	NON-COVID-19	2.2636	1.77145	0.823447	0.459116	0.142897	0.942179	0.66177	234.747	2.85719	1.80311	43.7619	37.5302	11.1329	0.792098	9.54692	0.368011	1.07365	5.72409	5.90991	3.77082	1.5711	0.110328	3.12127	0.213088	0.379638	2.30915	0.486287	0.581206	0.229192	6.00461	168.119	175.483	15.4156	49.3452	16.8149	111.434	2.3113	46.6505	16.7	28.6587	6.64051	1.38752	5.11897	6.34095	2.05376	5.64955	1.86132	8.26978
8-05-20_35NEG_n	NON-COVID-19	4.26017	4.32944	1.36176	0.834625	0.384475	0.811052	1.06856	240.912	2.81695	3.83677	87.0119	45.0396	16.1685	2.28094	8.91144	0.382614	2.13522	5.19737	10.2348	3.58369	2.22211	0.271771	4.38738	0.0601369	0.273122	4.41536	0.397968	0.466712	0.219169	4.53669	53.5519	166.608	18.5779	72.4394	31.7514	62.4716	4.30434	29.0987	8.59388	23.8783	6.78023	1.60937	2.9899	4.67291	2.21593	8.82069	1.93007	6.85563
8-05-20_37NEG_n	NON-COVID-19	0.50001	3.34078	1.10784	1.04672	0.387682	0.51595	1.82582	337.106	6.38718	5.05136	98.8304	54.4585	15.9195	3.99264	16.7372	0.797289	3.17662	3.95087	5.58603	3.00035	1.76544	0.354264	3.90421	0.12105	0.303732	2.61598	1.15142	1.15773	0.470078	4.96977	109.746	109.319	8.16114	49.8286	48.7033	99.098	4.94008	42.0876	17.1776	38.6241	11.6942	0.917466	1.36545	1.43691	0.694133	2.2421	0.496855	3.38773
8-05-20_46NEG_n	NON-COVID-19	0.257263	4.22305	0.946274	0.687451	0.162658	0.824682	2.47549	265.095	8.3526	3.34912	94.4379	65.2211	18.4397	2.95692	10.443	0.304196	1.43756	1.65248	2.90957	2.36904	1.33825	0.24245	1.87971	0.054943	0.0847906	0.783599	1.07305	1.22875	0.632408	8.00874	110.882	114.392	21.7187	62.2783	37.0168	71.3206	3.83528	41.5875	13.2744	18.0851	5.98027	2.62024	0.546739	0.512375	0.389007	0.961271	0.354234	1.11916
27-04-20_5NEG_n	NON-COVID-19	1.92875	1.72187	0.560961	0.31124	0.129597	0.778535	2.57243	264.964	7.3791	3.4926	106.93	79.3948	41.7113	4.54874	13.0757	0.555511	2.16729	3.98619	6.54806	6.4727	4.21833	0.483512	4.36586	0.118043	0.226767	1.90605	0.580133	0.79142	0.307097	9.76611	159.153	184.828	37.5099	105.318	56.5601	100.462	9.35667	57.1909	19.4508	32.9727	10.4781	3.54241	1.59257	2.12299	1.2842	4.71159	1.56622	4.37904
27-04-20_16NEG_n	NON-COVID-19	1.88875	2.90544	0.836632	0.621899	0.211161	5.85852	2.98617	265.296	7.89702	4.24159	94.2485	57.3082	30.975	5.58108	13.9029	0.478313	2.67782	4.7668	7.03452	5.02478	3.23337	0.610711	4.68881	0.0749946	0.209037	2.71275	0.702191	0.99191	0.377264	5.98955	90.3367	114.151	18.0052	58.2025	41.2047	53.2473	4.94554	28.5443	7.81704	28.7751	6.55351	1.64767	1.75738	1.82301	1.17404	3.43746	1.28069	4.5331
30-04-20_12NEG_n	NON-COVID-19	1.69656	2.62693	1.42305	0.76169	0.368705	0.699417	1.72491	303.202	4.83533	3.68796	77.585	32.9508	19.7075	3.70044	17.6583	0.477511	3.23348	5.78971	7.05908	2.57997	1.39369	0.199383	2.03576	0.103537	0.114527	2.84629	0.582382	0.703163	0.33366	5.32135	116.772	201.608	17.9437	77.4267	66.196	163.969	7.62994	68.7975	14.5713	62.5827	13.7247	4.38575	3.42531	4.29415	1.51247	5.51373	1.16191	7.40764
30-04-20_19NEG_n	NON-COVID-19	2.2197	1.85279	0.527419	0.241665	0.098927	0.668164	1.70717	192.041	5.2648	5.01446	102.878	77.2229	51.4246	5.94216	14.3685	0.472151	1.70217	3.20299	5.43608	13.2201	5.11511	0.644926	3.3779	0.0835594	0.142175	1.0969	0.776471	1.00348	0.396018	3.68675	90.0286	107.983	32.6951	85.9127	44.6307	67.7474	4.20798	57.8147	16.4195	17.1917	7.79353	1.91132	2.29856	1.78301	3.16212	8.11631	2.79045	3.16067
8-05-20_26NEG_n	NON-COVID-19	2.37918	4.97697	1.55496	0.764995	0.284134	0.927325	0.699398	200.483	2.56054	2.01352	38.5404	30.2054	15.5437	2.5875	9.37935	0.397995	1.77946	4.92514	5.02085	2.71811	2.0523	0.328634	3.55319	0.136154	0.291382	3.00235	0.543785	0.455961	0.204985	7.36724	128.646	209.811	12.3475	48.8855	52.7478	97.928	4.2684	35.499	11.8153	30.719	6.68959	2.87406	3.79071	5.00768	1.01974	4.01547	0.979784	8.8118
[truncated: 41 more columns]

## Sheet: mod. COVID-19 vs HEALTHY_ +
Modulated lipids (analyzed in positive mode) in COVID-19 patients respect to healthy subjects (fold change >1.5 and p-value<0.05)
Name	FC	p-value
CAR 10:0	2.0216	0.018951
CAR 10:1	1.906	0.0078031
CAR 11:1	1.8268	0.002789
CAR 12:0	1.8789	0.0073164
CAR 14:0	3.0048	5.2841e-07
CAR 14:1	2.6822	0.00080882
CAR 14:2	2.5381	0.0074408
CAR 16:0	2.6625	1.8501e-07
CAR 16:1	4.7696	2.2537e-08
CAR 18:0	2.113	2.1312e-06
CAR 18:1	3.8939	1.2305e-05
CAR 18:2	3.1137	0.00086293
CAR 20:1	6.1203	1.9763e-07
CAR 20:2	5.3796	0.00081574
CAR 20:3	2.4546	0.028147
CAR 20:4	5.9425	0.00021888
CAR 8:0	2.0051	0.028189
CAR 8:1	1.6301	0.00048098
CE 18:3	0.59848	0.0006207
CE 24:6	3.4301	0.0014415
CE 26:6	2.4218	0.00018148
DG 17:0	0.27434	4.2688e-06
DG 24:3	0.25482	4.3892e-10
DG 25:0	0.50962	0.011041
DG 25:1	0.42578	0.014631
DG 26:1	0.47864	0.019951
DG 30:6	0.26544	3.7097e-11
DG 31:3	0.47232	0.039961
DG 34:2	7.9701	2.7698e-06
DG 36:1 DG 18:0_18:1	0.56413	0.0092844
DG 36:2 DG 18:1_18:1	0.59677	2.9471e-05
DG 36:3 DG 18:1_18:2	0.55902	5.1244e-07
DG 36:4 DG 18:2_18:2	0.62318	0.01349
DG 38:10	0.30667	1.1169e-08
DG 38:2	0.26428	1.049e-07
DG 38:3	0.16131	1.6139e-11
DG 38:5 DG 18:1_20:4	0.49535	1.0935e-06
DG 38:6 DG 18:2_20:4	0.54418	0.0022039
DG 40:2	0.43898	1.0348e-07
DG 40:3	0.21162	6.3805e-09
DG 40:4	0.25305	2.0935e-07
DG 40:5	0.18346	8.8224e-06
DG 40:6	0.55243	0.0084507
DG 40:6 DG 16:0_24:6	0.42691	0.00025133
DG 41:5	0.11189	3.3528e-13
DG 42:11 DG 20:5_22:6	0.099646	2.2112e-14
DG 44:6 DG 18:0_26:6	0.52512	0.015294
DG 50:1 DG 16:0_34:1	0.19427	9.9621e-14
DG 52:1 DG 34:0_18:1	0.17258	1.0493e-13
DG 52:2 DG 16:0_36:2	0.31066	1.4626e-06
LPC 16:0/0:0	1.6747	8.3757e-06
LPC 18:0	1.8004	0.012891
LPC 18:2/0:0	0.43436	8.2692e-12
LPC 18:3/0:0	2.0377	2.7389e-06
LPC 19:1/0:0	1.6644	0.0019897
LPC 20:1/0:0	1.8559	2.0054e-07
LPC 20:4	1.5895	0.020872
LPC 22:4/0:0	1.9064	4.3119e-05
LPC 22:5/0:0	1.5969	0.0022403
LPC 22:6	2.0294	0.0051626
LPC 22:6/0:0	1.5486	0.022794
LPC 24:0/0:0	0.55072	3.8145e-07
LPC O-16:0	1.968	3.7206e-06
LPC O-18:0	1.9024	8.0697e-05
LPC O-18:1	2.9966	3.776e-11
LPC O-18:2	1.5126	0.0029907
LPE 16:0	1.6299	1.6023e-05
LPE 18:0	1.6983	2.2242e-05
LPE 18:2	0.62345	0.0088315
LPE 20:4	1.6256	0.024579
LPE 20:5	0.64074	0.028672
LPE 22:4	2.0865	0.032216
LPE 22:5	2.6122	0.0020969
LPE 22:6	2.3974	0.00026963
LPE O-16:1	1.8424	0.00015838
LPE O-18:1	1.6356	0.0030951
LPE O-18:2	2.4017	4.6942e-06
MG 15:1	1.6636	0.00011884
NAE 18:1	1.8287	1.2636e-06
NAE 18:2	1.5696	0.00013351
NAE 20:2	1.5957	8.1e-05
NAE 22:4	2.0244	2.4136e-05
NAE 22:5	2.2589	2.8346e-06
PC 30:0	1.8896	0.02207
PC 32:0 PC 16:0_16:0	1.7085	6.0379e-07
PC 32:1	2.3872	0.00069412
PC 32:2PC 14:0_18:2	0.39473	7.4736e-15
PC 34:3 PC 16:1_18:2	0.57235	1.5589e-10
PC 34:4 PC 14:0_20:4	0.41208	5.879e-08
PC 35:4	2.7405	1.0044e-06
PC 35:4 PC 15:0_20:4	0.66058	1.1661e-07
PC 36:4	1.7307	3.903e-05
PC 36:5 PC 16:0_20:5	0.56108	4.7758e-06
PC 36:6 PC 14:0_22:6	0.30492	3.1453e-17
PC 37:2 PC 19:0_18:2	0.64491	5.1524e-07
PC 38:2 PC 18:0_20:2	0.66605	1.7654e-05
PC 38:3 PC 18:0_20:3	0.6622	6.8555e-06
PC 38:7 PC 16:1_22:6	0.44309	1.0966e-16
PC 39:7 PC 17:1_22:6	1.5133	0.0025976
PC 40:5	1.5806	0.00010527
PC 40:6	1.6086	0.00040819
PC 40:8 PC 20:4_20:4	0.48169	7.2158e-10
PC 42:9	0.50712	2.9969e-06
PC O-34:2	0.55591	1.3653e-08
PC O-36:6	0.64096	0.0079693
PC O-42:10	2.5676	0.00049461
PC O-46:4	0.62681	0.00011796
PE 34:1 PE 16:0_18:1	1.9365	0.0003426
PE 36:2 PE 18:0_18:2	0.53263	1.6783e-14
PE 36:4	2.1519	1.4237e-06
PE 37:6	1.6746	0.0020139
PE 38:5	2.1527	3.2775e-05
PE 38:6	2.4403	1.9956e-06
PE 38:6 PE 16:0_22:6	1.9135	0.00011684
PE 40:6 PE 18:0_22:6	1.9729	1.1997e-05
PE 40:7	3.6568	6.5814e-06
PE P-34:1 PE P-16:0_18:1	0.62732	4.5356e-06
PE P-34:2 PE P-16:0_18:2	0.34297	2.5881e-13
PE P-36:1 PE P-18:0_18:1	0.49565	4.5171e-10
PE P-36:2 PE P-18:0_18:2	0.36629	1.2317e-13
PE P-38:2 PE P-20:0_18:2	0.33825	4.758e-14
PE P-38:4 PE P-18:0_20:4	0.57109	9.454e-08
PE P-38:5 PE P-18:1_20:4	0.45308	1.8983e-15
PE P-38:6 PE P-16:0_22:6	0.60499	6.292e-09
PE P-40:5 PE P-18:0_22:5	0.62711	3.1307e-06
PE P-40:5 PE P-20:0_20:5	0.66207	7.6228e-05
PE P-40:6 PE P-18:0_22:6	0.56353	1.3948e-08
PE P-40:7 PE P-18:1_22:6	0.60297	7.361e-07
PI 32:1	0.62141	0.010605
PI 36:1	0.65137	0.010306
PI 36:3	0.38991	0.001441
PI 38:3	0.64749	0.0071921
PI 40:4	0.37169	0.00019671
SM 28:1 2O SM 18:1 2O/10:0	0.48685	0.00025409
SM 30:1 2O SM 16:1 2O/14:0	0.42546	0.00032989
SM 31:1 2O SM 17:1 2O/14:0	0.26911	0.00042545
SM 32:0 2O	0.47291	0.0041338
SM 32:1 2O	0.59227	0.013778
SM 32:1 2O SM 16:1 2O/16:0	0.59481	0.014668
SM 32:1 3O	0.38022	0.0022947
SM 32:5 2O	2.4073	0.012061
SM 33:1 2O SM 17:1 2O/16:0	0.66322	0.046299
SM 33:2 2O SM 17:2 2O/16:0	0.40796	0.0029287
SM 34:0 2O	1.8724	4.8428e-05
SM 34:0 3O	0.39305	4.0455e-05
SM 34:1 2O	2.054	1.3233e-06
SM 34:7 3O	2.6024	3.5699e-08
SM 36:1 3O	1.8795	0.034619
SM 36:2 2O	2.7242	4.4622e-05
SM 36:3 2O SM 18:1 2O/18:2	0.60834	0.010261
SM 37:2 2O SM 18:1 2O/19:1	0.65944	0.02439
SM 38:1 2O SM 16:1 2O/22:0	0.50928	0.0049351
SM 38:1 3O	1.7458	0.018325
SM 38:2 2O	1.7313	0.003823
SM 38:2 2O SM 18:2 2O/20:0	0.64243	0.012357
SM 39:1 2O SM 17:1 2O/22:0	0.40935	0.00088749
SM 39:2 2O SM 18:2 2O/21:0	0.56324	0.0068299
SM 40:1 2O SM 18:1 2O/22:0	0.51213	0.005096
SM 40:2 2O SM 18:2 2O/22:0	0.54378	0.0062817
SM 41:1 2O SM 18:1 2O/23:0	0.4878	0.0016189
SM 41:2 2O SM 17:1 2O/24:1	0.55856	0.0078926
SM 41:2;3O	0.47601	0.00015687
SM 41:3;3O	0.46755	0.0001398
SM 41:8;2O	0.45381	1.2825e-05
SM 42:4;2O	2.3133	0.00017236
SM 44:9;3O	1.6187	0.0086621
TG 36:3|TG 8:0_10:0_18:3	7.3015	0.00020079
TG 42:0|TG 12:0_14:0_16:0 [M+NH4]+ & [M+Na]+	0.32674	0.035241
TG 42:3|TG 8:0_16:1_18:2	1.7324	0.00049372
TG 43:0|TG 12:0_15:0_16:0	0.56232	0.0017605
TG 44:0|TG 10:0_16:0_18:0 [M+NH4]+ & [M+Na]	0.29827	1.7681e-06
TG 44:1|TG 10:0_16:0_18:1 [M+NH4]+ & [M+Na]	0.42617	0.0031215
TG 46:0|TG 12:0_16:0_18:0	0.52349	5.6184e-06
TG 46:0|TG 14:0_16:0_16:0	0.48414	5.1773e-05
TG 46:1|TG 14:0_16:0_16:1 [M+NH4]+ & [M+Na]	0.44313	0.00013048
TG 46:2|TG 12:0_16:1_18:1 [M+NH4]+ & [M+Na]	0.51251	0.0040737
TG 48:3|TG 14:0_16:1_18:2	0.59525	0.0047322
TG 51:1|TG 16:0_17:0_18:1 [M+NH4]+ & [M+Na]	1.5993	0.00098617
TG 51:2|TG 16:0_17:1_18:1	1.6235	0.00038044
TG 51:2|TG 17:0_16:1_18:1	1.658	4.7649e-08
TG 51:3|TG 15:0_18:1_18:2 [M+NH4]+ & [M+Na]	1.5354	0.00018157
TG 52:2|TG 16:0_18:1_18:1 [M+NH4]+ & [M+Na]	1.6937	9.2717e-10
TG 52:3|TG 16:0_18:1_18:2 [M+NH4]+ & [M+Na]	1.6452	8.7469e-10
TG 52:4|TG 16:1_18:1_18:2 [M+NH4]+ & [M+Na]	1.5385	0.00042193
TG 52:6|TG 16:1_18:2_18:3	1.664	4.4399e-08
TG 53:2|TG 16:0_18:1_19:1	1.9367	5.4076e-13
TG 53:3|TG 17:0_18:1_18:2 [M+NH4]+ & [M+Na]	1.782	3.3064e-06
TG 53:4|TG 17:1_18:1_18:2 [M+NH4]+ & [M+Na]	1.5034	0.00096798
TG 54:2|TG 16:0_18:1_20:1	1.7499	1.0591e-10
TG 54:2|TG 18:0_18:1_18:1	1.67	0.00013939
TG 54:3|TG 18:0_18:1_18:2 [M+NH4]+ & [M+Na]	1.6287	2.3895e-05
TG 54:4|TG 16:0_18:1_20:3	1.5458	1.0922e-08
TG 54:4|TG 18:1_18:1_18:2	1.5808	0.00014808
TG 54:5|TG 16:0_18:1_20:4	1.6564	6.3359e-08
TG 54:5|TG 18:1_18:2_18:2	1.5741	0.014482
TG 54:6|TG 16:0_18:2_20:4	1.6682	4.0936e-05
TG 54:6|TG 18:1_18:2_18:3	1.7785	0.021716
TG 54:7|TG 16:1_18:2_20:4	1.8624	0.0027059
TG 55:1|TG 16:0_21:0_18:1	1.6162	8.1992e-05
TG 55:3|TG 19:0_18:1_18:2	1.9527	0.0027646
TG 55:4|TG 18:1_19:1_18:2	1.9277	1.5601e-08
TG 55:5|TG 19:1_18:2_18:2	1.5841	5.7141e-05
TG 55:6|TG 17:0_18:2_20:4	1.7191	0.0062691
TG 56:3|TG 20:0_18:1_18:2	1.8493	5.6196e-10
TG 56:4|TG 18:0_18:1_20:3	2.2333	9.5609e-12
TG 56:5|TG 18:0_18:1_20:4 [M+NH4]+ & [M+Na]	2.0949	1.9989e-09
TG 56:6|TG 16:0_18:1_22:5	1.9157	7.8278e-08
TG 56:6|TG 18:0_18:2_20:4	1.8139	2.1441e-10
TG 56:7|TG 16:0_18:1_22:6	1.8858	4.9316e-05
TG 56:7|TG 18:1_18:2_20:4	1.7001	0.0084893
TG 56:8|TG 16:0_18:2_22:6 [M+NH4]+ & [M+Na]	1.9582	0.0010037
TG 57:0|TG 16:0_17:0_24:0	1.6513	3.7081e-06
TG 57:2|TG 16:0_23:0_18:2	1.8297	2.0764e-06
TG 57:8|TG 17:1_18:1_22:6	1.8618	0.0081865
TG 58:10|TG 16:0_20:4_22:6	1.7471	0.03032
TG 58:6|TG 16:0_18:1_24:5	2.1546	1.7848e-12
TG 58:6|TG 18:0_18:1_22:5	1.8491	1.174e-06
TG 58:7|TG 18:0_18:1_22:6 [M+NH4]+ & [M+Na]	1.5329	0.014962
TG 58:8|TG 18:1_18:2_22:5 [M+NH4]+ & [M+Na]	2.1173	6.612e-06
TG 58:9|TG 18:1_18:2_22:6 [M+NH4]+ & [M+Na]	1.8669	0.0011091
TG 59:4TG 23:0_18:2_18:2	1.7926	0.035529
TG 60:10|TG 18:0_20:4_22:6	1.5545	0.049781
TG 60:4|TG 18:1_24:1_18:2	1.6161	0.034541
TG 60:7|TG 18:1_18:2_24:4	1.5009	0.0020614

## Sheet: mod. COVID-19 vs HEALTHY_ -
Modulated lipids (analyzed in negative mode) in COVID-19 patients respect to healthy subjects (fold change >1.5 and p-value<0.05)
name	FC	p-value
PE O-38:6|PE O-18:2_20:4	0.50993	9.8877e-16
PE O-34:3|PE O-16:1_18:2	0.39503	4.6257e-15
PE O-36:4|PE O-18:2_18:2	0.39936	7.0215e-15
PC O-34:3|PC O-16:1_18:2	0.49508	2.151e-13
FA 20:4	8.4038	5.7668e-13
LPC 18:2	0.46901	2.5693e-12
PE O-36:5|PE O-16:1_20:4	0.58313	3.8255e-12
FA 18:1	4.4555	7.2751e-12
PE O-36:3|PE O-18:1_18:2	0.44542	1.8981e-11
PE O-38:5|PE O-18:1_20:4	0.61222	7.0222e-09
SM 41:1;2O|SM 18:1;2O/23:0	0.6391	3.5578e-08
PE O-38:5|PE O-16:1_22:4	0.62382	1.3315e-07
LPC 16:0	1.7243	1.3985e-07
LPE 18:0	1.9033	1.6258e-07
FA 22:6	4.0812	1.7391e-07
LPE O-18:2	2.4639	3.3669e-07
PE 40:6|PE 18:0_22:6	2.3738	3.7474e-07
PE 38:6|PE 16:0_22:6	2.3226	5.9192e-07
FA 18:2	4.7018	8.5803e-07
LPE 16:0	1.7958	1.1455e-06
PE 38:6|PE 18:2_20:4	2.3651	1.6482e-06
PE 38:4|PE 18:0_20:4	1.7075	4.8759e-06
PE 34:1|PE 16:0_18:1	2.3776	1.5467e-05
PE 36:4|PE 16:0_20:4	1.8739	1.6047e-05
PI 38:3|PI 180:_20:3	0.63791	2.5453e-05
LPE O-16:1	1.9074	2.9832e-05
LPE 22:6	2.5825	9.1076e-05
LPC 17:0	1.6011	0.00016162
PI 36:3|PI 18:1_18:2	0.5251	0.00019292
PC 36:5|PC 16:0_20:5	0.65354	0.00034565
LPC 22:5	1.7454	0.00049485
LPC 22:6	1.8695	0.00052633
LPE O-18:1	1.6799	0.0010852
LPE 22:5	2.6258	0.0011152
PE 34:2|PE 16:0_18:2	1.5436	0.0034671
FA 44:5	2.5404	0.0057995
LPE 18:2	0.64444	0.008317
PI 40:5|PI 18:0_22:5	1.5027	0.010549
LPE 22:4	2.454	0.01369
LPE 20:4	1.6389	0.014731
ST 28:1;OS	1.5644	0.020911

## Sheet: mod. ICU COVID-19 vs ICU_+
Modulated lipids (analyzed in positive mode) in ICU COVID-19 patients respect to ICU patients (fold change >1.5 and p-value<0.05)
Name	FC	p-value
CAR 12:0	0.33719	5.0748e-05
CAR 14:0	0.61949	0.032845
CAR 14:1	0.33348	0.0009733
CAR 14:2	0.50504	0.006808
CAR 16:1	0.5571	0.016477
CE 20:5	0.17144	0.040391
DG 17:0	0.27012	0.0091392
DG 36:2	0.47851	0.036756
DG 37:7	0.09945	0.011966
DG 41:5	0.20273	0.00083925
DG 52:2|DG 16:0_36:2	0.45112	0.03245
LPE 18:0	0.62895	0.015622
NAE 14:0	0.29599	9.9823e-06
NAE 16:0	0.50145	0.0003374
PC 35:3|PC 17:1_18:2	1.5606	0.022498
PC 38:2|PC 18:0_20:2	0.6226	0.010435
PC 38:3|PC 18:0_20:3	0.56226	0.00092606
PC 39:7|PC 17:1_22:6	1.653	0.048501
PC O-29:0	0.43623	0.00025459
PC O-38:8	2.0827	0.036806
PC O-39:4	0.53157	0.0047413
PE 34:1|PE 16:0_18:1	0.61394	0.014267
PE 36:4|PE 18:2_18:2	0.60759	0.0086401
PE 40:6|PE 18:0_22:6	0.66234	0.044403
PE P-36:4|PE P-16:0_20:4	0.66459	0.025332
PI 38:6	0.6136	0.046477
SM 30:1;2O|SM 16:1;2O/14:0	0.61684	0.022543
SM 31:1;2O|SM 17:1;2O/14:0	0.38342	0.0017225
SM 32:0;2O	0.5678	0.0034187
SM 32:1;3O	0.47394	0.0039453
SM 33:2;2O|SM 17:2;2O/16:0	0.651	0.044154
SM 36:1;3O	9.4045	0.005639
SM 36:2;2O	3.0885	0.019495
SM 36:3;2O|SM 18:1;2O/18:2	0.62431	0.030016
SM 38:1;3O	4.6917	0.0022076
SM 38:2;2O	2.5353	0.045814
SM 42:5;2O|SM 18:1;2O/24:4	0.46164	0.0078897
TG 42:3|TG 8:0_16:1_18:2	2.2134	0.026542
TG 48:4|TG 12:0_16:0_20:4	1.739	0.042906
TG 49:3|TG 15:0_16:1_18:2	1.7476	0.028508
TG 50:0|TG 16:0_16:0_18:0	1.7458	0.049524
TG 50:4|TG 16:1_16:1_18:2	14.856	0.022561
TG 51:5|TG 15:0_18:2_18:3	2.331	0.025752
TG 52:0|TG 16:0_18:0_18:0	2.6256	0.0021474
TG 52:6|TG 14:1_18:1_20:4	2.1944	0.010365
TG 53:0|TG 16:0_18:0_19:0	2.4749	0.010201
TG 53:3|TG 17:0_18:1_18:2	1.5281	0.022296
TG 54:0|TG 16:0_18:0_20:0	2.1226	0.022178
TG 54:1|TG 160_180_201	1.8424	0.0015369
TG 54:1|TG 18:0_18:0_18:1	2.2387	0.033726
TG 54:4|TG 16:0_18:1_20:3	1.5843	0.001225
TG 54:4|TG 18:1_18:1_18:2	1.5469	0.027773
TG 54:5|TG 16:0_18:1_20:4	1.6815	0.0017573
TG 54:6|TG 16:0_18:2_20:4	1.9671	0.012569
TG 55:0|TG 15:0_16:0_24:0	2.8389	0.0053753
TG 55:1|TG 16:0_21:0_18:1	2.6164	0.0023215
TG 55:4|TG 18:1_19:1_18:2	2.0855	0.0013691
TG 55:5|TG 19:1_18:2_18:2	1.8646	0.013306
TG 56:0|TG 16:0_18:0_22:0	2.3729	0.0026169
TG 56:1|TG 16:0_22:0_18:1	3.6133	0.011164
TG 56:2|TG 18:0_18:1_20:1	2.0748	0.0041165
TG 56:3|TG 18:1_18:1_20:1	1.5858	0.047056
TG 56:7|TG 16:0_18:1_22:6	1.6698	0.011084
TG 56:7|TG 18:1_18:2_20:4	1.8084	0.026436
TG 56:8|TG 16:0_18:2_22:6	1.8095	0.027052
TG 57:1|TG 16:0_23:0_18:1	2.8064	0.00046289
TG 57:2|TG 16:0_23:0_18:2	2.2656	9.5635e-05
TG 57:8|TG 17:1_18:1_22:6	2.3672	0.012195
TG 58:0|TG 16:0_18:0_24:0	2.9471	0.020212
TG 58:1|TG 18:0_22:0_18:1	3.984	0.020081
TG 58:10|TG 16:0_20:4_22:6	3.6116	0.0082735
TG 58:2|TG 16:0_18:1_24:1	4.3024	0.042523
TG 58:9|TG 18:1_18:2_22:6	1.7305	0.019178
TG 59:2|TG 23:0_18:1_18:1	3.82	0.0033164
TG 60:1|TG 18:0_24:0_18:1	3.7428	0.025956
TG 60:2|TG 24:0_18:1_18:1	4.2491	0.047624

## Sheet: mod. ICU COVID-19 vs IC_ -
Modulated lipids (analyzed in negative mode) in ICU COVID-19 patients respect to ICU patients (fold change >1.5 and p-value<0.05)
Name	FC	p-value
PI 38:3|PI 18:0_20:3	0.58174	0.00052118
FA 16:4	1.5079	0.00097271
ST 29:1OS	1.6017	0.026954
ST 27:1OS	1.5783	0.038288

## Sheet: mod COVID-19 vs ICU COVID-19_ +
Modulated lipids (analyzed in positive mode) in COVID-19 patients respect to ICU COVID-19 patients (fold change >1.5 and p-value<0.05)
Name	FC	p-value
CAR 11:1	1.7119	0.026136
CAR 12:0	3.56	0.00048666
CAR 13:1	1.9796	0.00013447
CAR 14:0	2.0009	0.001316
CAR 14:1	3.7103	0.0011042
CAR 14:2	2.5864	0.023406
CAR 16:0	1.5844	0.010437
CAR 16:1	2.2937	0.00058066
CAR 18:1	1.7914	0.029795
CAR 9:0	1.6173	0.020609
CE 16:0	0.33779	0.00046143
CE 18:1	0.40364	0.00031278
CE 18:2	0.47055	7.9138e-05
CE 18:3	0.36046	0.00030051
CE 20:3	0.51883	0.0050221
CE 22:5	0.57417	0.0066877
CE 24:6	0.44381	0.00013729
CE 26:6	0.54447	0.00014866
DG 17:0	4.2781	0.034081
DG 34:1	1.7152	0.00063206
DG 34:2	4.804	0.00030735
DG 37:7	5.365	0.0046744
DG 38:10	2.4656	0.0095734
DG 38:2	1.9363	0.034713
DG 40:3	2.5314	0.010054
DG 40:4	3.0549	0.0094361
DG 41:5	4.0852	0.025195
DG 52:2|DG 16:0_36:2	2.1722	0.014714
LPC 14:0/0:0	1.7124	0.012459
LPC 15:0/0:0	1.6972	0.0018434
LPC 16:0/0:0	1.5701	0.0013557
LPC 17:0	1.5475	0.0051759
LPC 20:1/0:0	1.5242	0.0013545
LPC 20:4/0:0	1.7222	0.0049528
LPC 20:5/0:0	0.52004	0.0070391
LPC 26:0/0:0	1.6967	0.0042097
LPC O-16:0	2.2073	2.1289e-05
LPC O-16:1	1.8666	0.0007787
LPC O-18:0	1.9751	0.00062509
LPC O-18:1	1.8852	8.7177e-05
LPC O-18:2	1.7932	0.0012202
LPC O-24:1	2.2897	0.00097389
LPE 18:1	0.59813	0.0019478
LPE 18:2	0.45544	0.0011432
LPE 20:4	0.5527	0.0039695
LPE 20:5	0.43169	0.00096552
LPE 22:4	0.55082	0.02227
LPE 22:5	0.51086	0.0024577
LPE 22:6	0.56584	0.0056659
MG 15:1	1.5211	0.0061994
MG 17:1	2.6043	0.00014633
MG 21:1	1.6288	0.0034367
NAE 14:0	2.6002	0.00041048
NAE 18:2	1.5787	0.0004839
NAE 20:5	1.6877	5.1592e-06
NAE 20:2	1.6905	0.00029791
NAE 20:4	1.652	3.3714e-05
PC 30:0|PC 14:0_16:0	1.5195	0.013335
PC 34:2	1.7004	1.5452e-05
PC 36:5	0.37966	5.942e-06
PC 36:4|PC 16:0_20:4	1.5473	6.0457e-05
PC 36:4|PC 18:2_18:2	1.5863	0.00010544
PC 36:5|PC 16:0_20:5	0.4112	0.00028528
PC 37:4|PC 17:0_20:4	1.5518	0.00025979
PC 38:4|PC 18:0_20:4	1.6653	8.3878e-06
PC 38:4	1.6218	0.0014088
PC 39:6|PC 17:0_22:6	1.5085	0.001697
PC 40:4|PC 18:0_22:4	1.5455	0.00025481
PC 40:6|PC 18:0_22:6	1.5025	0.0020891
PC 40:7|PC 18:1_22:6	1.5125	0.0019852
PC 42:7	1.6585	0.00019547
PC 42:9	1.5895	0.046739
PC O-21:3	1.6573	2.4527e-05
PC O-29:0	2.0559	0.00033084
PC O-30:0	2.2788	5.179e-05
PC O-34:2	1.6345	0.0013949
PC O-36:4	1.7426	1.5425e-06
PC O-36:3	1.6405	0.002149
PC O-36:9	2.4944	2.7393e-05
PC O-39:4	1.6832	0.02072
PC O-40:7	1.5223	0.0010524
PC O-44:5	1.5927	0.0036207
PC O-46:4	1.7263	0.0085198
PC O-46:7	1.6644	0.0057574
PE 34:3|PE 16:0_18:3	2.226	2.2746e-06
PE 36:1|PE 18:0_18:1	0.6289	0.0029506
PE P-34:1|PE P-16:0_18:1	0.64868	0.00502
PE P-36:4|PE P-16:0_20:4	1.7154	3.0831e-06
PE P-36:1|PE P-18:0_18:1	0.48139	0.00028685
PE P-40:5|PE P-18:0_22:5	0.59135	0.0040051
PE P-40:5|PE P-20:0_20:5	0.59312	0.0030515
PI 38:6	1.6554	0.0045792
PI 40:4	1.8908	0.020079
SM 28:1;2O|SM 18;1;2O/10:0	0.35552	0.0033414
SM 30:1;2O|SM 16:1;2O/14:0	2.0387	0.00020749
SM 31:1;2O|SM 17:1;2O/14:0	2.2241	0.00025304
SM 32:1;2O|SM 16:1;2O/16:0	1.8217	1.3776e-05
SM 32:0;2O	1.5209	0.003916
SM 32:1;2O	1.7344	2.3023e-05
SM 32:1;3O	2.3015	0.0022337
SM 34:1;2O|SM 18:1;2O|/16:0	1.5266	1.9157e-05
SM 34:1;2O	1.557	0.0043946
SM 34:7;3O	1.643	0.0028777
SM 35:1;2O|SM 19:1;2O/16:0	1.6968	5.5621e-06
SM 36:0;2O	1.6343	0.00020702
SM 36:1;2O|SM 18:1;2O/18:0	1.5702	8.0993e-05
SM 36:2;2O|SM 18:2;2O/18:0	1.5245	0.00019786
SM 37:2;2O|SM 18:1;2O/19:1	1.7079	8.5511e-05
SM 37:2;3O	0.14968	0.0014005
SM 37:6;2O	2.7366	0.0016006
SM 38:2;2O	2.118	0.0024881
SM 39:1;2O|SM 17:1;2O/22:0	1.6275	0.00053646
SM 39:2;2O|SM 18:2;2O/21:0	1.7823	0.00069777
SM 40:3;2O|SM 18:0;2O/22:3	1.8391	2.6659e-06
SM 40:4;2O|SM 18:1;2O/22:3	2.5865	0.0023389
SM 41:1;2O|SM 18:1;2O/23:0	1.5395	0.00062647
SM 41:2;2O|SM 17:1;2O/24:1	1.6089	9.1062e-05
SM 41:2;3O	2.0751	0.020543
SM 42:4;2O	1.989	0.003878
SM 42:4;2O|SM 18:2;2O/24:2	1.7159	9.2538e-05
SM 42:5;2O|SM 18:1;2O/24:4	1.6958	0.017358
SM 43:2;3O	1.9416	0.0079436
SM 44:2;3O	1.9514	0.00014917
TG 44:1|TG 10:0_16:0_18:1	0.46018	0.0096901
TG 44:2|TG 10:0_16:1_18:1	0.33276	0.00060455
TG 46:0|TG 12:0_16:0_18:0	0.58992	0.010693
TG 46:2|TG 12:0_16:1_18:1	0.44232	0.00052885
TG 46:3|TG 10:0_18:1_18:2	0.30813	0.00011041
TG 48:3|TG 14:0_16:1_18:2	0.49406	0.0053963
TG 48:3|TG 14:1_16:1_18:1	0.57332	0.013502
TG 49:3|TG 15:0_16:1_18:2	0.64989	0.00053581
TG 50:5|TG 14:0_18:2_18:3	0.35128	2.1134e-07
TG 50:4|TG 16:0_16:1_18:3	0.56757	0.00020129
TG 50:4|TG 16:1_16:1_18:2	0.3009	3.5899e-05
TG 51:4|TG 16:1_17:1_18:2	0.49454	2.2785e-06
TG 51:5|TG 15:0_18:2_18:3	0.35586	5.0277e-09
TG 51:0|TG 16:0_17:0_18:0	0.45051	7.8933e-05
TG 52:5|TG 16:0_18:2_18:3	0.41816	5.2938e-07
TG 52:6|TG 14:1_18:1_20:4	0.34709	1.6346e-10
TG 52:0|TG 16:0_18:0_18:0	0.5594	3.053e-05
TG 52:4|TG 16:1_18:1_18:2	0.63985	2.6662e-05
TG 53:4|TG 17:1_18:1_18:2	0.58758	4.8909e-06
TG 53:5|TG 17:1_18:2_18:2	0.42516	2.9289e-07
TG 53:0|TG 16:0_18:0_19:0	0.66181	0.002146
TG 54:5|TG 16:0_18:1_20:4	0.65492	1.4631e-07
TG 54:5|TG 18:1_18:2_18:2	0.45949	4.5723e-06
TG 54:6|TG 16:0_18:2_20:4	0.46358	1.0148e-09
TG 54:6|TG 18:1_18:2_18:3	0.27861	5.8031e-06
TG 54:7|TG 16:1_18:2_20:4	0.25081	3.5726e-08
TG 54:0|TG 16:0_18:0_20:0	0.65085	0.0033789
TG 54:1|TG 18:0_18:0_18:1	0.55064	0.00044195
TG 54:4|TG 18:1_18:1_18:2	0.64271	5.8095e-05
TG 54:7|TG 18:2_18:2_18:3	0.15441	3.2333e-05
TG 55:4|TG 18:1_19:1_18:2	0.629	4.0383e-06
TG 55:0|TG 15:0_16:0_24:0	0.6423	0.00058058
TG 55:1|TG 16:0_21:0_18:1	0.66302	0.00058883
TG 55:3|TG 19:0_18:1_18:2	0.5313	0.00031053
TG 55:6|TG 17:0_18:2_20:4	0.56102	0.0015763
TG 56:1|TG 16:0_22:0_18:1	0.37164	2.7884e-06
TG 56:2|TG 18:0_18:1_20:1	0.51295	4.2846e-07
TG 56:7|TG 18:1_18:2_20:4	0.49255	9.7884e-06
TG 56:3|TG 18:1_18:1_20:1	0.66151	0.00064982
TG 56:7|TG 16:0_18:1_22:6	0.59466	2.6526e-05
TG 56:8|TG 16:0_18:2_22:6	0.57193	0.00042528
TG 57:1|TG 16:0_23:0_18:1	0.60366	1.8889e-05
TG 57:8|TG 17:1_18:1_22:6	0.47213	4.0886e-05
TG 58:1|TG 18:0_22:0_18:1	0.34632	5.9757e-06
TG 58:2|TG 16:0_18:1_24:1	0.23542	2.2364e-06
TG 58:0|TG 16:0_18:0_24:0	0.50961	0.00015186
TG 58:10|TG 16:0_20:4_22:6	0.44838	0.00010262
TG 58:3|TG 22:0_18:1_18:2	0.48498	0.00052679
TG 58:9|TG 18:1_18:2_22:6	0.53687	2.6985e-05
TG 59:2|TG 23:0_18:1_18:1	0.39949	1.6567e-07
TG 59:4|TG 23:0_18:2_18:2	0.35601	0.00015637
TG 60:1|TG 18:0_24:0_18:1	0.34871	8.7495e-06
TG 60:2|TG 24:0_18:1_18:1	0.24921	5.1646e-06
TG 60:4|TG 18:1_24:1_18:2	0.22799	5.9304e-07
TG 60:11|TG 18:1_20:4_22:6	0.52304	0.013219
TG 60:7|TG 18:1_18:2_24:4	0.62029	0.00027524

[truncated: 1 more sheets: mod COVID-19 vs ICU COVID-19_ -]
