# Supplementary material for: Large-Scale Plasma Analysis Revealed New Mechanisms and Molecules Associated with the Host Response to SARS-CoV-2
Source: Int J Mol Sci. 2020 Nov 16;21(22):8623. doi: 10.3390/ijms21228623 (PMC7696386; doi:10.3390/ijms21228623)
Supplement: Supplementary file 1 [file ijms-21-08623-s001.zip › table S2.xlsx]

## Sheet: Foglio1
RSDs of internal standards in QC samples of lipidomics analysis
	Positive mode	Negative mode
Internal standard	RSDs	RSDs
CUDA	12.89	11.84
Cholesterol (d7)	12.84	-
LPC 18:1 (d7)	19.37	12.22
LPE 18:1 (d7)	12.60	13.90
PC 15:0-18:1 (d7)	24.61	17.85
PE 15:0-18:1 (d7)	18.74	15.30
PG 15:0-18:1 (d7)	-	18.77
PI 15:0-18:1 (d7)	-	22.09
SM d18:1-18:1 (d9)	19.92	15.30
TAG 15:0-18:1(d7)-15:0	29.12	-
