# Supplementary material for: Large-Scale Plasma Analysis Revealed New Mechanisms and Molecules Associated with the Host Response to SARS-CoV-2
Source: Int J Mol Sci. 2020 Nov 16;21(22):8623. doi: 10.3390/ijms21228623 (PMC7696386; doi:10.3390/ijms21228623)
Supplement: Supplementary file 1 [file ijms-21-08623-s001.zip › table S3.xlsx]

## Sheet: Legend
	Identified molecules	=	Identified molecules
	Quantified molecules	=	Relative abundance of molecules in each sample
	Modulated COVID-19 vs Healthy	=	modulated molecules for COVID-19 vs HEALTHY comparison
	Modulated ICU COVID-19 vs Healthy	=	modulated molecules for ICU COVID-19 vs HEALTHY comparison
	Modulated COVID-10 vs ICU COVID-19	=	modulated molecules for COVID-19 vs ICU COVID-19 comparison
	Molecules were considered modulated with a fold change > 1.3 and p-value < 0.05

## Sheet: Identified molecules 
Identified molecules with associated m/z, retention time (tr) and retention index (RI)
Analyte	m/z	tr	RI
(9H-fluoren-9-yl)methanol, O-methoxycarbonyl-	165.07	1379.93	1931.3
(R*,S*)-2,3-Dihydroxybutanoic acid, tris(trimethylsilyl) deriv.	292.13	847.965	1371
(Z)-Docos-9-enenitrile	136.11	1651.91	2356.2
1-(2,5-Dimethoxyphenyl)-1-[(trimethylsilyl)oxy]propan-2-amine	209.04	1267.94	1770
1,2-Benzenedicarboxylic acid, bis(2-methylpropyl) ester	57.06	1343.93	1876.5
1,2-Cyclohexanedicarboxylic acid, 2-methylpent-3-yl nonyl ester	127.14	1723.91	2468.7
1,2-Cyclohexanedicarboxylic acid, nonyl 4-octyl ester	281.19	1723.91	2468.7
1,2-Ethenediol, 2TMS derivative	204.1	351.996	1000
1,4-Benzenedicarboxylic acid, dimethyl ester	194.06	1015.95	1503.6
1,5-Anhydroglucitol, 4TMS derivative	217.09	1347.93	1882.4
10-Heptadecenoic acid, (Z)-, TMS derivative	145.07	1495.92	2112.5
11-Octadecenoic acid, (E)-, TMS derivative	339.27	1507.92	2131.2
13-Docosenamide, (Z)-	72.04	1739.91	2493.7
1-Decanol, 2-hexyl-	57.07	655.977	1225.7
1-Deoxypentitol, 4TMS derivative	117.07	1079.95	1560.7
1-Hexadecanol, TMS derivative	103.05	1399.93	1962.5
1-Hydroxy-3-(octanoyloxy)propan-2-yl decanoate	155.14	1879.9	2712.5
1-Methyl-N,N-bis(trimethylsilyl)-4-[(trimethylsilyl)oxy]-1H-imidazol-2-amine	115.09	1087.95	1567.9
1-Monooleoylglycerol, 2TMS derivative	397.31	1731.91	2481.2
1-Monopalmitin, 2TMS derivative	103.05	1679.91	2400
1-Nonene, 4,6,8-trimethyl-	111.12	515.986	1123.5
1-Octanol, 2,2-dimethyl-	85.09	487.988	1102.9
1-Octanol, 2-butyl-	69.07	659.977	1228.6
1-Phenyl-1,2-ethanediol, 2TMS derivative	147.06	935.959	1440.6
2,2'-Bipyridine	128.05	943.959	1446.9
2,3,4-Trihydroxybutyric acid tetrakis(trimethylsilyl) deriv., (, (R*,R*)-)	205.1	1107.95	1585.7
2,3-Butanediol, 2TMS derivative	131.08	727.972	1277.1
2,4-Di-tert-butylphenol	191.17	1051.95	1535.7
2,5-Cyclohexadiene-1,4-dione, 2,6-bis(1,1-dimethylethyl)-	220.14	979.957	1475
2,5-Dimethoxymandelic acid, di-TMS	209.11	1427.93	2006.2
2,5-Dimethoxyphenol, TMS	196.06	943.959	1446.9
2,5-di-tert-Butyl-1,4-benzoquinone	177.11	1443.93	2031.2
2-Allyl-1,4-dimethoxybenzene	135.08	1007.95	1496.9
2-Aminomalonic acid, N,O,O,-TMS	320.11	991.956	1484.4
2-Butenedioic acid, (E)-, 2TMS derivative	147.06	827.966	1354.8
2-Dodecene, (Z)-	83.08	463.99	1084.8
2-Ethyl-1-dodecanol	57.07	659.977	1231.4
2-Ethyl-3-hydroxypropionic acid, di-TMS	247.12	675.976	1240
2-Hydroxy-3-methylbutyric acid, 2TMS derivative	147.06	587.981	1176.5
2-Hydroxy-4-methoxybenzaldehyde, TMS derivative	166.05	1159.95	1640.9
2-Hydroxybutyric acid, 2TMS derivative	131.08	535.985	1138.2
2-Isopropyl-5-methyl-1-heptanol	111.11	779.97	1316.1
2-Monostearin, 2TMS derivative	129.08	1727.91	2481.2
2-Palmitoylglycerol, 2TMS derivative	313.25	1671.91	2387.5
2-Propenoic acid, 2-methyl-, 3,3,5-trimethylcyclohexyl ester	124.12	735.972	1282.9
2-Pyridinecarboxylic acid	52.03	743.971	1288.6
2-Pyrrolidinone, 5-(cyclohexylmethyl)-	41.03	1059.95	1542.9
2-Undecen-4-ol	127.14	787.968	1322.6
3,4-Dimethoxymandelic acid, di-TMS	73.04	1415.93	1987.5
3,5-di-tert-Butyl-4-hydroxyacetophenone	233.15	1311.93	1829.4
3-Cyano-5,5-dimethoxycarbonyl-N-methylisoxazolidine	169.19	1043.95	1528.6
3-Hydroxybutyric acid, 2TMS derivative	233.11	579.982	1170.6
3-Hydroxyisovaleric acid, 2TMS derivative	131.08	647.977	1220
3-Pyridinol, TMS derivative	152.06	547.984	1144.1
4-Hydroxybenzaldehyde, TMS derivative	194.07	855.965	1377.4
4-Hydroxybenzeneacetic acid, 2TMS derivative	252.13	1167.94	1650
4-Hydroxybutanoic acid, 2TMS derivative	233.1	679.976	1242.9
4-Methylcyclohexylamine	113.09	339.998	990.9
6,8-Dioxapentadecane	71.05	1031.95	1517.9
7,9-Di-tert-butyl-1-oxaspiro(4,5)deca-6,9-diene-2,8-dione	175.11	1379.93	1931.3
8-Methylnonanoic acid, trimethylsilyl ester	145.06	963.957	1462.5
9-Octadecenamide, (Z)-	59.03	1675.91	2393.7
9-Octadecenoic acid, (E)-, TMS derivative	129.04	1543.92	2187.5
Acetamide, N-ethyl-	72.04	300	960.6
Acetamide, TMS derivative	75.1	308	966.7
Acetic anhydride	43.01	351.996	1000
Alanine, N-methyl-N-methoxycarbonyl-, undecyl ester	116.1	1295.94	1805.9
alpha-D-(-)-Ribopyranose, 4TMS derivative	204.1	1159.95	1640.9
alpha-D-(+)-Talopyranose, 5TMS derivative	204.25	1375.93	1925
alpha-D-Mannopyranose, 5TMS derivative	191.11	1371.93	1925
alpha-Tocopherol, TMS derivative	502.42	1895.9	2737.4
Arabinitol, 5TMS derivative	307.16	1255.94	1755
Arabinose, 4TMS derivative	204.1	1191.94	1677.3
Arachidic acid, TMS derivative	145.07	1631.91	2325
Arachidonic acid, TMS derivative	129.04	1611.92	2293.7
Azetidine, 1-acetyl-2-methyl-	71.06	331.998	984.8
Benzaldehyde, 2,5-dimethoxy-	151.04	967.957	1465.6
Benzene, (1-butylheptyl)-	105.07	1155.95	1636.4
Benzene, (1-methyldecyl)-	91.05	1215.94	1705
Benzene, (1-methyldodecyl)-	91.05	1367.93	1912.5
Benzene, 1,4-dimethoxy-	138.06	579.982	1170.6
Benzene, 3-cyclohexen-1-yl-	158.1	807.967	1338.7
Benzene, decyl-	218.2	1191.94	1677.3
Benzenepropanoic acid, 3,5-bis(1,1-dimethylethyl)-4-hydroxy-, methyl ester	292.2	1391.93	1950
Benzoic Acid, TMS derivative	135.06	691.975	1251.4
Benzophenone	182.07	1155.95	1636.4
Benzothiazole	108	667.976	1234.3
Benzyl alcohol, TMS derivative	165.07	563.983	1158.8
beta-D-(+)-Talopyranose, 5TMS derivative	191.08	1339.93	1870.6
beta-D-(+)-Xylopyranose, 4TMS derivative	204.1	1211.94	1700
beta-D-Allopyranose, 5TMS derivative	116.89	1375.93	1925
beta-D-Galactofuranose, 1,2,3,5,6-pentakis-O-(trimethylsilyl)-	319.27	1343.93	1876.5
beta-D-Glucopyranose, 5TMS derivative	204.22	1431.93	2012.5
Biphenyl	76.02	867.964	1387.1
Bisphenol A monomethyl ether, TMS derivative	314.09	1411.93	1981.2
Boric acid, 3TMS derivative	263.11	339.998	990.9
Butanedioic acid, 2TMS derivative	147.06	783.969	1319.4
Butanoic acid, 3,4-bis[(trimethylsilyl)oxy]-, trimethylsilyl ester	233.1	947.958	1450
Caffeine	109.06	1335.93	1864.7
Caprolactam	85.05	695.975	1254.3
Carbitol, TMS derivative	103.05	815.967	1345.2
Cholesterol	213.14	1899.9	2743.7
Cholesterol, TMS derivative	159.12	1907.9	2756.2
cis-4,5-Dihydroxy-o-dithiane, 2O-TMS	116.06	1119.95	1596.4
Citric acid, 4TMS derivative	375.11	1315.93	1835.3
Crotonic acid, TBDMS derivative	99.05	319.999	975.8
Cycloheptane, bromo-	97.1	1251.94	1750
Cyclohexane, undecyl-	55.04	1263.94	1765
D-(-)-Citramalic acid, 3TMS derivative	147.09	995.958	1484.4
D-(-)-Erythrose, tris(trimethylsilyl) ether, trimethylsilyloxime (isomer 1)	205.1	1287.94	1795
D-(-)-Fructofuranose, pentakis(trimethylsilyl) ether (isomer 1)	437.2	1315.93	1835.3
D-(-)-Lactic acid, trimethylsilyl ether	117.06	455.99	1078.8
D-(-)-Ribofuranose, tetrakis(trimethylsilyl) ether (isomer 2)	147.07	1215.94	1705
D-(-)-Tagatofuranose, pentakis(trimethylsilyl) ether (isomer 2)	147.06	1323.93	1847.1
D-(+)-Arabitol, 5TMS derivative	103.05	1255.94	1755
D-(+)-Galactopyranose, 5TMS derivative (isomer 2)	204.28	1375.93	1925
D-(+)-Ribono-1,4-lactone (R,S,R)-, 3TMS derivative	147.06	1115.95	1592.9
D-(+)-Talofuranose, pentakis(trimethylsilyl) ether (isomer 2)	147.07	1415.93	1987.5
D-Allofuranose, pentakis(trimethylsilyl) ether	191.09	1335.93	1864.7
D-Arabinopyranose, 4TMS derivative (isomer 2)	204.1	1159.95	1640.9
Decane, 2,3,5,8-tetramethyl-	85.1	671.976	1237.1
Decane, 2,4,6-trimethyl-	85.1	555.984	1152.9
Decane, 3,7-dimethyl-	85.1	703.974	1260
Decane, 5,6-dimethyl-	84.09	535.985	1138.2
Decanoic acid, TMS derivative	117.03	963.957	1462.5
D-Glucose, 5TMS derivative	191.09	1435.93	2018.7
Diethylene glycol, 2TMS derivative	103.05	691.975	1251.4
Diglycerol, 4TMS derivative	205.11	1283.94	1790
Diisoamyl ether	55.04	327.998	981.8
Diphenyl ether	141.07	895.962	1409.4
DL-Phenylalanine, TMS derivative	146.06	1075.95	1557.1
dl-α-Tocopherol	430.39	1891.9	2731.2
D-Mannose, 5TMS derivative	191.09	1371.93	1918.8
Dodecanamide	72.04	1683.91	2406.2
Dodecane	85.09	623.98	1202.9
Dodecane, 2,6,11-trimethyl-	85.1	711.974	1265.7
Dodecane, 2,7,10-trimethyl-	85.03	731.972	1280
Dodecane, 4,6-dimethyl-	101.04	747.971	1291.4
Dodecanoic acid, 1-methylethyl ester	183.17	1147.95	1627.3
Dodecanoic acid, TMS derivative	257.19	1171.94	1654.5
Dopamine, N,N-dimethyl-, dimethyl ether	58.06	1015.95	1503.6
Erythrono-1,4-lactone, (E)-, 2TMS derivative	73.04	867.964	1387.1
Fluconazole	127.04	1519.92	2150
Fluconazole, trimethylsilyl ether	126.05	1591.92	2262.5
Fluoranthene	101.04	1507.92	2131.2
Formamide, N,N-diethyl-	86.04	323.999	978.8
Galactopyranose, 5TMS derivative	191.08	1375.93	1925
Glucopyranose, 5TMS derivative	191.09	1427.93	2006.2
Glycerol monostearate, 2TMS derivative	129.07	1739.91	2493.7
Glycerol, 3TMS derivative	205.1	739.972	1285.7
Hentriacontane	85.1	1927.9	2787.4
Heptacosane	85.1	1755.91	2518.7
Heptadecane	85.12	1211.94	1700
Heptadecane, 2,6-dimethyl-	71.04	1287.94	1795
Heptadecanoic acid, TMS derivative	132.06	1507.92	2131.2
Heptane, 2,2,4,6,6-pentamethyl-	56.05	367.995	1012.1
Heptanoic acid, TMS derivative	117.03	583.982	1173.5
Hexadecanamide	72.04	1527.92	2162.5
Hexadecane	71.07	1119.95	1600
Hexadecane, 2,6,10,14-tetramethyl-	85.09	1311.93	1829.4
Hexadecane, 2-methyl-	85.1	1179.94	1663.6
Hexadecanoic acid, 4-[(trimethylsilyl)oxy]butyl ester	131.05	1671.91	2387.5
Hexanedioic acid, 2TMS derivative	172.09	1027.95	1514.3
Itaconic acid, 2TMS derivative	229.08	823.966	1351.6
L-(+)-Lactic acid, trimethylsilyl ether	117.13	455.99	1078.8
L-5-Oxoproline, , 2TMS derivative	73.04	1047.95	1532.1
Lactic Acid, 2TMS derivative	190.21	451.99	1075.8
L-Alanine, 2TMS derivative	73.04	503.987	1114.7
Levetiracetam	69.03	1095.95	1575
L-Glutamine	56.04	1039.95	1525
L-Isoleucine, TMS derivative	73.04	595.981	1182.4
L-Leucine, TMS derivative	44.04	567.983	1161.8
L-Proline, TMS derivative	75.02	595.981	1182.4
L-Pyroglutamic acid	41.03	1015.95	1503.6
L-Serine, 2TMS derivative	132.08	727.972	1277.1
L-Sorbopyranose, (1S,2R,3S)-, 5TMS derivative	437.25	1327.93	1841.2
L-Threitol, 4TMS derivative	217.11	1039.95	1525
L-Threonine, 2TMS derivative	130.07	763.971	1303.2
L-Valine, 2TMS derivative	144.11	655.977	1225.7
Malic acid, 3TMS derivative	233.1	1015.95	1503.6
m-Cresol, TMS derivative	180.11	559.984	1155.9
meso-Erythritol, 4TMS derivative	217.11	1039.95	1525
Methyl galactoside (1R,2R,3S,4S,5R)-, 4TMS derivative	217.09	1371.93	1918.8
Methyl α-D-glucofuranoside, 4TMS derivative	217.28	1343.93	1876.5
Myristic acid, TMS derivative	132.05	1327.93	1852.9
N,N-Diethyl(trimethylsilyl)carbamate	130.11	439.991	1066.7
n-Hexadecanoic acid	85.09	1399.93	1962.5
Nonadecane	85.09	1359.93	1900
Nonane, 2,6-dimethyl-	71.08	387.995	1027.3
Nonanoic acid, TMS derivative	117.03	839.966	1364.5
o-Anisic acid, tridec-2-ynyl ester	135.09	1679.91	2400
Octadecane	85.07	1291.94	1800
Octadecanoic acid	129.09	1519.92	2150
Octan-2-yl palmitate	239.22	1655.91	2362.5
Octane, 2,3,6,7-tetramethyl-	71.08	435.991	1063.6
Octane, 2,4,6-trimethyl-	71.08	347.997	997
Octane, 6-ethyl-2-methyl-	85.09	491.988	1105.9
Octanoic acid, TMS derivative	201.13	715.974	1268.6
Oleic Acid, (Z)-, TMS derivative	129.04	1507.92	2131.2
Oxalic acid, 2TMS derivative	147.07	543.985	1144.1
Oxalic acid, heptyl propyl ester	57.06	1387.93	1943.8
Palmitic Acid, TMS derivative	117.02	1455.93	2050
Pentacosane	99.11	1703.91	2437.5
Pentadecane	57.07	1011.95	1500
Pentadecane, 2,6,10-trimethyl-	99.11	1171.94	1654.5
Pentadecane, 2-methyl-	127.15	1083.95	1564.3
Pentadecanoic acid, TMS derivative	132.06	1391.93	1950
Phenylalanine	120.07	1075.95	1557.1
Propanedioic acid, 2TMS derivative	73.04	639.978	1214.3
Propylene glycol, 2TMS derivative	147.06	375.995	1018.2
p-Toluic acid, TMS derivative	119.06	843.965	1367.7
Pyroglutamic acid, TMS derivative	75.02	1039.95	1525
Ribitol, 5TMS derivative	205.11	1403.93	1968.7
Ribonic acid, 2,3,4,5-tetrakis-O-(trimethylsilyl)-, trimethylsilyl ester	103.05	1299.94	1811.8
Stearic acid, TMS derivative	132.05	1559.92	2212.5
Supraene	81.07	1755.91	2518.7
Tetradecane	85.09	887.962	1403.1
Tetradecane, 4-methyl-	85.09	959.957	1459.4
Tetrahydrogeranyl formate	83.08	471.989	1090.9
trans-13-Octadecenoic acid	69.06	1507.92	2131.2
Tridecane	57.06	759.971	1300
Tridecanoic acid, TMS derivative	271.28	1255.94	1755
Triethanolamine, 3TMS derivative	262.17	1159.95	1640.9
Triethylene glycol, 2TMS derivative	73.04	1027.95	1514.3
Trimethylolpropane, 3TMS derivative	170.11	903.962	1415.6
Tripropylene glycol monomethyl ether, TMS derivative	131.08	727.972	1277.1
Trisaminol, 3-OTMS	103.05	919.961	1428.1
Tyrosine, 2TMS derivative	208.11	1359.93	1900
Undecane	85.09	491.988	1105.9
Undecane, 3,7-dimethyl-	85.1	715.974	1268.6
Undecane, 4-methyl-	85.09	511.986	1120.6
Urea, 2TMS derivative	189.09	683.976	1245.7
Valproic acid, TMS	174.12	563.983	1161.8
Xylitol, 5TMS derivative	319.16	1243.94	1740
Histidine	329	1092	1567
Hypoxanthine	280	1308	1833.4
Purine	441	1512	2155.7
Citramalic acid	247	996	1472.7
Phenylalanine, di-TMS	120	1156	1637.8
Ephedrine	130	1340	1879.5
Ethanolamine	405	1016	1491.3
Glycine	114	316	961
Isonicotinic acid	180	724	1295.9
Glutamic acid	174	1060	1534
Glutamine	84	1016	1491.3
Proline	288	1116	1592.8
Tryptophan	202	1552	2226.1
Malic acid	307	1016	1491.3
Metanephrine	298	1276	1789
N-Acetyl-L-Alanine	188	716	1260.6
N-Isobutyrylglycine	99	568	1164.7

## Sheet: Quantified molecules
Relative abundance of molecules in each sample (normalized)
	4A	9A	12A	13A	14A	20A	24A	26A	27A	31A	34A	36A	38A	39A	40A	41A	43A	42A	44A	46A	47A	48B	56A	61A	63A	64A	66A	67A	68A	69A	70A	71A	72A	74A	78A	79A	83A	18A	1A	45A	62A	84A	IRA POS	CM POS	CE A	SG POS	80A	82A	89A
	COVID-19	COVID-19	COVID-19	COVID-19	COVID-19	COVID-19	COVID-19	COVID-19	COVID-19	COVID-19	COVID-19	COVID-19	COVID-19	COVID-19	COVID-19	COVID-19	COVID-19	COVID-19	COVID-19	COVID-19	COVID-19	COVID-19	COVID-19	COVID-19	COVID-19	COVID-19	COVID-19	COVID-19	COVID-19	COVID-19	COVID-19	COVID-19	COVID-19	COVID-19	COVID-19	COVID-19	COVID-19	COVID-19	COVID-19	COVID-19	COVID-19	COVID-19	COVID-19	COVID-19	COVID-19	COVID-19	COVID-19	COVID-19	COVID-19
(9H-fluoren-9-yl)methanol, O-methoxycarbonyl-	0.883964	0.903879	0.832027	0.651488	0.880122	0.949309	0.961779	0.951073	1.00653	0.950109	0.620018	0.883654	0.872582	0.983224	0.970229	0.898727	0.947276	0.906671	0.657667	0.922788	0.895934	1.54097	0.897271	0.899447	1.00045	1.47148	1.64345	1.10247	1.05924	1.07943	0.97714	1.03219	1.08227	1.11354	1.03415	1.09764	1.01513	1.36801	1.1371	1.66497	1.8114	1.99488	2.03668	1.63874	1.4626	0.634392	0.826967	1.06088	1.13917
(R*,S*)-2,3-Dihydroxybutanoic acid, tris(trimethylsilyl) deriv.	1.33216	2.17209	2.89225	11.4189	0.778976	5.71711	5.01729	4.24687	5.725	8.89904	2.44751	4.42641	8.78416	3.38417	2.81414	7.84877	1.46873	0.877946	3.44086	3.22893	5.61209	6.92132	6.3209	3.775	2.8437	1.98996	25.2853	6.07214	0.575442	3.06369	4.61741	3.09096	2.36742	4.32556	2.23738	2.15474	3.76637	6.43797	1.92315	4.88422	4.97625	6.05229	26.0446	3.23349	3.94204	0.353099	0.491457	1.9635	7.96903
(Z)-Docos-9-enenitrile	0.351471	1.24311	1.15147	2.37433	1.77394	0.876165	0.613016	0.69873	1.0099	1.50438	0.751064	0.811336	0.348048	0.898561	0.995546	0.642911	0.779006	0.852728	1.01607	0.854745	1.2648	3.25961	1.35614	1.31786	1.34574	1.25437	1.44479	1.75766	0.972511	1.20182	1.2513	1.52826	1.54031	1.44573	1.58416	1.22426	1.53588	1.24083	1.37615	1.51206	1.31568	1.825	2.01988	2.59575	1.21969	1.12049	0.798748	1.11284	1.18899
1-(2,5-Dimethoxyphenyl)-1-[(trimethylsilyl)oxy]propan-2-amine	0	0.474183	0.608532	0.0400553	0.961688	0.0140157	0.734244	2.34996	2.75257	2.52146	0.540471	2.69478	0.0176184	0.704136	0.0210986	0.576274	0.310946	2.50768	2.86602	0.41654	0.802597	0	0	0.423726	0.456122	0	0	0	0	0.478851	0.438614	0.455993	0.456073	0.437144	0.453793	0.446186	0.0239997	4.28265	0.422232	0.0333019	0.222975	0	0	0	0	0.760266	0	0	1.40711
1,2-Benzenedicarboxylic acid, bis(2-methylpropyl) ester	0.280122	0.331635	0.411522	0.440903	0.376916	0.399175	0.378417	0.355047	0.474778	0.444392	0.248291	0.278271	0.28612	0.26025	0.234882	0.312073	0.247549	0.348685	0.405159	0.3607	0.303968	0.366569	0.415032	0.390955	0.349921	0.168824	0.405624	0.5351	0.239684	0.315266	0.27468	0.387399	0.31872	0.366788	0.39231	0.380615	0.410859	0.359364	0.415875	0.412035	0.551296	0.677065	1.03274	0.587768	0.631532	0.146635	0	0.303346	0.476792
1,2-Cyclohexanedicarboxylic acid, 2-methylpent-3-yl nonyl ester	0.850463	1.23054	0.688556	2.97385	0.944356	0.628929	0.881518	0.480252	0.567992	1.72906	0.54849	0.561444	0.545043	0.543495	0.986125	0.495032	0.821738	0.443978	0.500235	0.962196	0.936199	1.12965	1.58709	0.470018	0.872525	0.645528	1.13199	0.712936	0.64667	1.13161	0.646371	1.09781	0.861114	1.11295	0.910505	0.717565	1.09527	1.09554	1.03047	0.721246	0.717722	0.722997	0.719019	0.626914	0.500444	0.502552	0.334374	0.552555	0.634379
1,2-Cyclohexanedicarboxylic acid, nonyl 4-octyl ester	1.33185	0	0.618605	0.407457	0	0	0	0	0	0.361724	0.441341	0.696613	0.797461	0.568828	0.773561	0	0.453716	0.874951	0.751618	0	0	0.811529	0.662379	0.444263	0.864535	0	0.29749	0.231183	0.158498	1.3533	0.0680845	0.815811	0.35285	0.53748	0	0	0.360374	1.67419	0.66965	0	0.318719	0.090579	0	0	0.296761	0.297219	0	0	0
1,2-Ethenediol, 2TMS derivative	1.20093	1.75007	0.717614	2.99384	1.38463	2.41809	1.97292	0.889706	2.14839	3.43986	0.546593	0.833868	0.536924	0.813354	1.15242	0.56205	0.671549	0.375869	0.822167	0.977174	0.750517	0.941611	1.02383	0.742513	1.39278	0.905729	1.20421	1.12409	1.53464	0.806648	0.602185	1.00249	1.74152	1.0521	1.15008	0.902762	0.879589	2.14513	1.81832	0.40509	0.272105	0.233606	0.276532	0.256018	0.0623491	0.251155	0	0.0676208	0.116614
1,4-Benzenedicarboxylic acid, dimethyl ester	1.70459	0.832466	2.34775	2.02672	2.32522	2.72024	3.60306	1.62691	2.72916	1.81657	1.41493	3.7729	3.54309	2.79856	1.82603	1.58565	2.323	2.28236	2.80338	0.105102	2.53806	1.53167	0.477257	0.374403	0.148344	0.0914746	0.193358	0.10957	0.111282	0.12126	0.425214	0.0907141	0.728996	0.344287	0.610372	0.503245	0.572681	0.185273	0.0900409	0.200326	0.098276	0.1009	0.216052	0.0782368	0	0	0	0	0
1,5-Anhydroglucitol, 4TMS derivative	0.892307	1.01104	1.08022	1.39486	1.12568	1.06333	1.03581	1.06058	1.38895	1.72432	1.11892	1.17183	1.33202	1.02555	1.05118	1.14256	0.99995	0.983618	1.07746	1.06723	0.979754	0.651625	1.0608	0.889116	1.03331	1.37709	0.783272	1.41759	1.47012	1.38172	1.06218	1.07991	0.926055	0.901666	1.0445	0.957391	1.17869	1.31716	1.44489	1.32402	1.41229	1.51917	1.38965	1.34586	0.898371	0.66785	0.509665	0.579288	1.26531
10-Heptadecenoic acid, (Z)-, TMS derivative	5.18917	2.21905	10.4666	12.7867	8.25769	7.58673	9.15463	6.44088	7.70983	10.5	10.4204	1.39328	5.24864	1.89968	4.75825	6.56935	3.69638	2.35144	2.49285	2.21907	3.1765	0	8.20233	2.29516	2.52727	0	0	4.17474	3.38192	2.55181	1.92595	2.0148	2.37357	3.29606	3.02103	2.11719	3.6758	1.73148	1.41128	2.17577	0	0	0	0	0	0.768676	0.761175	0	1.22606
11-Octadecenoic acid, (E)-, TMS derivative	1.1e+20	1.72e+18	1.24e+20	0	0	4.19e+18	3.29e+18	8.02e+17	4.88e+18	1.11e+19	9.48e+18	0	4.69e+16	8.34e+17	2.08e+16	1.36e+16	0	0	8.67e+17	0	6310000000000000	2.63e+18	1.31e+18	2.64e+16	1.99e+16	6.73e+17	1.27e+17	1.48e+17	0	0	1200000000000000	485000000000000	168000000000000	0	0	1410000000000000	1370000000000000	0	0	2070000000000	896000000000	666000000000	2.74781e+08	1.5273e+08	4.20313e+06	0	3.94069e+06	9.56265e+06	2.19994e+06
13-Docosenamide, (Z)-	0.872784	1.16348	0.902073	0.793319	1.08468	0.87021	0.817801	1.06162	0.454337	0.820959	0.735168	0.844402	0.455595	0.633937	0.801182	0.407886	0.625271	0.999345	0.972787	0.588804	1.61732	0.902374	1.17183	1.2826	0.6085	0.627746	0.6219	0.671179	0.494405	1.1473	1.02075	1.0365	0.784534	0.779288	1.1587	0.921659	0.924676	0.355831	0.567879	0.597468	0.511441	0.577737	0.572441	0.649483	0.454792	0.319234	0.418271	0.378188	0.562425
1-Decanol, 2-hexyl-	0.487456	0.00942082	0.447498	1.55965	1.10225	0.494977	1.18161	0.530013	0.521926	0.547822	0.49455	0.00435626	0.512413	0.00767866	0.484573	0.528661	0.496827	1.18042	0.943507	0.491688	0.534632	0.518947	0.705805	0.457669	0.496815	0.498897	1.33097	1.1162	1.23988	1.87131	0.00573815	0	0.559836	0.573359	0.621357	0.0173594	1.3199	0.675169	1.40069	0.606071	0.746272	0.669869	0.37328	0.0797227	0.00952703	0.715924	0.259529	0.239669	0.296756
1-Deoxypentitol, 4TMS derivative	4.11137	4.49838	0.139365	0.319006	7.25084	5.03552	12.2454	0.18248	9.93578	10.9536	2.40396	3.05419	4.20358	5.67697	2.43946	3.06129	3.93846	2.47974	0	0	4.79518	0.618357	4.56452	3.077	0	4.68978	8.38761	5.6763	5.38359	2.28442	1.36225	2.48704	0	0	2.52371	4.95962	3.09697	2.81197	0	2.27647	0.0479918	2.14109	4.308	0.918035	2.90838	0	0	0	1.70144
1-Hexadecanol, TMS derivative	0.859343	1.35747	0.849024	0.930192	0.132838	1.96618	2.33333	1.29529	3.19997	0.472412	0.453769	1.02372	1.02223	1.63163	0.349331	0.576254	0.781956	1.22842	0.821988	1.14432	0.351643	1.63523	2.68881	1.19747	2.21815	0.119043	3.12419	0.209022	1.09307	1.43807	1.53612	1.49081	2.67182	2.40334	1.64606	0.372509	1.55567	0.403574	0.357293	2.11986	0.663617	2.06938	1.68367	3.42489	0	2.03706	1.57848	1.87406	0.123894
1-Hydroxy-3-(octanoyloxy)propan-2-yl decanoate	1.66337	2.34202	4.60024	6.85238	3.29635	3.72752	2.94588	1.4762	3.47759	2.66557	5.5352	3.53665	2.78151	2.68948	0.252705	0.19944	0.448834	2.08332	4.2091	2.41203	2.64901	2.32848	3.50971	3.55617	2.38491	3.15557	0.141681	0.144524	0.93665	4.13265	3.42917	2.59916	2.50429	2.85802	1.93289	1.79746	4.2822	2.10969	2.19351	2.49311	1.69559	2.75635	2.30389	1.79513	3.87526	1.78849	1.73256	1.26013	1.45418
1-Methyl-N,N-bis(trimethylsilyl)-4-[(trimethylsilyl)oxy]-1H-imidazol-2-amine	0.82618	0.766955	1.20945	2.32951	0.792723	1.96413	1.10638	2.19301	4.22073	2.43471	2.29683	0.946365	1.92439	1.35768	2.16612	1.70973	1.40415	1.37923	3.84508	0.770406	2.1693	5.6902	3.0238	0.786096	1.14066	0.950488	0.277554	1.16736	0.627889	1.82588	0.984118	0.72729	0.837168	2.11564	1.71932	0.749682	2.45849	1.70522	2.61636	2.88	1.86987	1.76202	0.81173	2.10365	0.278849	0.567721	0.633793	1.86615	1.48693
1-Monooleoylglycerol, 2TMS derivative	6.57045	5.05066	19.5098	31.3874	2.3741	0.206703	1.90735	1.90875	4.21677	15.7502	6.49444	2.10219	6.37192	1.5402	3.12752	5.13049	5.01218	1.21179	1.9564	4.68432	2.79557	4.29701	37.1708	1.50919	23.1187	0.543498	1.31954	0.591581	1.50671	5.6983	4.05009	7.03998	6.46725	25.6534	13.8086	4.06541	15.5405	14.0865	17.4005	2.53684	1.29378	4.14196	4.65219	1.97904	3.45346	9.06992	1.3723	2.67212	6.77688
1-Monopalmitin, 2TMS derivative	0.444335	0.659399	1.54231	0.968765	0.788672	1.18652	0.79661	0.686397	0.505755	0.981312	0.827769	0.919483	0.914031	0.728958	0.900245	0.702247	1.06927	0.569429	0.590377	1.72173	1.2191	0.716483	2.34622	0.533992	0.803217	0.843896	1.36156	1.26263	0.943146	1.23564	1.07973	1.59739	0.679321	1.01685	0.723213	1.55229	0.743443	0.735427	0.699183	1.19974	0.909812	1.06675	0.369147	1.00403	0.237947	0.923271	0.291537	0.19014	0.774863
1-Nonene, 4,6,8-trimethyl-	0.937759	0.966055	0.948078	1.0041	1.0348	1.03585	0.96649	1.05075	0.934418	1.05202	0.992499	0.941329	1.01148	1.09147	0.942617	1.05421	1.01878	1.00317	1.01663	0.883779	1.14422	1.07758	0.961807	0.932463	0.986685	0.659201	0.934684	0.817421	1.00661	1.00669	1.00629	0.992847	1.02607	1.02792	1.07797	1.01201	1.03854	1.08046	1.14834	1.14137	1.09686	0.934836	0.895756	0.778245	0.177699	0.33834	0.159256	0.170019	0.295546
1-Octanol, 2,2-dimethyl-	1.10824	0.71319	1.29021	1.16948	1.2396	1.13098	1.23578	1.20548	1.51296	1.49648	1.03392	1.15262	1.22879	1.22673	1.2311	1.22219	1.16957	1.4757	1.10744	1.32317	1.10507	1.38581	1.40336	1.13967	1.256	0.807965	0.75967	0.915312	1.20051	1.1685	1.16228	1.41195	1.16278	1.39644	1.08177	1.16003	1.18235	1.69594	1.46909	1.47296	1.5488	1.2007	0.898425	0.721821	0.220022	0.118513	0.200565	0.213093	0.395703
1-Octanol, 2-butyl-	0.878376	0.859639	1.11137	0.724236	1.20198	0.522274	0.70839	0.146237	1.29782	0.838149	1.60823	0.0838402	1.3081	0.0355371	1.36041	1.22194	0.913165	0.591918	0.235594	0.910387	0.78584	1.35204	1.27781	1.15567	0.978992	1.30146	1.00116	0.888679	0.658738	0.757094	1.33897	0.808866	1.27933	1.03189	0.639527	1.25037	0.984758	0.793347	1.56033	0.704967	1.78075	1.13829	1.08454	1.03772	0.473237	0.624724	0.376937	0.56123	0.592253
1-Phenyl-1,2-ethanediol, 2TMS derivative	1.23625	1.48663	2.1576	2.018	3.1491	1.6541	2.24663	1.66894	2.83478	3.09323	1.42903	0.731804	1.25437	2.85412	1.4787	1.3239	1.27484	1.44427	1.79159	2.3621	1.60491	2.70324	1.35254	1.68132	2.64653	0.856316	1.81313	1.47639	1.17928	1.88777	1.41022	2.82501	2.7578	1.86021	1.42295	1.56663	1.77691	2.27032	1.87686	0.921492	0	1.00225	0.977027	2.00256	0.558053	0.509987	0.667278	0.918427	0.257055
2,2'-Bipyridine	0.738047	0.672645	0.825918	0.947976	0.801114	0.796183	0.952309	0.704874	0.96188	0.963301	0.813544	0.618664	0.767955	0.634681	0.853537	0.66336	0.698324	0.743497	0.961386	0.797485	0.785368	1.05424	0.719954	0.697833	1.04758	0.617076	0.775921	0.816952	0.831276	0.793168	1.25408	0.85766	0.843706	0.98314	0.891264	0.917783	0.998036	1.44311	1.1267	1.01755	0.715963	0.8219	1.25817	0.763183	0.259011	0.3992	0.243389	0.379249	0.470805
2,3,4-Trihydroxybutyric acid tetrakis(trimethylsilyl) deriv., (, (R*,R*)-)	0.31945	1.1319	1.20328	1.89576	0.90196	1.79253	1.57184	1.40025	2.16732	1.86993	1.88373	0.93869	2.53075	1.85386	1.09	1.80433	2.03381	1.17542	0.863921	0.357567	0.546658	1.64544	0.618347	0.851837	0.533951	0.47904	0.975331	1.85148	0.476818	0.850681	0.732848	0.904611	1.13397	0.445242	0.400383	0.469042	1.07421	0.932453	1.06709	0.994007	1.55234	1.60638	0.882513	0.419238	0.274177	0.150448	0.219845	0.551292	2.04658
2,3-Butanediol, 2TMS derivative	1.35106	1.05378	1.54193	1.15565	1.63631	1.24427	1.32169	1.21885	1.39663	1.52819	0.679941	0.776193	0.865352	0.831618	0.792774	0.907271	0.73924	1.09829	1.31733	1.42273	1.53749	13.2275	1.64359	1.3372	1.49211	10.5767	1.32823	0.526911	1.15569	3.30586	1.43075	2.20217	1.41876	1.37561	1.67451	1.49808	3.6381	1.10013	0.961801	0.798048	1.15845	4.10386	0.926379	0.853288	0.766868	0.695262	0.7856	0.928938	2.60944
2,4-Di-tert-butylphenol	6.91551	0.611714	4.62287	3.83019	1.5082	0.267351	0.571888	0.303029	0.164891	0.622122	0.739482	1.11998	0.100271	1.31871	0.846477	0.384072	0	0.548234	1.37276	0.765218	1.03642	3.37061	1.90489	0.275428	1.2245	0.948969	1.65686	1.42027	0	2.97299	1.68314	1.30419	0.4394	0	2.79558	0.999638	0	0	0.68879	0.545031	0.402746	0.85392	3.95339	2.79226	0.821134	0.786583	0.589994	0.793695	0.725701
2,5-Cyclohexadiene-1,4-dione, 2,6-bis(1,1-dimethylethyl)-	0.613821	0.754669	0.647555	0.621086	0.813667	0.843555	0.930833	0.875126	0.818088	1.00651	0.791234	0.825638	0.840401	0.846292	0.933825	0.85749	0.811991	0.907861	0.81865	0.896407	0.84528	0.784646	0.407709	0.709457	0.946981	0.777741	0.674259	0.774122	0.727128	0.860388	0.810998	0.973478	0.915219	0.850796	0.744461	0.965924	0.693871	0.749876	0.570058	0.656861	0.784701	0.396751	0.37363	0.368542	0.277095	0.272488	0.373351	0.27573	0.287867
2,5-Dimethoxymandelic acid, di-TMS	1.17291	0.813888	0.565082	0.952584	0.902435	0.653001	0.835764	0.584484	0.792156	0.855312	0.583155	0.473452	0.405866	0.579803	0.772291	0.63421	0.526236	0.772749	0.439033	0.574227	1.32765	1.06348	1.42049	0.5736	0.744729	2.09869	3.9117	1.49203	0.633572	0.733007	0.523949	0.593858	0.721877	0.750166	0.645743	0.592455	0.795146	0.485013	0.825807	1.04375	0.891702	1.05011	0.953964	1.04325	0.804531	0.242674	0.107773	0.347503	0.329227
2,5-Dimethoxyphenol, TMS	0.829907	1.0005	0.685889	1.5291	1.19438	1.16598	1.20502	0.0122679	1.40811	1.81605	0.872844	0.722822	0.793129	0.832169	1.41894	0.800655	0.860909	0.961331	0.770512	1.27282	0.739714	1.03825	0.722115	0.795928	1.50969	1.0703	0.734347	1.10802	1.02437	1.10366	0.898586	1.49903	2.31286	1.57746	1.10947	1.48318	1.38558	2.45454	1.99606	1.41573	1.08054	1.18819	0.939087	0.892794	0.429883	0.661565	0.432187	0.460345	0.81289
2,5-di-tert-Butyl-1,4-benzoquinone	2.46619	2.37245	3.22725	1.36237	0	0	2.37194	0	6.48498	3.32759	2.32038	0	0.705251	2.43787	2.38017	1.04443	2.28251	0	0	3.55325	4.85207	5.67868	8.1101	3.37239	3.84184	7.10946	10.6753	6.75225	3.3636	2.62702	1.7277	3.77568	2.94985	4.2213	3.59973	4.32791	4.00369	6.46728	6.33093	8.40948	9.18197	8.90554	6.31358	3.44293	6.82883	1.93894	3.57724	4.01645	4.51475
2-Allyl-1,4-dimethoxybenzene	0.751486	0.494365	0.53089	3.13979	0.98319	0.595349	0.644744	0.137406	0.654257	1.75277	0.326316	0.458817	0.188416	0.456396	1.03125	0.142577	0.422767	0.129691	0.271034	0.57897	0.251549	1.15858	0.712255	0.182701	0.987185	0.353988	0.358877	0.933362	0.503242	0.727237	0.276185	0.606835	0.992746	1.24705	0.634479	0.260233	0.660642	1.07696	0.740277	0.429951	0.219279	0.295144	0.902412	0.57385	0.261051	0.393488	0.176472	0.183191	0.487386
2-Aminomalonic acid, N,O,O,-TMS	0.00461668	1.14777	0.552161	0.19306	3.0509	2.80157	2.55393	4.73065	1.70134	2.93985	9.54128	2.02624	5.06929	4.0578	5.19281	5.33309	3.16522	4.62876	0.62528	1.86157	1.94243	0.373798	0.00518384	0.936423	2.23424	1.26185	0.339683	3.24461	0.643324	0.637714	2.43648	1.94411	6.56734	0.968714	2.10361	2.95052	0.256357	4.60984	2.90534	7.07003	6.43858	4.55078	0.114764	2.37688	0.304933	0.924798	2.05	3.21294	4.86961
2-Butenedioic acid, (E)-, 2TMS derivative	0.869369	0	1.90987	2.00099	0	0	0	0	0	0	3.45617	0	0	0	0	0	0	0	0	0.756367	0	2.86396	0	0.964415	0.79764	0	0	0	0	0	0	0	0	0	0	1.05787	0	0	3.60911	0	12.5986	0	1.41902	1.98136	2.1156	0.931173	0.884344	1.0494	1.09169
2-Dodecene, (Z)-	1.00531	0.920232	0.953931	0.950861	0.992096	1.08296	1.03947	1.03055	1.03115	1.06473	0.944639	0.997522	1.03829	1.09753	1.0123	1.05248	1.03899	1.06393	1.0417	0.919248	1.11877	1.09168	0.916216	0.843119	0.987069	1.0392	0.885131	0.984152	0.949664	1.01542	0.96893	1.01714	1.06393	1.00637	1.01471	0.973792	0.996085	1.12044	1.04313	1.05836	1.1005	1.07635	0.890354	0.787216	0.207291	0.266494	0.237968	0.216042	0.288401
2-Ethyl-1-dodecanol	0.421349	0.00146727	0.386154	1.341	0.94942	0.425935	1.01576	0.455124	0.447236	0.469298	0.421887	0.0037104	0.435726	0.00335343	1.81048	1.9778	0.419372	0.994367	0.787565	0.412406	1.96958	0.433259	0.587831	0.380214	0.411667	1.85996	1.09064	3.10568	1.00992	1.51954	0.00464492	0	0.450292	0.459679	0.49654	0.00496127	1.04788	0.507781	1.05219	0.454798	0.559452	0.501663	0.00307266	0.00316614	0.00487405	0.585702	0.213329	0.201868	0.261477
2-Ethyl-3-hydroxypropionic acid, di-TMS	3.66755	1.03674	1.57098	3.73987	0.952138	2.50701	3.71826	1.30281	4.23882	2.77494	1.46783	2.08401	1.34409	1.36663	1.83382	1.54273	0.723578	0.937256	1.77724	0.772983	2.26217	1.41481	1.5426	1.35692	0.68576	2.52436	3.05351	4.86079	0.780427	1.05991	1.20248	0.740922	1.33138	0.727711	0.584818	1.58485	4.30677	1.70839	0.628493	1.22208	1.09502	1.19064	2.19756	0.871558	1.12731	0.334892	0.244589	0.233757	0.532636
2-Hydroxy-3-methylbutyric acid, 2TMS derivative	6.22616	1.10379	3.89277	27.3206	4.56061	20.4458	19.8897	2.26163	19.7789	4.0845	1.35061	8.89576	19.5135	3.60643	6.7295	7.40616	1.14049	1.52189	2.5433	2.65345	3.91541	3.50532	1.32788	5.95481	5.03516	15.4403	39.3749	18.546	1.04937	1.89024	4.29743	3.35737	5.53786	1.90429	0.781271	12.5349	3.81245	16.3059	0.886674	2.95029	4.74487	4.42167	21.7689	6.96999	1.42394	0.592502	1.44633	0.46168	15.6064
2-Hydroxy-4-methoxybenzaldehyde, TMS derivative	2.38353	1.46642	1.10703	3.66047	0.773836	0.429005	0	0.556946	3.80819	2.66836	0.670753	0.484289	0.79879	0.674674	1.3885	0.350198	0.343769	0.523542	0	0.703473	0.423264	0	0.443439	0.55236	0.973103	0	0	0	0.303974	0.695631	0.620991	0.372621	0.672101	2.20492	0.242546	0.681072	0.849708	2.92196	0.646815	0	0	0.653717	0	0	0.242976	0	0.16275	0	0.118061
2-Hydroxybutyric acid, 2TMS derivative	5.41704	1.95816	6.24299	5.84905	4.83484	9.52323	5.44609	4.62607	7.84228	4.78452	2.72369	4.21488	3.98723	3.04548	5.77442	5.00713	1.575	1.93931	3.10373	3.12973	4.73164	7.49947	1.28499	2.76117	4.49135	4.39173	4.46651	7.60305	0.916651	4.18693	2.56519	2.26702	3.20579	3.27644	2.66837	3.90053	5.0365	6.66594	3.34323	4.70616	2.98346	3.50206	3.93513	3.61807	0.323187	0.510191	0.272371	0.864032	3.04311
2-Isopropyl-5-methyl-1-heptanol	0.94144	1.00997	0.848168	1.13246	1.27345	1.2629	1.01693	1.03151	1.53789	1.16116	1.00146	0.913119	1.31056	0.834387	0.982674	0.999167	0.85806	0.846056	0.886499	0.766904	0.929545	1.4788	0.995024	1.15411	1.21557	0.898883	0.692795	0.853326	1.00591	1.56625	1.23969	1.23584	1.47623	1.03847	1.32154	1.05534	1.35789	1.15353	1.21866	0.842826	1.37563	1.07151	0.852446	0.583962	0.810616	0.423431	0.455026	0.458252	0.838823
2-Monostearin, 2TMS derivative	1.31788	0.989571	2.52467	4.11966	0.885068	0.76346	1.0892	0.330587	0.917979	2.20769	1.0933	0.664264	0.765874	0.708428	1.73365	0.816311	1.0727	0.446122	0.618125	1.01048	0.973924	0.957086	4.29322	0.549926	3.43809	0.228884	0.28661	0.439586	0.813893	1.28516	1.06458	1.13168	1.21105	3.22019	2.58223	0.952714	1.95633	2.62939	2.74921	0.840897	0.528836	1.14885	1.8598	1.45398	0.451242	1.73349	0.315777	0.425609	1.43561
2-Palmitoylglycerol, 2TMS derivative	0.636702	0.766235	1.593	1.33026	1.4298	0.602942	1.43797	1.35456	0.624723	1.31348	0.935107	1.34207	0.832641	0.745802	0.825439	0.950874	1.50358	0.842271	1.12362	1.35467	1.0374	2.14435	4.89464	0.954401	1.74995	0	0.547508	0.501963	1.71691	1.21911	1.20001	1.60602	2.20642	2.25448	1.27231	2.09097	1.96175	7.05954	2.01045	0.984375	0.894096	1.61683	1.73064	1.73858	1.36115	12.1041	0.965037	1.58604	1.32429
2-Propenoic acid, 2-methyl-, 3,3,5-trimethylcyclohexyl ester	0	0	0	0	0.918656	0	0	0	0	0	0.130438	0	0	0	0	0	0	0	6.76643	1.61657	0	0	0	4.40813	0	0	0	0	18.8189	0	0	8.72144	8.83195	0	8.72687	11.1198	0	0	0	6.81685	6.46712	8.89393	132.642	0	0	0	0	0	0
2-Pyridinecarboxylic acid	0.738261	0.64313	0.785666	1.98489	0.6002	0.753101	0.797076	0.862882	1.32528	1.32833	1.4708	0.588336	2.68607	1.6051	2.04487	2.43545	1.88226	2.33712	2.60063	1.61939	2.26904	2.62019	1.55162	1.33997	1.37826	1.35023	1.39051	1.41879	1.25461	1.20314	1.27574	1.11695	1.04295	1.1902	1.41911	1.11099	1.13286	0.980921	1.00464	1.03766	0.90778	1.8028	0.507403	0.719898	0.810289	0.41793	0.452925	0.70177	0.529858
2-Pyrrolidinone, 5-(cyclohexylmethyl)-	0.449517	0.448978	0.122548	0.0374121	0.969048	1.19793	1.80786	0.415119	0.782067	1.08074	1.13384	1.06156	0.364102	1.51095	1.28858	0.76239	0.926547	1.24665	0.781712	0.0278346	2.12121	1.90394	0.0604871	0.513482	1.43315	1.05513	1.31933	0.826596	0.00394828	0.487639	1.46205	0.730975	0.478874	0.737183	1.60405	0.787427	0.0103722	0.469695	0.565111	0.782196	0.531132	0.912273	0.0151202	2.87687	0.28939	0.117645	0.647218	0	0.0110073
2-Undecen-4-ol	1.06219	0.90715	0.855407	0.903698	0.997134	0.937582	0.957252	0.985891	1.03839	0.887912	0.975921	0.93993	1.17185	0.912104	0.815063	0.900628	0.950802	0.820189	1.01732	0.919181	0.851953	0.98138	0.863383	0.880735	1.13917	0.877689	0.758096	0.935885	0.881585	1.14061	1.1318	1.16782	0.78319	0.98185	0.970151	1.31538	1.05156	0.991084	1.14793	1.06706	1.28463	1.05382	0.769772	0.688415	0.641042	0.595219	0.644954	0.630785	0.930015
3,4-Dimethoxymandelic acid, di-TMS	0.675655	1.74822	0	3.59311	2.02622	3.62061	3.45555	2.83176	3.48033	3.14876	0.232761	2.91999	2.00011	0.310614	3.41614	2.92779	2.65013	1.86747	1.50574	3.29106	2.18399	0	0.715706	3.25686	0.513933	0	0	0.656387	7.00125	2.6785	2.19663	3.41141	2.96128	0	0.68484	2.94108	2.54186	2.69569	0	1.03459	1.23118	0	0	0.842948	0.288737	0.400075	0.531345	0.296741	0.141297
3,5-di-tert-Butyl-4-hydroxyacetophenone	1.18378	0	0.652703	0	3.01803	0	0	0	0	0	0	0.0691372	0	15.1675	0	0	0	0.0811343	0	0	0	4.48179	0	0	0	6.97243	5.67735	8.43216	0	0	0	0	0.141961	0	0	0	0	0	0	8.12126	9.95257	8.11023	4.40657	3.10215	1.88043	0.0464192	0	1.92865	0.770843
3-Cyano-5,5-dimethoxycarbonyl-N-methylisoxazolidine	0.975907	0.523773	0.949699	0.99732	0.907404	0.996038	0.987197	0.989751	0.983504	1.03272	1.01144	1.00661	1.06076	1.08449	1.02848	1.05163	1.02216	0.908018	0.994719	0.867046	1.0579	0.99853	0.963918	0.505887	0.790332	1.08187	0	0.944151	1.00495	1.06087	0.75433	0.765188	1.05406	0.968349	1.03721	0.920274	0.643681	0.984469	0	0.851361	0.864418	1.129	0.401946	0.684527	0.425955	0.206125	0.223682	0.432465	0.284697
3-Hydroxybutyric acid, 2TMS derivative	6.59295	1.1563	4.17004	38.9323	3.86494	31.3782	31.8176	2.46172	23.2953	4.49301	1.3711	9.74695	21.5991	3.71956	7.68177	8.05469	1.33227	1.67062	2.46512	2.94742	4.41726	3.52251	1.53731	6.85716	5.73105	17.4002	43.4761	20.171	1.01536	2.03148	4.97021	3.79358	6.41094	2.50668	0.841242	14.6549	4.78224	20.3679	0.902722	3.81566	2.02161	5.7729	17.3326	3.95135	1.1085	0.587934	2.10943	0.521633	23.9475
3-Hydroxyisovaleric acid, 2TMS derivative	1.27303	0.585136	1.9774	2.37385	0.701554	1.84253	3.86611	1.95825	2.76741	2.41122	0.834224	1.12331	1.24219	1.27084	2.44913	2.29394	0.98572	0.921415	1.48858	1.16015	2.00853	2.35248	1.91038	1.15327	1.14334	1.53401	2.42728	1.32047	1.18399	2.16325	1.60531	0.717947	0.826716	1.7677	1.98826	1.73785	1.49542	2.00808	1.30374	1.58399	1.2995	1.48894	2.40463	1.16318	0.751699	0.211442	0.235556	0.875491	1.25337
3-Pyridinol, TMS derivative	0.645006	0.436763	0.44829	0.839891	0.567335	0.5837	0.577806	0.414313	0.650803	0.751378	0.322699	0.345624	0.344111	0.354156	0.562018	0.337573	0.414742	0.34448	0.378895	0.548375	0.39041	0.599167	0.619336	0.399379	0.649758	0.431123	0.460643	0.503905	0.488081	0.507703	0.492423	0.549475	0.585508	0.698789	0.620722	0.507054	0.584752	0.918038	0.896709	0.580344	0.533462	0.528065	0.637994	0.443214	0.116027	0.259651	0.0604989	0.0977199	0.230306
4-Hydroxybenzaldehyde, TMS derivative	0.887476	0.853439	1.17551	1.52835	0.902907	0.797568	0.902849	1.04935	1.29513	0.96296	1.17589	0.782604	0.772037	0.617712	0.844428	0.688617	0.754831	0.662526	0.749324	0.677729	0.728728	1.22636	0.938962	0.591735	0.965749	0.669291	0.854951	0.964238	0.614671	0.483139	0.66861	0.670669	0.469736	0.909456	0.980788	0.764312	1.28475	1.65155	0.930656	0.958673	0.820578	1.45426	1.07473	1.25853	0.285665	0.291019	0.212655	0.458562	0.489669
4-Hydroxybenzeneacetic acid, 2TMS derivative	2.47094	0.999222	5.82765	1.83134	1.89593	2.34279	8.05921	3.25849	9.21343	15.4534	0.946169	1.01954	3.708	2.7361	4.0999	1.84551	1.53449	1.24864	3.62668	1.10786	1.43827	6.81876	32.6256	4.55072	4.21526	0.647341	0.807627	4.68551	0.367858	4.09394	17.4134	1.98435	2.5827	2.44392	12.8343	3.10152	12.8627	2.16615	6.30567	33.4108	0.204271	1.45573	2.47422	0.778594	1.28836	0.511587	1.91837	2.80537	0.718719
4-Hydroxybutanoic acid, 2TMS derivative	2.90611	1.47498	3.08861	5.12651	2.88787	4.05411	4.59016	3.7303	7.08667	3.39969	2.59726	2.46495	2.75475	2.31287	3.35904	2.61706	1.47085	1.92759	2.60585	1.39734	2.48449	23.5582	2.41456	1.96042	2.06459	2.37016	3.64069	4.30559	1.4129	1.81748	3.23493	1.54452	2.28686	1.89969	1.43186	2.96049	4.14262	2.87479	1.29615	2.60919	2.06943	2.90273	3.66398	1.8651	0.693202	0.300226	0.62472	1.46981	0.667423
4-Methylcyclohexylamine	0.853117	0.998218	0.871671	0.82581	0.978242	0.950755	0.829524	0.835401	0.852037	0.814667	0.822647	0.82213	0.848166	0.859412	1.00917	0.847345	0.855287	1.06128	0.818797	1.05497	0.872478	0.800629	1.08418	1.18113	1.02119	0.922447	1.16104	0.674075	1.07208	0.946227	1.11537	1.15258	0.944325	1.11875	0.942048	1.20008	1.1935	1.23811	1.21893	1.0382	1.01986	1.01789	0.728667	0.692705	0.292398	0.302393	0.276771	0.274791	0.338949
6,8-Dioxapentadecane	2.71875	1.85049	3.78473	2.44052	4.72741	2.12341	2.86259	2.43748	0.0934853	3.77606	0.77511	0.311843	1.30951	1.32205	0.888084	1.63056	1.06099	0.631342	3.13614	3.01754	2.55406	3.50988	3.60345	2.11833	3.27823	0	0	0.873657	1.25913	2.05334	1.44497	3.09637	2.48109	1.62709	2.918	1.88443	1.80465	0.823757	0.691248	0.987795	0.928075	0.888445	0.85943	0.696652	0.14635	2.46063	3.26515	3.00205	1.57116
7,9-Di-tert-butyl-1-oxaspiro(4,5)deca-6,9-diene-2,8-dione	0.881858	0.943777	0.832795	0.806124	1.01194	1.0117	1.05012	0.903599	1.1187	1.15201	0.665336	0.912003	0.985094	0.931591	1.13726	1.00817	1.00485	0.930126	0.675077	1.05808	0.906193	0.888044	0.949549	0.831594	1.07793	1.251	0.991981	1.12979	0.983968	1.06907	0.933792	1.07081	1.08683	1.0862	1.03969	1.05391	0.951949	1.19905	1.10376	1.2728	1.2717	1.1967	1.04163	0.817078	0.605383	0.542433	0.539327	0.46849	0.69191
8-Methylnonanoic acid, trimethylsilyl ester	0.736728	0.977948	1.81142	1.12259	2.71335	1.411	1.35448	1.29931	1.69361	1.9369	1.13149	0.900158	0.89346	1.27995	0.916272	0.857137	0.853175	1.58259	1.52602	1.16205	1.28571	1.85119	1.95096	1.47813	1.55208	2.09509	1.13636	1.33975	0.866012	1.80457	1.21722	1.43106	1.53633	2.90309	1.04216	1.57526	2.01845	0.884876	0.747664	1.60361	1.03445	0.651737	1.48599	0.986489	0.362242	0.286601	0.267111	0.339084	0.347993
9-Octadecenamide, (Z)-	0.819769	0.589843	0.926517	0.655621	0.636838	1.18674	0.571159	0.874891	1.01911	0.707851	0.888016	0.731697	0	0.771735	0	0	0	0.926053	0.832965	0.73524	1.65973	0	1.11236	1.06373	0.869164	0.667919	0.407886	0.320043	0.783047	1.12098	0.932816	1.07757	0.90468	1.09631	1.39272	0.960891	1.13849	0.555044	0.704724	0.505169	0.470398	0.473184	0.462041	0.670823	0.392336	0.4041	0.401969	0.365422	0.396086
9-Octadecenoic acid, (E)-, TMS derivative	1.15794	1.3076	2.77696	2.99985	1.97464	1.78702	1.50193	2.26013	2.46051	2.65749	2.45956	1.48933	2.72745	1.68337	1.55448	2.06414	1.42379	1.62506	1.833	1.50343	1.37675	2.55648	2.77319	1.34168	1.59672	1.11476	0.355609	1.9424	1.30748	1.79438	1.65284	1.76563	1.77868	2.35006	1.35224	1.68763	2.14967	2.14999	1.6794	1.8272	0	0	0	0	0	1.31284	1.66495	1.34349	2.08589
Acetamide, N-ethyl-	1.43196	0.223893	1.58706	3.48631	2.26892	4.52953	2.11003	4.60717	2.22804	3.79006	2.47699	4.12966	2.4428	3.78225	4.5606	2.15194	2.17864	3.5002	5.28629	4.36928	1.87464	2.33685	1.60432	0.00197552	4.39737	0.377968	0.000628856	1.75756	0.01446	2.34172	4.3832	6.01497	2.16066	6.11433	1.92715	6.29167	3.27242	1.36169	0.285101	2.85214	3.32026	3.1317	5.22398	3.05935	2.76432	0.259141	3.63329	0.509434	0.154653
Acetamide, TMS derivative	1.48385	2.35613	3.22265	0.760027	1.20247	0.0172308	2.67965	1.42909	2.71152	1.69125	2.22656	2.98557	0.966558	0.665757	3.64467	2.97447	1.14494	1.85981	0.00220791	0.884563	2.12898	2.23303	0.00867176	0.75003	1.06972	0.289765	1.53857	0.302978	1.62392	2.20361	0.883213	0.666259	1.38964	3.57657	1.11143	1.14327	1.32072	0.688664	0.752699	0.660866	1.22252	1.11927	2.94637	0.340766	0.322891	0.63466	0.546397	0.67661	0.275905
Acetic anhydride	0.806362	0.932549	0.890321	0.874677	0.917117	0.95291	0.894401	0.844631	0.840618	0.909455	0.782642	0.845317	0.779718	0.772866	0.95918	0.947196	0.901237	0.930164	0.869456	1.0259	0.797322	0.676248	0.709612	0.757907	0.828123	1.14091	1.04835	0.650873	1.1084	1.00048	1.07454	1.0272	0.959079	1.0561	1.00606	1.10853	0.999059	0.820283	0.981432	0.915629	0.955081	0.875555	0.888378	0.810716	0.370707	0.40358	0.363945	0.364989	0.35357
Alanine, N-methyl-N-methoxycarbonyl-, undecyl ester	0.494226	1.68655	0.468321	1.18453	1.443	0.872263	0.736914	0.725899	1.1413	1.22048	0.722472	1.57195	0.603166	1.10187	1.11026	1.85992	0.992583	1.09755	1.13671	1.04993	1.77197	1.53617	3.99766	1.00052	0.989991	1.12054	0	0.867386	0.658294	1.18638	0.954398	0.790263	0.949584	1.27362	0.825175	0.981899	1.22582	1.04432	0	0.862524	0.986182	0.78103	0.00980531	0.881878	0.0110966	1.27324	1.45235	1.07415	1.74468
alpha-D-(-)-Ribopyranose, 4TMS derivative	4.02676	12.0498	7.23936	18.6687	30.0307	14.6087	22.3989	0.27224	60.1495	98.7927	4.76949	2.62087	3.5731	6.45468	26.4892	2.28609	17.5493	1.9304	3.69271	35.3771	1.57369	2.54619	4.5345	1.8845	50.0355	3.37034	8.30085	50.7106	15.0088	10.1616	4.55559	46.9303	52.9045	14.0078	3.59007	10.1793	3.22741	68.4717	67.0282	5.1375	2.17514	2.7875	11.7289	51.4955	1.50859	0.89009	0.502579	0.888185	2.59342
alpha-D-(+)-Talopyranose, 5TMS derivative	0.773185	0.847592	0.86102	4.69258	4.33497	0.431815	4.99171	0.926903	0	5.13933	1.22319	1.53934	0.690971	1.69764	2.60296	1.09313	0.795778	1.1278	1.05165	1.11073	0.823197	2.3629	0.801091	1.04592	1.62512	2.0923	1.36425	1.16206	0.776706	0.829828	0.727551	1.25588	0.544125	1.81396	0.0683072	1.20718	1.92091	1.5571	1.03502	1.77209	1.44102	1.60594	2.23711	1.5499	2.04154	0.73288	1.22867	1.37042	2.4077
alpha-D-Mannopyranose, 5TMS derivative	1.24191	1.48983	1.01501	4.6513	2.95652	1.24601	4.83777	0.876967	2.23243	6.09129	1.07948	1.40943	1.42736	1.44734	2.28945	1.04411	0.802056	0.964602	0.819588	0.955845	1.7508	2.09942	0.692487	0.822242	1.12413	1.66321	1.20881	1.78868	1.2387	0.702387	1.20814	0.902133	1.03244	1.48029	1.30305	0.779417	1.07799	0.970838	1.32374	1.12103	0.795647	0.943811	1.11076	0.836392	1.58193	0.988117	0.694241	0.836179	0.808877
alpha-Tocopherol, TMS derivative	2.77063	1.78348	2.55301	3.77647	1.47266	1.9936	3.45832	1.69335	4.07451	0.99603	2.19461	2.12427	1.69729	1.6243	1.92237	1.94212	2.99062	2.27761	1.42625	1.85014	1.81021	4.59643	3.85818	1.75875	2.74718	1.77788	2.75654	2.84628	3.48824	2.01432	2.95145	1.95654	3.23674	5.55638	6.35701	1.68066	3.35898	2.21945	1.8063	2.18668	1.81914	2.79004	1.43873	0.508018	2.04456	1.78381	0.584928	1.09466	1.34815
Arabinitol, 5TMS derivative	2.21091	0.689487	1.28527	1.37919	1.57461	1.01498	2.51677	0.444864	2.38069	2.34611	0.873739	0.618809	0.702532	0.81899	1.33307	0.641919	0.784749	0.519188	1.39813	0.404339	0.968868	1.68389	3.4761	0.388762	0.441905	0.899261	4.24318	1.82491	1.2048	1.80403	1.29256	0.723472	1.21818	1.2525	1.56827	1.23614	2.799	1.30065	0.791642	1.32102	0.412175	0.465346	4.78563	0.540497	0.450003	0.249772	0.136816	0.169135	0.255456
Arabinose, 4TMS derivative	28.3809	133.119	60.454	167.913	411.599	119.987	176.438	15.1032	347.079	585.058	24.1459	12.1019	14.5806	24.6058	97.8149	6.9789	49.5136	8.27842	12.594	114.895	5.81968	16.7689	13.5799	6.06357	142.589	7.44916	15.4874	107.119	25.5631	16.7329	14.9647	105.634	89.4095	30.1563	21.3813	27.2385	8.90705	83.8392	72.6736	6.06103	2.57653	2.79937	11.1466	33.9906	1.99293	1.26337	0.957512	1.59393	3.59824
Arachidic acid, TMS derivative	0.434102	0.972649	0.92096	1.53067	1.13707	0.845288	0.965919	1.25796	1.22337	1.46847	1.0482	1.04968	1.3429	1.11293	1.20264	1.2997	1.12856	1.10521	0.989719	0.951855	1.02521	0.758939	1.14301	0.899555	1.10648	0.280385	0.133412	0.928654	1.01927	1.05288	1.02443	1.1941	1.11395	1.23166	1.09568	1.08545	1.21606	1.25701	1.04856	0.874479	1.16491	1.11981	0.413288	1.13568	0.24231	0.799544	0.524044	0.294792	0.71232
Arachidonic acid, TMS derivative	1.17976	1.50353	2.19447	3.43812	2.03336	1.25787	1.34601	1.08094	2.28251	3.15038	1.51505	0.932391	0.956538	0.646707	2.02948	1.03149	1.34272	0.607987	1.33776	1.05655	1.0702	2.26025	2.05018	1.33735	1.76687	0.753907	0.67051	0.763334	1.1696	1.27123	1.36494	1.83518	1.24253	1.73473	1.42188	1.44882	1.76468	1.53249	1.31053	0.987598	0.984758	1.11515	0.309104	0.655285	0.294825	1.91277	0.790919	1.17198	1.38677
Azetidine, 1-acetyl-2-methyl-	0.477375	1.08667	0.491824	0.206759	0.419364	0.920896	0.487207	0.872409	0.837069	0.898284	0.843361	0.90231	0.898035	0.476572	0.911048	0.931149	0.627931	0.357137	0.393604	0.599421	0.6142	0.464832	1.0928	1.16972	0.448805	0.893447	1.45344	0.370804	0.610465	0.73391	1.06525	0.729118	1.13823	1.67165	1.21369	0.638789	1.13101	0.784699	0.543481	2.01916	1.50098	0.757224	1.02367	0.988706	0.762325	0.0140274	1.42317	0.442113	0.71012
Benzaldehyde, 2,5-dimethoxy-	0.634434	0.776958	0.288756	1.3815	1.24732	1.04144	1.09413	0.553865	1.24519	2.01471	0.728192	0.544379	0.712176	0.620902	1.83986	0.608946	0.679224	0.580452	0.333701	1.3347	0.864474	0.792227	0.281141	0.715435	1.94692	0.559359	0.247816	1.09074	0.621697	0.712094	0.56686	1.24268	1.78805	1.35629	0.866532	1.11956	0.880173	2.71442	2.19558	1.53476	0.888659	0.877482	0.259678	0.836842	0.338733	1.4755	0.768547	0.790093	1.95267
Benzene, (1-butylheptyl)-	0.933618	0.897297	0.754387	1.0906	0.235525	1.02729	1.12255	0.931724	1.12486	0.882822	0.846489	0.867271	0.436909	0.908629	0.525914	0.926294	0.639408	0.885265	1.06515	1.08148	0.607414	0	0.892285	1.10421	0.775547	1.49261	1.18449	1.28475	0.766232	0.643814	0.762337	0.931165	0.698748	0.914721	0.356439	1.08284	1.02603	1.15072	1.30289	1.02078	1.08457	1.31496	0.815152	0.771945	0.219852	0.147193	0.199479	0.213807	0.323878
Benzene, (1-methyldecyl)-	1.48819	1.11634	1.0592	1.72535	1.17761	1.23051	1.19496	1.16378	1.30524	1.05199	0.776098	1.10196	0.894063	0.821504	0.860837	0.674896	0.6835	1.21851	1.05664	1.0659	0.523058	0.575517	0.54205	1.19682	1.00893	1.4012	0.829105	0.668195	0.386343	0.915595	0.949873	1.06682	0.756003	1.16033	0.983498	1.13787	1.11259	0.935844	0.551478	0.510661	0.529509	0.557048	0.942299	0.272935	0.930528	0.659474	0.546718	0.347946	0.877809
Benzene, (1-methyldodecyl)-	2.31024	3.30753	4.10508	3.2146	4.15111	3.86611	3.93248	4.32005	3.87373	2.8551	5.12234	3.73258	4.94414	3.80736	3.39083	3.17592	5.45139	3.5209	3.75108	4.16271	2.92451	0	4.04543	1.03042	2.9276	0	0	0	3.14135	3.07661	2.77392	1.02325	0.871074	3.01542	0	1.21918	0	1.9196	2.23918	0.371547	0.334052	0	0	0	0	0	0	0	0
Benzene, 1,4-dimethoxy-	0.929303	1.01635	0.699832	1.76422	1.24739	1.04651	1.07755	0.721583	1.09762	1.68871	0.825393	0.770031	0.767412	0.782343	1.36723	0.730056	0.79343	0.684284	0.683381	0.9634	0.806929	1.09457	0.895791	0.662253	1.17158	0.872763	0.621629	1.26997	0.858779	0.979733	0.85172	1.06851	1.27696	1.30353	0.997028	0.947782	1.03077	1.68253	1.35168	0.855536	0.721764	0.848751	0.642849	0.783045	0.382353	0.483492	0.131914	0.221511	0.548224
Benzene, 3-cyclohexen-1-yl-	1.41254	1.41568	1.16802	1.24448	1.16394	1.40726	1.28747	1.27621	1.30287	1.46288	1.04705	1.03465	1.00102	1.01946	1.04153	1.04329	0.886531	1.01122	0.947449	0.70427	1.00226	0.929288	1.08157	0.649437	0.741348	0.695818	0.476092	0.654552	0.746925	0.824844	0.721521	0.876097	0.637706	0.765095	0.871724	0.670366	0.811997	1.19411	1.0287	0.729762	0.720275	0.738467	0.710373	0.743301	0.164876	0.164195	0.213766	0.0950947	0.227274
Benzene, decyl-	0.835941	2.27476	0.722947	1.36823	1.93009	2.81198	2.84183	2.80298	2.78081	2.15614	1.44758	2.08485	1.51992	0.981673	0.719001	1.25838	1.15969	3.01661	1.97358	0.561219	0.686423	0.61805	1.15225	1.52852	0.690869	1.40764	1.36523	0.975302	0.466907	0.11801	0.456523	0.755403	0.486318	0.669732	0.8867	1.26847	0.9148	0.475158	1.67341	1.21399	1.12525	1.64182	0.81203	0.711611	0.15837	0	0.0694285	0.0781191	0.0801501
Benzenepropanoic acid, 3,5-bis(1,1-dimethylethyl)-4-hydroxy-, methyl ester	0.814777	1.47281	0.639451	0.493775	1.16346	1.37243	1.53065	1.43852	1.23453	1.61783	0.540326	1.47642	1.4571	1.2094	1.88738	0.958464	1.47989	1.55475	0.660751	1.4838	1.28527	0.911592	1.10049	1.47763	1.74405	1.38288	1.19884	1.45013	1.57266	1.57556	1.54145	1.71425	1.68311	1.32423	1.1819	1.46144	1.629	2.202	2.02564	1.55952	1.90215	1.37279	1.01048	0.845114	1.02788	0.802541	0.655848	0.588782	0.783596
Benzoic Acid, TMS derivative	1.00341	1.0083	0.941255	1.39515	1.25212	0.849226	0.946106	0.778296	0.890084	0.956817	0.63768	0.697759	0.819782	0.872873	0.777977	0.745073	0.682709	1.14569	0.977557	1.46508	0.992457	0.969213	1.07934	1.0518	1.65996	1.043	0.902141	0.627104	0.989689	1.06606	1.3262	1.75152	1.65115	1.03051	1.23229	1.41167	1.20381	0.946056	0.807067	0.865243	0.754631	0.873308	0.889196	0.823772	0.833297	0.644991	0.658962	0.630926	0.663434
Benzophenone	1.16892	1.47797	0.953277	1.45844	0.728208	1.59932	1.91809	1.48365	1.66685	1.48848	1.29724	1.96765	1.6899	1.55247	0.854519	1.2777	1.08393	1.37879	1.68147	0.877463	0.968692	1.08538	1.06721	1.13346	0.962023	1.18084	1.32672	1.23251	0.822405	0.613048	0.791502	0.859388	0.661224	0.776822	0.437026	1.11422	0.960734	1.04243	1.47423	1.21185	1.56384	1.31698	1.41461	1.23176	0.231527	0.229018	0.337056	0.450679	0.399962
Benzothiazole	0.879719	0.854673	1.02142	0.925558	1.01884	1.03053	0.953724	0.904364	1.1027	0.949969	0.852147	0.938715	0.912304	0.946401	0.934031	0.907793	0.879443	0.943469	0.956225	0.900542	1.04339	0.949557	1.0359	0.998677	1.01573	0.925673	1.02923	1.03342	0.962453	1.02975	1.14706	0.959943	1.05031	1.04033	1.09431	1.07706	1.09419	1.07061	1.03555	1.05896	1.12314	1.19362	0.820785	0.705248	0.393956	0.294702	0.278858	0.334883	0.361473
Benzyl alcohol, TMS derivative	0.68112	0.703294	0.827083	0.753206	0.731438	0.824517	0.891195	0.840832	2.18062	0.902475	0.797608	1.14257	0.785728	0.844484	1.0696	0.803133	0.805711	0.840638	0.899173	0.996981	1.05303	0.883941	0.933502	0.662007	1.11	1.11955	1.14127	1.02484	1.03951	1.11091	1.01159	1.07961	1.11618	1.0858	0.764444	1.11438	1.45908	1.27909	1.14542	0.744895	1.02665	1.05175	0.92516	0.640376	0.458021	0.480754	0.187394	0.25118	0.487372
beta-D-(+)-Talopyranose, 5TMS derivative	1.13524	1.40506	1.48148	1.15775	1.289	1.38972	1.31966	0.907445	1.93643	1.49646	1.02614	1.04049	1.29358	1.60836	1.26674	0.962048	1.38975	0.837142	0.952918	1.53918	0.921334	0.519976	0.958627	0.625737	1.51473	1.09211	0.938354	1.8608	1.36072	1.41091	1.03371	1.58142	1.4801	1.49764	0.877556	1.29062	1.03619	2.2151	1.71193	1.37191	1.34262	1.55219	1.40242	1.21527	0.843848	0.613997	0.543279	0.644602	1.31717
beta-D-(+)-Xylopyranose, 4TMS derivative	2.06271	1.21809	2.26209	2.66721	4.13392	1.71641	5.53411	1.73405	3.49853	4.41546	1.3084	1.28627	1.55391	2.01739	2.08949	0.75718	0.902069	0.991383	1.92809	1.65576	0.655484	1.61852	1.97856	1.34529	1.46851	2.02033	2.93964	3.5755	1.07675	0.912438	1.59036	1.58665	2.10006	1.59963	0.830645	1.27533	1.67804	3.76834	2.00381	1.61351	1.08418	1.34006	4.76863	1.99808	0.68904	0.23337	0.294469	0.859242	0.451594
beta-D-Allopyranose, 5TMS derivative	1.04615	1.22162	0.786374	0	0.693945	0.935551	0.0858091	0.353092	1.20027	0	0.377742	0.767224	0.823554	0.961407	1.1349	0.504646	0.969037	0.455232	0.437502	0.829935	0.810374	1.85598	1.01131	0.3914	0.939948	0.779213	0.745492	1.28136	0.851941	1.05487	0.724513	1.14662	1.31201	1.19998	1.18983	0.967377	1.51691	1.64525	1.10136	0.860082	0.397752	0.500354	1.17664	0.874237	1.25218	0.639706	0.454872	0.595432	1.30126
beta-D-Galactofuranose, 1,2,3,5,6-pentakis-O-(trimethylsilyl)-	1.21808	1.31087	1.66071	1.54898	1.45527	1.42798	1.6382	1.09475	2.40594	2.08179	1.54598	1.75352	1.83257	2.14889	2.28693	1.40651	2.05314	1.26399	1.55538	1.99752	1.47585	0.854369	1.61433	1.09617	2.14366	1.72955	1.21017	2.45273	2.05389	2.22986	1.05948	2.26131	2.35487	2.46844	1.45772	1.54033	1.84721	2.44837	2.22218	2.10518	2.01841	2.17556	2.04879	1.75696	1.05752	0.770194	0.497437	0.568877	1.26664
beta-D-Glucopyranose, 5TMS derivative	0.403239	0.420915	0.411352	1.28292	0.54462	0.454655	0.492236	1.25455	0.41774	6.25721	1.178	0.658412	1.31545	1.20865	0.408807	1.3341	0	1.30255	0.940883	0	223.47	41.6488	0	50.7434	13.6706	19.9685	16.7641	0	0	0	0	0	4.08868	3.78858	3.56423	0	3.25196	1.25853	0	4.44869	3.18981	3.32536	1.21681	0.780392	1.25385	1.15436	1.45897	1.51869	0
Biphenyl	0.646907	0.363411	0.385125	0.627607	0.857415	0.978981	0.784822	1.0738	0.369124	0.433669	0.917539	0.378168	0.857429	0.964127	1.36058	0.519223	1.03232	0.763689	0.986984	0.516525	0.66627	0.664869	1.79399	0.733189	0.632907	0.890979	1.55098	2.10977	0.60591	0.749729	1.22399	0.501364	0.390436	0.273341	0.453604	0.244502	0.706234	0.347764	1.60166	0.669983	1.31189	0.840603	0.90527	1.40486	0.181855	0.412693	0.381748	0.308125	1.04851
Bisphenol A monomethyl ether, TMS derivative	0	0	0	0	0	0	0	0	0	0	0	3.6043	0	0	0.999306	0	0	0	0	0	0	0	0	0	0	0	0	0	4.02238	0	0	0	0	1.69394	0	0	0	0	0	0	0	0	4.27711	0	0	1.47942	0	9.13622	6.80521
Boric acid, 3TMS derivative	0.0590234	0.0813095	0	0.10818	0.218701	0.0772583	0.209909	0	0	1.2543	0	1.18402	1.70021	1.47058	2.05498	2.44775	2.46199	2.96364	1.39512	2.23988	1.93993	0	0	0.805484	1.17415	0	2.21887	0	0.991253	1.55344	2.29152	1.68044	1.6165	1.90875	1.34801	1.37285	1.05808	1.3912	2.07239	2.38207	2.34778	2.76985	0.883047	1.18388	0.0309162	0.0483738	0.0359165	0.0381455	0.080925
Butanedioic acid, 2TMS derivative	0.658294	1.48142	4.49848	3.59876	3.12297	2.20098	2.11452	5.13694	3.62839	3.35401	3.61501	2.54405	4.23488	3.02804	4.24606	3.7304	2.8895	1.96973	3.18826	1.21076	1.71147	8.93199	1.66862	1.64284	1.1616	4.71448	2.27243	16.035	1.46272	1.79679	4.43542	1.41489	1.74381	2.75026	1.34585	2.80485	3.2623	2.31757	2.12654	2.95554	3.72128	5.3379	3.98442	2.98409	1.01718	1.52399	3.40117	4.08901	2.56833
Butanoic acid, 3,4-bis[(trimethylsilyl)oxy]-, trimethylsilyl ester	2.82876	1.57823	3.332	5.61868	1.60772	2.67978	8.99879	1.92011	14.6916	8.79012	2.25565	2.48959	3.96217	3.1043	3.60133	3.42663	2.62597	2.28852	4.95388	1.41226	3.8863	8.64875	3.2737	2.82991	1.18018	2.8882	9.89873	4.7686	3.65408	5.60824	3.81879	2.28831	39.4088	7.04811	5.15935	4.90768	5.84449	4.91524	4.10763	10.4192	1.68716	1.79204	8.60733	2.33773	2.9785	0.993596	1.30452	1.96607	8.03732
Caffeine	0.161279	0.0137801	0.0498351	0.294564	0.542214	0.0713735	0.0448451	0.0268296	0.0113093	0.00799592	0.0144591	0.0126952	0.123902	0.172699	0.00212092	0.0156261	0.574623	0.0203085	0.0313967	0.0501704	0.0459891	0.0161121	0.00731914	0.0374106	0.00803813	0.00159228	0.235726	0.546302	0.0387317	0.0933427	0.0136499	0.127518	1.38247	0.00692994	0.00563738	0	0.0441541	0.0303815	0.00181233	0.00760905	0.00208096	0.0330561	0	0	0	0	0.0201418	0.00819379	0.0712905
Caprolactam	1.40201	1.36224	2.1405	1.57121	1.9664	1.48208	1.76949	1.32784	1.52451	2.00229	0.535295	0.400585	0.681316	0.780605	0.61524	0.821262	0.612156	0.733311	1.58255	1.41407	1.47689	1.81373	1.99287	1.48375	1.61955	0.577513	0.770931	0.478008	0.821938	1.24495	1.78353	1.51912	2.30373	1.9389	2.5992	2.32166	1.24401	0.92579	0.926549	1.14936	1.25072	0.960145	0.732017	0.639796	0	1.06953	1.11937	1.07862	0.570009
Carbitol, TMS derivative	1.51027	1.67831	2.23033	1.66232	1.67318	1.34731	1.44319	1.23658	1.39654	1.4789	0.899121	0.852189	0.915725	0.898928	0.886785	0.963728	0.987263	0.767064	1.14553	1.72955	1.18739	1.22837	2.23002	1.74506	1.79812	0.853363	0.808861	1.02144	1.10288	1.22729	1.7716	1.78009	1.73752	1.53015	1.97438	1.74168	1.39112	1.06359	1.00717	1.51223	1.15203	1.76436	0.905616	0.844757	0.51975	0.675813	0.865865	0.820012	0.58828
Cholesterol, TMS derivative	1.62311	0.906801	1.42783	1.09573	1.19669	0.904521	1.2445	1.32767	1.37431	0.714749	0.922257	1.10395	0.770924	0.974759	0.722195	0.979158	1.06098	0.911645	1.23455	0.9659	1.24598	0.797308	1.41006	1.1033	1.16643	0.739955	0.859201	0.645759	1.20589	0.872678	1.17628	1.03909	1.19003	1.55539	0	0.907263	1.50885	1.04893	1.08683	0.637887	0.530353	0.604314	0.612874	0.550449	0.837699	1.05878	0.338761	0.437178	0.481117
Cholesterol	0.317086	0.105076	0.791898	0.192473	0.17586	0.0786602	0.107259	0.249375	0.108385	0.0206933	0.33239	0.164094	0.0900505	0.284502	0.0494709	0.316091	0.20454	0.317886	0.514401	0.0875946	0.417285	1.42549	0.35825	0.174428	0.104877	0.975821	1.05442	0.812386	0.121761	0.112469	0.212235	0.0614952	0.058991	0.239549	0.316474	0.0902847	0.160246	0.0628924	0.0561007	0.795736	0.86621	1.36345	0.797605	0.841505	0.933185	0.345523	0.82342	0.782599	0.849595
cis-4,5-Dihydroxy-o-dithiane, 2O-TMS	0.887231	0.72999	0.950459	0.877945	0.688637	0.867632	0.874918	0.84854	0.812183	0.749319	1.15303	0.810131	0.958074	0.767181	0.752709	0.885469	0.95008	0.508458	0.965895	0.550656	0.893227	0.889527	1.22848	0.960594	0.624936	1.04033	1.08451	0.937795	0.975024	0.868436	0.69777	0.833961	0.729118	0.701153	0.553259	0.51952	0.836659	0.785572	0.949471	0.91939	0.867635	0.956325	0.842528	0.740117	0.234901	0.367489	0.184149	0.288706	0.333253
Citric acid, 4TMS derivative	0	0	0	0	1.20366	1.50179	1.76832	104680	0	831934	24881	22546.5	18860.8	53705.5	0	14692.8	139479	3426.31	0	0	4367.13	0	8126.07	0	0	14137.8	0	8208.4	0	0	0	0	0	0	0	0	0	0	0	3514.26	7341.74	4868.74	0	0	1290.6	3682	0	3676.17	4745.18
Crotonic acid, TBDMS derivative	0.747717	0.695814	6.44216	19.3369	0.686615	0.744946	1.44215	0.852637	0.635823	2.01011	0	2.0242	3.90564	1.84698	2.20534	4.71233	4.23347	0.865281	1.30605	1.84058	0	1.36544	0.94136	0.768217	1.9337	0.839162	0.957056	14.2157	0.976472	0	0.967151	3.58405	4.3534	4.70669	8.79043	2.00331	0.820341	0.844823	0.789685	0.69824	1.17349	1.50916	4.05923	4.64701	0.105607	0.147857	0.69982	0.0548502	0.121337
Cycloheptane, bromo-	0.899806	1.34992	2.0562	0	1.34391	0	0	0	0	0	1.28146	0.688448	0	1.11507	0	0	0	1.01384	0.988637	0	1.39206	1.51303	0.851289	0	0	1.28293	1.42226	1.11015	1.02684	1.85931	1.0315	0	0.647376	0.874668	0.644575	0	1.06371	1.05654	0	1.0723	1.17901	1.21117	1.12296	1.12639	0.379766	0.270106	0.20701	0.260169	0.183233
Cyclohexane, undecyl-	0.871267	1.02526	0.882209	0.940166	0.985322	0.889917	1.29761	0.782453	0.820211	0.928518	1.02977	1.02445	0.832873	1.04415	1.05162	0.817574	0.987626	0.758836	0.559547	1.13269	1.09597	1.07471	0	1.15546	0.734489	0	0	1.09361	1.04335	0.712502	0.775992	1.25105	1.30341	1.03357	1.33824	1.40267	0.856477	0.721685	1.56527	1.78735	0	0	0	0	0	0	0	0	0
D-(-)-Citramalic acid, 3TMS derivative	0.085348	1.79534	0.928241	0.572726	4.31689	3.29921	2.71758	5.92984	2.27798	4.26819	9.42252	2.06303	6.69528	4.52678	5.2735	5.72321	4.44645	4.82464	0.863482	2.30475	1.93956	1.05399	0.067404	1.26417	2.56642	1.6257	1.02245	3.15861	0.690738	0.851541	2.56437	2.23559	5.167	1.20606	2.07123	3.0509	0.625206	5.45751	2.95477	6.80541	9.31369	4.92652	0.548428	2.72045	0.493452	0.872261	1.79921	2.81597	6.96725
D-(-)-Erythrose, tris(trimethylsilyl) ether, trimethylsilyloxime (isomer 1)	9.29123	1.70874	3.53868	4.87566	5.92012	5.67807	5.42575	0.829128	2.79668	4.5019	4.01894	1.16648	0.793053	2.69977	9.12197	0.0532752	1.00566	0.930471	5.29569	10.9263	1.70765	13.2696	32.4804	1.81571	6.02872	19.0637	27.5267	21.7359	19.0022	7.3233	0.888369	1.66693	13.3583	13.0932	14.3932	1.28228	10.5362	1.1194	0.955847	7.95296	0.764547	1.65598	13.9608	0.48426	4.77972	1.09896	0.272018	0.426347	0
D-(-)-Fructofuranose, pentakis(trimethylsilyl) ether (isomer 1)	0.39983	0.558367	0.88997	1.60851	2.38936	0.669444	1.13175	0.281956	1.23035	3.42068	0.590186	0.386142	0.453186	1.28054	0.992355	0.366121	0.715048	0.242479	0.628399	0.424457	0.437043	0.985044	1.20741	0.292715	0.48696	0.629088	0.52966	1.18758	0.362522	0.42356	0.358722	0.804634	1.30714	1.70952	0.457462	0.67974	1.78359	0.915611	0.484944	0.585613	0.358932	0.459268	2.01717	0.913517	1.14201	0.174573	0.0630997	0.242051	0.283717
D-(-)-Lactic acid, trimethylsilyl ether	1.14075	0.85313	1.55878	1.51373	1.61409	2.32698	3.018	2.15906	1.76289	2.29005	1.85624	2.20845	1.5643	2.00432	2.0517	1.59047	1.79799	1.79153	1.96217	1.86062	3.1245	4.9685	2.66309	1.95818	1.46882	3.23551	1.82459	1.91581	1.0659	2.73721	1.86501	1.26593	2.75522	2.21049	1.12217	2.96715	2.10561	1.99575	3.59186	3.39099	3.41908	4.25506	3.13497	2.73452	2.9297	4.35273	1.70115	2.37087	3.93653
D-(-)-Ribofuranose, tetrakis(trimethylsilyl) ether (isomer 2)	1.50192	1.9774	0.876569	2.15795	2.8098	2.22954	3.10562	1.88591	4.96756	5.56284	1.48281	1.38791	0.257397	1.19948	2.31308	0.934999	1.52037	0.756645	1.1249	2.09744	0.646477	0.729169	2.17489	1.86471	3.12552	1.83031	3.53993	3.80458	1.06184	0.897407	1.32254	2.41916	2.89957	2.51411	1.26147	1.72362	1.63019	3.6769	3.65623	1.75286	0	0.772798	3.30618	3.85145	0.662112	0	0	0.283826	0.441067
D-(-)-Tagatofuranose, pentakis(trimethylsilyl) ether (isomer 2)	2.83472	22.7452	2.7892	6.63282	35.7064	6.43973	6.87219	29.0024	7.28642	21.677	2.56843	21.8734	2.55255	26.7287	28.5548	2.52577	33.5088	2.39093	33.9014	5.7349	2.41705	15.4333	3.09299	40.7735	36.9549	8.33312	1.69162	7.83113	0	20.0387	21.868	5.2554	5.79069	37.2722	0	5.02369	2.90373	14.245	24.7939	0	0	0	1.1899	3.4079	0	1.94973	1.92013	3.03599	2.48142
D-(+)-Arabitol, 5TMS derivative	4.63155	1.01789	2.02222	2.88229	5.71788	1.17295	3.9649	0.777807	3.56125	3.97903	1.26164	0.774743	0.49204	1.26647	1.20572	0.659106	0.302249	0.834544	2.62663	0.460189	1.67106	7.83344	6.4688	0.477135	0.540643	1.16439	7.99175	2.09151	1.14169	1.50784	1.0488	0.617766	0.91632	1.03529	1.15378	0.954904	3.30339	1.0922	0.637159	4.6089	0.654089	0.711084	7.4158	0.681904	0.508647	0.283461	0.179472	0.215535	0.20038
D-(+)-Galactopyranose, 5TMS derivative (isomer 2)	0.938236	1.02748	1.04332	5.67199	5.19226	0.517686	5.97274	1.09572	0	6.14479	1.45405	1.84128	0.825484	2.02806	3.07729	1.29239	0.94399	1.32375	1.23961	1.04769	0.97169	2.77854	0.939591	1.2223	0.569429	2.39807	1.55576	1.32695	0.884563	0.948285	0.832122	1.13217	0.620594	2.06398	0.0793841	1.03459	2.18063	1.50238	1.13589	1.93876	1.56891	1.75425	2.45734	1.67597	2.1876	0.784799	1.30341	1.4634	2.55395
D-(+)-Ribono-1,4-lactone (R,S,R)-, 3TMS derivative	0.824166	16.402	25.1943	25.8158	20.3733	33.0164	23.1385	23.2611	28.5661	37.0797	20.2508	22.0466	22.4883	36.5154	21.2443	35.4182	32.1186	21.1292	19.3284	9.59423	19.954	26.8999	1.49407	21.1476	11.4869	18.5452	3.58658	28.2039	6.69464	14.8599	13.8765	14.9636	16.9904	12.2125	12.1308	11.4299	7.97573	18.4986	22.694	28.7848	38.7739	25.5012	0	16.5988	5.25765	5.60693	8.804	17.4983	0
D-(+)-Talofuranose, pentakis(trimethylsilyl) ether (isomer 2)	1.03825	1.55484	2.43434	3.15976	0	0.334729	4.44343	2.24166	4.85998	5.87427	0.958779	1.90148	1.27161	1.2578	3.64558	2.24204	1.80471	1.30465	0.803859	2.04722	2.43459	3.36766	2.92189	3.07392	2.41899	0.717298	0	1.04244	1.48033	1.82757	1.68778	1.98486	3.64246	2.6951	2.74429	0	2.44511	3.18292	1.90282	2.19134	1.93869	2.28008	1.18189	1.77429	2.65834	1.23547	0	0.990471	5.55148
D-Allofuranose, pentakis(trimethylsilyl) ether	0	0	0	0	0	0	0	0	0	0	0	0	0	0	0	0	0	0	0	0	0	0	0	0	0	0	0	0	0	0	0	0	0	0	0	0	0	0	0	0	0	0	0	0	0	0	0	0	0
D-Arabinopyranose, 4TMS derivative (isomer 2)	4.02676	12.0498	7.23936	18.6687	30.0307	14.6087	22.3989	0.27224	60.1495	98.7927	4.76949	2.62087	3.5731	6.45468	26.4892	2.28609	17.5493	1.9304	3.69271	35.3771	1.57369	2.54619	4.5345	1.8845	50.0355	3.37034	8.30085	50.7106	15.0088	10.1616	4.55559	46.9303	52.9045	14.0078	3.59007	10.1793	3.22741	68.4717	67.0282	5.1375	2.17514	2.7875	11.7289	51.4955	1.50859	0.89009	0.502579	0.888185	2.59342
Decane, 2,3,5,8-tetramethyl-	1.32724	1.14469	1.18818	0.676468	0.6693	1.29717	0.678496	1.24939	0.771825	1.30062	1.28246	1.30056	1.2242	1.26339	0.71536	0.766957	1.2202	1.18453	1.26516	1.10824	1.2057	1.47737	1.09346	1.09331	1.54497	0.728966	1.15889	1.212	1.14689	1.09911	1.12108	1.26887	1.33024	1.41367	1.2502	1.38443	1.3251	1.86772	1.47101	1.35896	0.865956	1.71678	0.968227	0.799989	0.450623	0.556013	0.528097	0.566436	0.767497
Decane, 2,4,6-trimethyl-	0.919868	1.05256	1.05849	1.09892	0.986592	1.15791	1.02885	1.02193	1.13268	1.22061	1.10995	0.958467	1.00432	1.05943	0.983506	1.04894	1.03334	1.12327	1.21779	0.878647	1.07264	1.01245	0.957584	0.884638	1.05264	1.105	1.05947	0.95018	0.893038	1.18274	0.994729	1.04339	1.04435	1.00559	1.08978	1.16674	1.13605	1.03575	1.17966	1.0805	1.22384	1.15638	0.933572	0.845214	0.247407	0.409534	0.177118	0.244163	0.499028
Decane, 3,7-dimethyl-	0.603499	0.629104	0.459931	0.9155	0.498304	1.13488	1.21538	0.79043	1.12685	1.57742	1.23056	1.17074	1.05989	1.27794	1.49984	1.33112	1.1806	0.960675	1.24057	0.844073	1.15199	1.00549	0.494503	0.822757	0.937181	1.25201	1.05872	0.933144	0.90377	1.14869	1.03984	0.947474	0.930107	0.950719	1.195	1.17993	0.968325	1.35365	0.788008	1.03578	1.44628	1.31039	0.715738	0.670179	0.405234	0.490992	0.390946	0.50509	0.570961
Decane, 5,6-dimethyl-	0.941543	0.926095	0.964063	1.03145	0.94434	1.04035	1.05355	1.0165	1.03522	1.06953	1.03605	1.0295	1.02788	1.08428	1.04087	1.12909	1.06692	1.0437	1.16672	1.00037	1.22467	1.07085	0.906604	0.791489	0.945282	1.01541	1.04457	1.04185	0.882001	1.11069	1.00739	1.1772	1.1386	1.09287	1.07249	1.03459	1.14031	1.14369	1.15315	1.01179	1.26968	1.10777	0.838249	0.813516	0.18784	0.430863	0.175802	0.184315	0.403378
Decanoic acid, TMS derivative	0.688201	0.965854	1.75443	1.0892	2.49441	1.36219	1.29071	1.28409	1.5655	1.77633	1.05206	0.885941	0.874905	1.23252	0.955251	0.812478	0.901702	1.54394	1.42583	1.19837	1.23155	1.27603	1.88362	1.44537	1.52197	2.16095	1.06827	1.49307	0.873309	1.74024	1.2309	1.27265	1.37007	2.82277	1.01306	1.39594	1.92843	1.06053	0.73471	1.51473	0.922479	0.815184	0.968612	0.855582	0.334668	0.350339	0.352468	0.458417	0.443985
D-Glucose, 5TMS derivative	1.26802	1.18416	1.19841	1.93906	2.38653	1.26568	2.28839	0.586346	1.62421	2.96617	0.549511	0.868295	0.652093	0.851884	1.64664	0.722153	0.839288	0.70946	0.44621	0.820294	0.979813	1.01039	0.934069	0.604351	1.06566	0.904948	1.02157	0.916942	1.0087	0.845591	1.13233	1.04934	1.11903	1.14106	1.2135	1.02488	1.19119	1.28224	0.92066	1.08689	0.784726	0.892393	0.882386	0.803836	1.12493	1.02474	0.771029	0.838599	1.09416
Diethylene glycol, 2TMS derivative	1.0562	0.51565	1.24636	1.23601	0.620963	1.1681	1.19536	0.989065	1.16565	1.05746	0.565653	0.73908	0.751	0.907073	0.907496	0.812603	0.571061	0.871751	1.10564	0.921564	1.11152	1.14883	1.19	1.20296	1.09426	1.04319	1.16906	0.941003	1.00962	1.00646	0.924852	0.957424	0.953381	1.04636	0.995565	0.978634	1.16376	1.05263	0.0568625	0.973509	0.893154	1.11001	0.291645	0.116912	0.0711476	0	0.0919941	0.114506	0.122365
Diglycerol, 4TMS derivative	10.6035	1.70949	1.1237	4.88634	5.88132	5.68048	5.43089	0.829537	2.79904	4.50772	4.02376	1.16717	0.793712	2.70286	9.13462	0.0534524	1.00651	0.930811	5.30113	12.8313	1.85852	15.3881	32.4841	1.81702	0.474678	21.0031	29.5145	24.3645	21.8117	7.30612	0.888782	1.66801	15.3206	13.0509	15.9252	1.28293	10.5085	1.11931	0.915021	7.8907	0	0	16.3916	0.484815	5.10404	1.09785	0.273729	0.426234	0
Diisoamyl ether	1.04903	1.25441	0.490362	0.611493	1.35892	1.39431	0.650605	0.962311	0.677775	0.00436416	0.86092	0.0328571	0.533437	0.448197	0.887969	0.558965	0.575171	0.903747	0.5777	0.922814	0.171325	0.0773531	1.64518	1.26337	1.04145	0.701463	0.948858	0.435241	0.9785	0.580986	1.03523	0.835101	0.60362	0.755064	0.614203	0.842339	1.28988	1.34884	1.62734	0.604216	0.75216	0.288334	0.0969753	0.130983	0.600884	0.189519	0.454465	0.476697	0.800822
Diphenyl ether	0.945533	0.920629	0.950252	0.98129	0.994411	1.00868	1.06835	0.970931	1.15864	1.04408	0.915576	1.03603	1.10359	1.01214	1.04211	1.04752	0.98006	1.10538	1.0953	0.829614	1.07413	0.985625	0.793687	0.844679	0.91931	0.784902	0.898898	0.938939	0.764734	0.813594	0.905904	0.847513	1.01788	0.841268	0.938686	1.01228	0.911755	1.12528	1.15242	1.25977	1.42093	1.29203	1.17181	0.991287	0.438963	0.440257	0.508324	0.580907	0.699497
dl-α-Tocopherol	0.349516	0.150581	1.30557	0.480505	0.149374	0.0892916	0.148822	0.21506	0.204551	0.0179668	0.70084	0.199313	0.12227	0.187308	0.0957198	0.474031	0.435525	0.594444	0.521556	0.104258	0.504804	3.69508	0.803261	0.155864	0.175058	0.714206	0.860093	0.772416	0.197961	0.188666	0.481862	0.0653415	0.100531	0.83471	0.580721	0.116525	0.241315	0.15371	0.107713	0.853738	0.673742	1.81158	0.538936	0.267399	1.96287	0.869575	0.487295	1.1319	1.07667
DL-Phenylalanine, TMS derivative	0.331819	2.96898	0.018371	0	2.16685	3.91315	0.513576	7.52353	5.89869	6.24612	8.63323	3.30964	9.17397	9.46102	7.00828	7.76657	4.88451	5.18254	3.56425	2.81313	6.34427	0.86348	0	3.09822	2.80497	4.59776	0.00339357	9.82251	0.32025	3.672	3.16907	2.3604	2.30499	3.27208	0.592025	3.77384	0.571075	10.8237	5.92877	8.20664	13.8076	15.152	0.0224129	2.94143	0	1.21394	2.31627	2.98256	4.87898
D-Mannose, 5TMS derivative	1.10851	1.33267	2.06887	0	2.30735	1.12748	0.376285	0.796765	1.61661	0.347031	0.984831	1.29686	1.31419	1.32005	2.1256	0.970382	0.751473	0.89739	0.76302	0.86288	1.64087	0.750961	0.660642	0.774115	1.06714	1.58032	1.15782	1.70125	1.19007	0.654948	1.16764	0.873261	1.00138	1.43666	1.08802	0.761857	1.22922	0.94635	1.32216	1.10744	0.787462	0.934258	1.58883	0.840762	1.65052	1.02865	0.72565	0.872801	0.858367
Dodecanamide	3.25691	3.80496	1.09548	2.92316	4.40095	2.4432	3.49531	1.29394	0.947207	4.05658	0.448598	1.2129	0.204115	0.748474	0.593571	0.172258	0.47904	0.874564	0.600268	0.548145	2.23696	0.611066	1.58787	1.41786	0.53311	0.47251	0.208816	0.292112	0.261995	1.46686	0.671782	0.810788	1.2649	1.59026	1.88726	0.643852	0.749148	0.0832311	0.151504	0.311342	0.195109	0.26607	0.169166	0.561202	0.125166	0.141403	0.0542486	0.120264	0.139181
Dodecane, 2,6,11-trimethyl-	1.04583	0.72565	0.951698	0.888849	0.823968	1.10157	1.17957	0.767041	1.09336	1.53035	1.19337	1.13521	1.02759	1.23885	0.556767	1.29009	1.14408	0.930859	1.20194	0.817713	1.11591	0.973914	0.85412	0.796804	1.03348	0.850828	1.0251	0.903498	0.897576	1.11219	1.00681	0.917399	0.900607	0.920595	1.15719	1.14264	0.521658	1.30729	1.17557	1.00078	1.39764	1.26649	0.698528	0.654467	0.397734	0.482061	0.383913	0.303052	0.560361
Dodecane, 2,7,10-trimethyl-	1.01236	2.13346	1.00973	1.41011	1.06493	1.31483	2.36838	1.37479	2.1351	2.50206	1.40125	2.3152	1.11278	1.00099	0.816545	1.38067	0.959603	0.953878	0.938809	0.721265	0.914477	0.834179	0.871729	0.657559	0.77199	1.14301	1.03359	0.837335	1.25297	0.859014	0.843857	0.875066	0.991101	0.984632	1.0427	1.07996	1.1018	1.47161	0.990762	0.957425	1.23621	0.944395	0.76105	0.715019	0.430555	0.430984	0.460569	0.441796	0.59788
Dodecane, 4,6-dimethyl-	1.62817	0.011398	2.95039	3.17577	0.54891	1.07059	2.78214	4.95265	1.56304	2.20218	0	1.27003	6.85747	0.11062	4.22893	4.95908	0.169853	1.76751	3.57731	0.0845611	5.22411	5.88602	9.38192	4.1667	1.99818	2.3888	1.40666	0.0102933	0.754353	1.92768	3.38304	5.05502	3.09928	7.61619	2.10091	1.9637	5.93487	1.80794	2.65086	0.760171	0.109896	0.173279	0.705498	0.408841	2.66812	0	0.292091	0.410851	3.54737
Dodecane	0.902438	0.868474	0.861335	0.937097	0.960618	1.00815	0.985611	1.00278	0.999257	1.07899	0.9792	0.940892	1.00747	1.01408	0.945521	1.02091	0.990593	0.95488	1.00185	0.866394	1.0447	1.00607	0.926135	0.861373	0.965951	0.953617	0.90822	0.936136	0.913344	0.955151	0.915123	0.985644	0.970494	0.966492	0.946801	0.989852	1.00177	1.13818	1.11404	1.09824	1.15705	1.06189	0.813179	0.768036	0.487161	0.451818	0.361243	0.467179	0.638251
Dodecanoic acid, 1-methylethyl ester	0	2.04093	0	1.78814	1.0412	2.2996	1.98787	2.35521	2.35924	2.03006	1.91347	1.92983	1.8679	0.626386	1.30512	1.86902	1.44103	1.47787	2.24176	1.38501	1.14211	0.59183	1.57965	1.91444	0.564506	1.95113	1.92213	1.65765	0	0	0	1.30729	1.001	0.502175	0.775317	1.88441	1.44779	0	2.12384	1.677	1.77685	2.10922	0.856013	0.307536	0.0785183	0.0668201	0	0	0
Dodecanoic acid, TMS derivative	0.891383	1.49732	1.69874	1.4055	6.11393	1.91034	1.68685	1.76535	2.95156	2.34631	1.79766	1.19523	1.49536	1.41244	0.520621	1.38874	0.802986	1.94608	1.61559	1.33295	1.10727	1.22571	3.3178	1.73727	1.67849	1.14123	0.574069	1.53618	0.588109	1.15203	1.89885	1.73537	1.09978	1.55473	0.762661	2.16508	2.15492	1.62691	1.17125	3.15547	1.91951	1.45624	0.356905	0.544438	0.582056	0.575659	0.653065	0.763007	1.17776
Dopamine, N,N-dimethyl-, dimethyl ether	0.0760109	51.9876	10.7761	9.90828	12.4837	14.167	9.38081	22.9036	7.58233	11.1229	5.22269	2.1545	6.48693	3.21585	4.73489	4.45593	3.34999	3.51969	1.20256	1.75861	2.63597	1.97317	78.259	1.64521	1.42842	1.4947	1.03953	32.9412	0.822356	0.834861	1.05273	0.852988	0.85341	0.760901	0.873411	0.813014	0.797205	0.581476	0.343912	0.558769	0.519077	0.389314	0.158221	0.2148	0.0484259	0.0574386	0.0941771	0.149713	0.509405
Erythrono-1,4-lactone, (E)-, 2TMS derivative	1.69641	1.10582	1.2283	1.49844	1.37523	0.909873	0.782261	0.408191	1.0086	0.467118	1.70611	0.992706	0	0.225648	0.23954	1.28737	0.842566	0.827502	0.0838747	0.997772	0.590886	0.148802	0.187636	0	0.771709	1.11771	1.52105	0.623204	0.649063	0.983741	0.785757	0.502961	0.125467	0	0	0.177528	0	0.898163	0.258515	1.35734	0.3147	0.746399	0	0.299947	0.669528	0	0.141367	0.503369	1.08683
Fluconazole, trimethylsilyl ether	0.533222	0.979249	0.693363	3.25105	0.596593	0.431946	0	0.137651	0.493417	0.0674042	0.167225	0.0399717	0.173625	0.321795	0.293591	0.174769	0.100261	0.0621373	0	0.0504854	0.548967	1.84129	14.8202	0	0.106905	0.377666	0	0.658162	0.0729318	0.383837	0.226296	0.11867	0.256527	0.519625	16.6328	0.144332	0.61142	0.269477	0.668522	0.518276	0.640038	0.191038	1.03571	0.818517	0.630264	0.20951	0.327927	0.150532	1.56109
Fluconazole	0	0	1.87697	0	0	0	0	0	0	0	2.67754	0	0	0	0	0	0	0	0	0	0	0	2.77735	0	0	0	0	0	20.8079	0	0	0	0	0	5.26735	0	0	1.68408	0	0	0	0	0	0	0	0	0	0	0
Fluoranthene	1.71852	0.907789	0.679418	0.890658	0.942086	1.05819	0.837264	0.946409	0.871592	1.00173	0.945625	0.608542	1.05077	0.545691	1.01317	0.942148	1.04651	1.14299	1.24671	1.11629	1.40973	1.01132	1.37243	1.18717	1.27481	1.13727	2.14388	1.20053	1.08699	1.13113	1.12719	1.13982	1.10814	1.14914	1.27455	1.2081	1.23849	0.937325	0.782718	2.04009	1.72357	1.60774	1.65935	0.998197	0.530009	0.583592	0.578457	0.550101	0
Formamide, N,N-diethyl-	1.11286	1.03955	0.886331	0.884204	1.00505	1.28716	0.876646	0.921101	0.899017	0.905932	0.860563	0.87901	0.885217	0.869666	1.02708	0.923516	0.90684	0.992508	1.00542	1.02195	0.903411	0.829023	1.03744	1.10057	1.12889	0.835622	0.899229	0.788686	0.931838	0.95262	1.11151	1.06172	0.990731	1.12326	0.978366	1.11112	1.13301	1.17548	1.19391	1.03404	1.02166	1.00002	0.6761	0.60819	0.282645	0.404812	0.300988	0.291444	0.329442
Galactopyranose, 5TMS derivative	0.710018	0.778116	1.83202	3.73751	2.37245	0.926708	3.92758	0.717063	0.496599	5.02236	0.89891	1.1888	1.20764	1.21751	1.96841	0.900529	0.701598	0.837996	0.713105	0.812361	1.5446	1.8705	0.628693	0.736296	0.895149	1.52754	1.12139	1.66922	1.16072	0.642267	1.14728	0.795944	0.848109	1.42469	0.429331	0.641308	1.23057	0.916306	1.42501	1.19652	0.852994	1.01429	1.77128	0.934521	1.82385	1.13353	0.799887	0.960416	0.942663
Glucopyranose, 5TMS derivative	1.26539	1.18172	1.19015	1.93428	2.39019	1.26318	2.27758	0.58522	1.62424	0.218349	0.548491	0.866572	0.65024	0.850354	1.64464	0.720728	0.837778	0.708119	0.416696	0.81888	0.975451	1.00838	0.932543	0.603282	1.06393	0.901263	1.01988	0.910821	1.01212	0.845763	1.12879	1.04771	1.11813	1.13936	1.21386	1.03098	1.18869	1.28093	0.919721	1.08585	0.780286	0.887095	0.883724	0.80372	1.12246	1.02228	0.769288	0.836642	1.09154
Glycerol monostearate, 2TMS derivative	1.9776	2.37452	3.14316	3.75425	4.28886	2.67012	3.47614	0.798168	1.19356	2.14026	1.41684	1.47542	1.33357	1.04777	2.11811	0.771268	1.80429	0.969714	1.23743	2.54758	1.95021	1.09452	3.67436	1.06028	2.8989	0.640792	0.746995	0.99191	1.32595	1.98412	1.91504	2.47943	3.06197	6.19883	3.0725	2.07914	7.22507	2.66162	2.29064	0.868866	0.765708	1.06548	1.48203	1.05487	0.273891	1.19139	0.313573	0.255562	0.947793
Glycerol, 3TMS derivative	1.56103	1.03553	2.45287	2.39437	1.80527	1.14963	1.31399	2.44246	2.44341	3.01685	2.67886	1.04603	3.07612	1.18229	1.47586	1.90369	1.42955	1.55897	1.43379	1.01133	1.28474	3.52438	2.68328	1.33404	1.14864	1.5368	1.50724	1.71846	0.875724	1.17614	1.24614	1.61763	1.39935	2.79478	1.10517	1.05298	2.73901	1.39546	1.1333	1.18415	0.62977	0.851155	2.64629	0.76948	0.77667	0.748754	0.87803	0.967714	1.65131
Hentriacontane	2.23221	2.24419	2.01737	2.21878	2.29421	2.46683	2.50698	2.40588	3.28368	4.67039	2.27665	2.28744	2.40604	2.4306	2.60262	2.08975	2.20164	2.38399	2.19148	2.12087	1.66383	2.27916	2.06547	1.67302	1.48173	1.96321	1.87293	2.26878	2.32348	1.74352	2.59215	2.29303	1.87592	2.01763	1.88787	1.6967	2.32766	2.22965	2.29468	2.45309	2.25684	2.53911	2.12064	1.35297	2.3275	1.4469	1.28294	1.53195	1.68576
Heptacosane	2.64555	2.33402	2.53421	2.96117	2.96212	2.67697	3.12819	3.93318	3.51584	2.94888	2.86132	2.91716	2.75984	3.30814	3.86811	2.35223	2.40548	3.12992	2.26116	2.83211	2.32501	4.33005	2.11676	2.45963	2.08761	3.06108	3.61193	3.54477	1.80241	2.43532	1.9482	2.45002	2.45873	2.42049	2.52504	2.57914	2.82577	2.24154	2.40893	1.97989	1.8227	2.77183	2.08337	1.5528	2.07908	1.31506	1.08125	2.72807	3.01913
Heptadecane	2.35492	0	0	0	2.51087	0	0	2.27004	2.11528	0	0	2.21602	2.04864	0	0	0	2.75636	0	1.48127	0	0	0	1.69317	0	1.85368	3.09452	4.03459	2.69651	0	1.89202	0	0	0	0	1.79508	0	0	1.96793	2.7339	1.87066	2.04525	1.90936	4.79594	0	6.79962	0	8.89261	8.60317	0
Heptadecane, 2,6-dimethyl-	1.13231	0.985874	0.479724	0.847631	1.4937	0.587258	0.952318	0.964357	0.962322	1.09771	0.512761	0.958192	0.942205	0.987056	0.492208	0.351961	0.366927	0.942721	0.901489	0.832723	0.478176	0.545837	1.04565	0.799796	0.82754	1.01733	0.94834	0.953306	0.949974	0.479027	1.11122	0.854254	0.479831	1.1285	0.853781	0.863826	0.968314	1.11041	1.07714	1.03628	1.1753	1.04857	0.832528	0.744322	0.509347	0.484863	0.511673	0.515327	0.684828
Heptadecanoic acid, TMS derivative	0.743561	0.945009	1.19154	1.62601	1.0807	1.21635	1.11611	1.26568	1.45028	1.94252	1.49444	0.601475	1.32861	0.581834	1.16312	1.3873	1.04216	1.00544	1.08582	1.01285	1.02635	0	1.0885	0.885991	1.12943	0	0.175246	0.324048	0.95264	1.00717	0.946637	0.961696	1.02761	1.25114	1.03552	1.10075	1.18783	1.12451	1.08563	0.322227	0.925889	0.909942	0	0.57623	0	0.801157	0.459378	0	0.401607
Heptane, 2,2,4,6,6-pentamethyl-	0.423374	1.03169	1.21232	1.39525	1.12719	0.736254	1.39303	0.766086	1.17968	0.951617	0.812202	0.934582	0.982155	0.720769	1.39244	1.04873	1.05753	1.17389	0.805205	1.33831	1.09384	1.11476	1.02613	1.16497	1.57405	0.198329	0.717392	0.358876	0.534906	1.11074	1.46554	1.63119	1.28717	1.41523	1.7602	1.92446	1.74227	2.29351	2.1442	1.35847	2.10697	1.3856	1.08187	0.876555	0.184218	0.0104055	0.596306	0.404564	0.25979
Heptanoic acid, TMS derivative	0.0596797	0.00480598	0.198678	0.192677	0.937573	0.16975	0.191342	2.59952	43.1804	0.683817	36.9015	1.04768	0.00424008	55.1247	0.306162	19.0716	14.1498	0	23.1697	25.3331	32.571	7.86789	7.42728	11.866	30.2218	0.515825	0.452693	0.199885	0.0259923	12.032	25.5413	2.94234	0.128415	5.64684	1.7455	0.322627	16.643	4.92176	1.58128	7.81528	4.64322	10.0993	6.69639	3.02658	1.02299	0.86653	1.70373	0.426111	1.72266
Hexadecanamide	0.23441	0.276196	1.76937	0.543318	0.227219	0	0.493099	0.35043	0.442236	0	0.295407	0.0241879	0.54152	0.165391	0.216004	0.56969	0.226184	0.224924	0.270203	0.186423	0.236209	2.06699	0.334752	0.335878	0.32184	0.510804	0.537707	0.525856	0.219432	0.21271	0.308894	0	0.209023	0.300136	0.25515	0	0.667517	0.303909	0.172579	0.832755	0.394789	1.39794	0	0	0.0618873	0.0059399	0.0161093	0.0697511	0.482307
Hexadecane, 2,6,10,14-tetramethyl-	0.574682	0.616493	0.322316	0.491183	0.366987	0.601517	0.420655	0.773711	0.556637	0.485914	0.793871	0.735865	0.71243	0.653569	0.65666	0.908335	0.676345	1.1714	0.917677	0.755703	1.04309	1.07902	0.542564	0.82703	0.828623	0.844092	0	0.480961	0.850785	0.77982	0.909414	0.83426	0.954329	0.954994	0.938099	1.02198	0.932056	0.922642	1.12127	0.696733	0.787922	0.70498	0	1.34974	0	0.382518	0.463774	0.612283	0.503643
Hexadecane, 2-methyl-	0	0	0	0	0	0	0	0	0	0	0	0	0	0	33.367	0	0	0	0	0	0	0	0	0	0	0	0	0	0	0	0	0	0	0	0	0	0	0	0	0	0	0	0	1.83643	1.92817	1.9709	1.92542	1.93938	2.50236
Hexadecane	1.05381	1.04209	0.925817	0.986059	0.734336	0.989991	0.99264	0.976058	0.979499	1.01128	1.01078	0.985008	1.0401	1.051	0.857138	1.03128	0.943334	0.644238	0.992663	0.676187	0.970155	0.997356	0.981116	0.933413	0.734509	1.0756	0.987701	0.982833	0.990176	0.982824	0.921693	0.97121	0.864884	0.656256	0.731742	0.749851	0.99639	0.959468	1.12122	1.50757	1.22247	1.09304	0.838775	0.766226	0.63496	0.653909	0.659914	0.651061	0.821577
Hexadecanoic acid, 4-[(trimethylsilyl)oxy]butyl ester	3.26302	0.725176	2.9033	2.31793	1.65962	1.19148	1.09062	1.12663	3.30942	1.16567	2.88992	0.91035	0.647453	1.2538	0.655021	0.816482	0.939355	0.645714	1.60429	1.22705	1.13357	4.8797	2.45622	0.809679	1.59431	2.15346	3.73461	2.26473	0.554522	1.24247	1.38924	1.47493	1.53651	1.36398	1.64144	0.915833	2.23226	1.24483	0	0	1.81963	2.31919	2.16825	1.71451	1.45095	1.02763	1.22734	1.37452	2.204
Hexanedioic acid, 2TMS derivative	0.440048	0.61745	0.736155	0.792446	1.07058	2.45027	1.742	2.29662	3.20539	2.52287	2.40574	1.07284	3.3984	1.55622	2.83005	2.61698	2.14201	1.79812	1.25008	0.863841	2.21739	1.17879	0.791625	0.888372	1.44023	1.45999	1.03434	2.56672	0.893027	1.49939	0.939036	1.00323	1.43758	1.55422	0.977312	1.2869	1.05621	2.48528	0.756237	1.98861	2.49959	1.34933	1.78285	0.733371	0.314795	0.156202	0.240308	0.322965	1.42319
Itaconic acid, 2TMS derivative	0	0.956334	1.28968	1.41158	4.97048	2.75393	3.63343	4.67573	6.11487	6.57137	0.910469	1.93035	2.92833	3.17412	4.28722	4.87075	4.51691	4.37543	4.69311	4.49318	4.95679	8.16078	9.05368	4.07584	4.22924	1.09511	3.17644	11.7798	7.24781	13.298	14.932	10.1869	9.08198	13.3191	7.77256	7.68658	11.6807	1.76478	3.00951	4.06763	5.01929	6.32687	1.72296	2.4857	1.07945	1.3413	1.3045	1.59166	0
L-(+)-Lactic acid, trimethylsilyl ether	1.14073	0.862616	1.63364	1.54492	1.64223	2.3374	3.03186	2.20813	1.84157	1.31002	1.85895	2.24184	1.5705	2.11458	2.07311	1.67504	1.46876	1.83098	2.05077	1.87419	3.16604	5.02701	2.69715	2.00915	1.47621	3.25131	1.86276	1.9514	1.08085	1.55674	1.89592	1.26699	2.75965	3.10987	1.12305	2.98599	3.07386	2.02815	3.60485	3.4296	3.45739	4.28096	3.22132	2.75352	2.99462	4.41941	1.08976	2.43378	3.98802
L-5-Oxoproline, , 2TMS derivative	0.0261782	0.841957	0.312896	0.169372	1.07721	1.7339	1.24872	4.43044	1.22436	2.36518	3.85628	1.93145	4.69332	2.23351	3.24723	3.97093	1.99554	3.47525	1.73467	0.991694	2.76671	0.97533	0.163417	1.02111	1.16358	1.29254	0.259274	2.25629	0.567732	0.383639	1.16339	1.1709	1.28643	0.663826	0.865492	1.4636	0.531559	3.78074	1.68469	5.27349	4.93682	3.229	0.0241604	2.02731	0.245402	0.852267	1.60036	2.04898	2.43061
Lactic Acid, 2TMS derivative	1.38911	2.26594	0.782219	3.90725	4.80664	0.00176763	3.80557	0.755056	0.927544	5.54313	0.81795	5.35931	0.109808	0.116272	0.692841	0.932557	3.65473	5.94906	0.740837	2.31271	3.40431	3.72777	3.66266	5.48515	1.81834	4.95057	5.78326	4.51692	3.64598	5.32104	2.80182	1.36615	2.39383	6.83775	1.3597	4.33299	2.72595	3.94806	3.02886	5.18774	6.72214	3.96524	4.59917	2.26747	2.38882	2.8811	2.10539	1.59096	2.70383
L-Alanine, 2TMS derivative	1.40285	0.716781	1.60479	1.80165	1.33635	1.56951	1.22798	9.21694	2.23344	1.93595	3.83668	1.40021	3.53437	2.19861	2.66208	1.55307	2.41546	0.810223	1.543	0.895181	1.28434	1.88932	1.13874	0.858651	1.22346	1.21312	1.93302	1.29201	0.983312	1.01786	1.05157	1.0578	1.04252	1.33317	1.0177	1.11161	1.28491	3.28149	1.7439	1.82057	2.49428	1.61886	3.37012	0.487139	0.570549	0.455763	0.349155	0.481894	0.84784
Levetiracetam	3.40216	8.82163	3.32184	0	0	4.17305	4.04903	15.9854	3.40638	3.63397	1.30052	3.16867	1.06432	4.50889	1.70073	3.18819	0	461.506	2.15058	0	4.12115	0	7.24239	0	0	11.6849	1.01469	0	0	0	2.50294	2.31968	0.337981	0	2.48609	3.41243	1.90374	2.34509	1.42501	1.29346	2.12605	0	1.49572	1.12609	0.488182	2.34477	1.33569	0	2.60968
L-Glutamine	21.444	0.983685	454.942	263.366	0	1.24818	0.323468	0	19.8741	0.629857	0	0	0	0	0.858316	4.88731	0	0	112.726	0	12.8015	31.1076	59.756	1.2154	0.3682	0	0	0	6.24941	0	0.311842	0.195741	0	0	0	2.32933	42.4952	0	0.355013	0.38233	0.538279	0	0.0719231	0.49317	0.0829131	0	0	0.0454509	0
L-Isoleucine, TMS derivative	7.94813	0.977336	3.61632	0.0613776	0.599994	3.18501	1.22734	3.86198	2.62657	1.33988	2.76827	2.31463	1.96908	2.14863	1.94372	2.05756	0.0410759	1.6963	5.09214	1.31505	2.72343	4.48622	0.728953	1.38795	2.43098	2.03726	0.529983	0.628814	1.15893	2.88027	1.06284	2.13336	0.212734	1.75522	1.43302	0.962302	3.21483	2.65385	1.10758	1.63747	2.33656	1.86571	2.61585	2.06511	1.08612	0.279635	0.245112	1.58763	1.88525
L-Leucine, TMS derivative	1.71251	0.769141	0.799762	1.35473	0.634613	1.99665	1.59251	0.0536598	2.46321	1.76583	2.45515	1.37755	2.24546	1.70868	1.97916	2.76251	1.72322	1.89317	1.56462	0.497705	0.236489	0.675725	1.63527	0.631685	0.53983	1.18792	1.67001	0.683678	0.783104	2.33908	1.01515	0.991875	0.307247	0.817148	0.563883	0.485571	1.78489	1.79564	1.35758	1.49621	1.78965	2.2594	1.82355	1.27225	0.651614	0.9123	0.643818	0.78323	2.65437
L-Proline, TMS derivative	0.451762	1.23298	0.631423	0.089157	1.65398	0.0615795	0.0187109	1.41381	0.0580343	0.146145	1.6121	0.159513	0.908472	0.119014	1.71694	0.654206	1.67023	0.218849	0.489946	0.121799	0.26607	2.73929	1.69541	0.0938354	0.12444	0.417683	0.3004	0.144066	0.0516901	0.314905	0	0.118267	0.155024	0.281659	0.224777	0.0927119	0.0317961	0.540045	0.38818	0.512307	0.871005	1.30795	1.64161	0.0873446	0.591791	0.954565	0.448546	1.19661	2.72378
L-Pyroglutamic acid	2.92105	1.49537	1.35896	0.601931	2.01818	2.4347	3.52022	3.13315	2.78167	1.25012	4.53275	5.19342	2.53608	3.14133	2.89399	4.80734	2.24657	4.98938	0.142929	1.43323	7.1693	6.47211	0.124693	2.86832	1.21687	5.2465	3.02829	6.19393	5.75186	0.513899	2.31824	1.0867	1.11031	0.282489	1.54495	3.34292	3.13745	4.13872	0.971058	4.08263	3.41571	3.25066	0.159569	3.43579	0.535603	1.36355	0.982767	1.45725	0.657071
L-Serine, 2TMS derivative	2.03014	6.26973	2.65307	1.95287	7.07671	0.974254	0	0	0	6.15872	3.85098	0	0	17.5498	0	3.45844	0	0	0	0	3.99532	0	2.18654	2.11211	0.702719	42.6632	2.12878	22.7344	5.82431	3.2194	2.51577	3.52808	1.67356	1.60589	2.52005	1.87608	3.56745	0	0	98.0254	128.847	147.046	2.22142	0	0	0	7.4787	15.0824	25.4161
L-Sorbopyranose, (1S,2R,3S)-, 5TMS derivative	0.368176	0.509199	0.756536	1.64195	2.15764	0.588689	1.07258	0.239197	1.13039	3.18075	0.493516	0.33788	0.320959	1.03876	0.977468	0.25334	0.617789	0.188289	0.517486	0.438663	0.420496	0.834747	2.09806	0.252589	0.374278	0.424607	0.290168	0.942732	0.392489	0.438074	0.409881	0.687787	1.06734	2.84949	0.775739	0.656174	2.74248	0.82906	0.442377	0.485141	0.258693	0.387167	1.14146	0.616514	0.664253	0.21718	0.108055	0.214781	0.318807
L-Threitol, 4TMS derivative	1.49791	0.239055	0.99537	1.04387	1.45541	0.844144	3.34789	0.647585	4.45462	4.72969	1.44251	0.589285	0.804419	2.57363	4.65021	1.06389	2.08441	1.3472	2.69428	0.309039	1.10215	1.96393	8.82893	0.223569	0.163055	1.08781	7.29744	1.96702	1.98382	1.38805	0.825679	0.509617	1.42631	1.25382	1.10507	0.883361	2.51206	1.07628	0.404631	1.1111	0.4203	0.461632	15.9828	0.572626	1.05512	0.502182	0.276811	0.373919	0.307306
L-Threonine, 2TMS derivative	0.4744	0.88773	0.167611	0.227596	0.163084	0.524385	0.0692342	3.04769	1.95151	2.3882	0.287384	0.0726807	2.28628	0.0932385	5.60812	0.0702799	0.099373	0.0684383	0.0469058	1.52763	0.0976656	3.88225	0	0.909091	2.06595	0.21439	0.546619	0	0.0399141	3.15085	2.97836	2.05106	1.65961	3.84777	0.478862	1.09617	1.20421	2.496	1.45203	1.30075	1.44191	0.615365	0.00519698	0.496566	0.0864184	0.94321	0.980712	1.27406	1.27021
L-Valine, 2TMS derivative	0.00874755	1.14466	0.137592	0.179903	0.589998	1.66077	0.530614	2.21564	2.60054	1.13493	1.89813	0.965337	2.79501	0.604771	2.00988	1.47081	1.36398	0.750945	0.908794	1.05373	1.10505	1.79661	0.70362	0.858902	1.74592	1.34793	1.37624	0.201867	0.5991	0.810123	0.981665	1.12618	0.318519	0.836997	1.4145	1.31253	0.7487	3.37168	1.7361	1.06915	1.81615	1.64387	0.433099	0.864782	0.503001	0.612859	0.765207	1.50072	2.3325
Malic acid, 3TMS derivative	0.0224441	2.34336	4.54955	3.02445	11.4319	6.74778	8.84898	12.6139	11.6541	12.3062	13.0507	5.85136	14.1334	9.86477	10.5646	9.9987	10.4989	7.71248	5.49422	3.25292	7.28199	17.3346	0.284811	3.37114	3.96103	5.574	1.17061	19.6905	1.98205	2.91632	5.33059	3.4528	5.00829	7.14866	2.77619	7.91777	6.02982	10.2274	3.17642	11.5046	8.62877	9.00241	1.80538	9.49945	2.47818	2.1737	3.88871	8.13543	7.59169
m-Cresol, TMS derivative	0.0804761	0.361998	1.05278	0.342676	0.418234	0.262175	1.56824	0.0382462	2.63539	0.611364	0.00483756	1.01946	0.250934	0.871738	0.953214	0.481106	0.476414	1.55909	0.957002	0.479897	1.44864	0.0372478	0.385834	0.322662	0.724723	2.02408	2.00267	0.686607	1.88585	0.80318	0.687558	0.595499	0.25461	0.743474	0.198748	0.793955	3.94842	0.671184	0.958683	0.626432	0.580282	0.27429	0.504767	0.0795631	0.57529	0.500393	0.199693	0.0632763	0.330028
meso-Erythritol, 4TMS derivative	1.49791	0.239055	0.99537	1.04387	1.45541	0.844144	3.34789	0.647585	4.45462	4.72969	1.44251	0.589285	0.804419	2.57363	4.65021	1.06389	2.08441	1.3472	2.69428	0.309039	1.10215	1.96393	8.82893	0.223569	0.163055	1.08781	7.29744	1.96702	1.98382	1.38805	0.825679	0.509617	1.42631	1.25382	1.10507	0.883361	2.51206	1.07628	0.404631	1.1111	0.4203	0.461632	15.9828	0.572626	1.05512	0.502182	0.276811	0.373919	0.307306
Methyl galactoside (1R,2R,3S,4S,5R)-, 4TMS derivative	0.923027	1.02155	1.09727	1.39629	1.13325	1.06083	1.03823	1.04092	1.34585	1.7439	1.14456	1.20263	1.40294	1.39131	1.06664	1.18546	1.03296	1.02366	1.13389	1.12624	1.0499	0.703832	1.12465	0.9331	1.10402	1.33655	0.981857	1.42041	1.45292	1.3902	1.07167	1.42613	1.45622	0.909974	1.07543	1.22834	1.20056	1.35795	1.46832	1.35835	1.43782	1.53669	1.39207	1.36483	0.840964	0.633032	0.483349	0.551582	1.19134
Methyl α-D-glucofuranoside, 4TMS derivative	0.893909	1.13715	1.00801	0.962533	0.224241	1.49156	0.259437	0.77706	2.33649	0.487349	1.1116	1.44238	1.47461	1.18164	1.40694	1.09182	0.728664	0.96552	0.866796	0.804486	0.761365	0.662144	0.676974	0.898289	1.04917	1.25176	1.25351	0.747376	1.60586	0.729977	0.696605	0.906544	1.13127	0.970452	1.07214	1.06328	1.78055	1.06064	1.076	1.35496	1.00044	1.15464	0.881976	0.992094	1.69275	1.07594	0.693592	0.814014	1.01633
Myristic acid, TMS derivative	1.28163	0.850891	0.721505	0.499439	0.698884	0.550262	0.678374	0.506957	0.752731	0.600008	0.726632	0.516228	0.607446	0.395892	0.681003	0.604968	0.65669	0.544174	0.50401	0.588712	0.596711	0.924589	2.06616	0.579202	0.621543	1.56991	0	1.5895	0.696479	0.784128	0.603631	0.838346	1.06226	0.955637	0.715343	0.616599	0.98816	0.840492	0.956388	1.81457	1.47526	1.5588	0.733568	1.41972	1.05306	0.45787	0.6679	0.825808	1.08077
N,N-Diethyl(trimethylsilyl)carbamate	1.15518	1.0746	1.18715	1.13085	2.46191	1.19934	1.16996	1.21002	1.20075	1.20799	1.07	1.09966	1.13142	1.08509	1.07085	1.0616	1.04373	1.06866	1.10224	1.11495	1.09911	1.09829	1.21763	1.11287	1.11356	1.12412	1.14735	1.14042	1.25148	1.26406	1.24395	1.14866	1.23893	1.23868	1.2616	1.2125	1.27357	1.33447	1.30664	1.29499	1.33453	1.30217	1.0864	1.06257	0.177691	0.19717	0.168242	0.175793	0.220931
n-Hexadecanoic acid	0	0	0	0	0	0	0	0	0	0	0	0	0	0	0	0	0	0	0	0	0	0	0	0	0	0	0	0	0	0	0	0	0	0	0	0	0	0	0	0	0	0	0	0	0	0	0	0	0
Nonadecane	1.0143	0.937958	1.15474	1.06026	1.49565	0.958536	1.01395	0.954965	0.992161	0.902889	0.972971	1.03132	0.990771	0.977326	0.992241	1.02435	0.978687	1.06803	1.03497	0.950858	0.99246	0.760453	0.953713	0.961593	0.954813	1.04646	0.983528	0.96828	0.898255	0.96743	0.948788	0.967576	1.06266	1.07111	1.09817	1.04088	1.00507	1.09134	1.16045	1.23305	1.40775	1.16583	0.851669	0.783521	0.536122	0.482899	0.470875	0.485772	0.555006
Nonane, 2,6-dimethyl-	0.302031	1.13995	0.720673	0.657501	1.18262	0.483278	0.715614	0.466068	0.700359	0.565929	0.380288	0.441582	0.574523	0.434164	0.995883	0.64111	0.685592	0.982209	0.494775	0.95956	0.473658	0.608458	1.12681	1.25638	1.10651	0.482682	0.899576	0.630261	0.580924	0.708347	1.04791	1.0711	0.698971	0.989297	0.770944	1.24413	1.12087	1.98946	1.94462	0.789365	0.990693	0.800755	0.885056	0.554648	0.129629	0.0902652	0.265087	0.259774	0.238774
Nonanoic acid, TMS derivative	0.661036	0.877465	0.87377	0.829876	0.96568	1.00111	1.02732	1.07412	1.18369	0.989602	0.970368	0.857936	0.804434	0.851792	0.897401	0.807308	0.828661	1.133	1.11389	0.964881	1.15088	0.966458	1.23295	1.218	1.11492	0.349325	0.611257	0.92832	0.517546	1.31832	1.03238	1.12349	1.10847	1.22076	1.00526	1.12942	1.30163	0.850526	0.761286	0.811618	0.826439	0.874849	0.751313	0.987153	0.308198	0.433659	0.343562	0.377822	0.372606
o-Anisic acid, tridec-2-ynyl ester	0	0	0.0116019	0.0180904	0	0	0	0	0	0.00455862	0	0	0	0.00423447	0.00739591	0.00530468	0	0	0.00570147	0	0.00495702	9.90871	0	0	0	3.41911	5.62329	0	0	0.0142665	0	0	0	0.0052071	0.00925318	0	0	0	0	0	0.0689839	0.0990898	0	0.812028	7.94164	0	0	5.01395	15.4664
Octadecane	3.29017	0	0	2.37974	2.93662	0	3.93089	0	0	0	0	3.73437	0	0	3.75577	2.42175	7.39455	0	3.00614	0	0	0	3.54264	0	0	3.38809	7.45427	3.89042	0	5.15495	0	4.891	0	0	4.87945	5.33816	0	0	0	0	0	0	13.2703	5.94312	17.9788	0	14.2767	13.7324	7.21752
Octadecanoic acid	16.2713	0.755572	16.7157	17.4275	0	0.750443	0.534323	0	0.136327	0	9.15794	0.408755	0.0637792	24.2742	0.119326	0	0	0.825636	35.3955	0	0	219.796	19.5625	0.690409	0	215.963	334.314	186.129	0	0	0	0	0	0	1.09854	0	0	7.13592	0	462.155	374.807	387.041	1061.05	0	790.39	0	296.09	459.528	415.27
Octan-2-yl palmitate	0.347985	0	0	0	1.66946	0.571166	0	2.21741	0	0	0	0	0.639109	0	0	2.85589	0.224395	0.566479	0	0.695687	1.3554	0	0.736744	0.276563	0.827812	0	0.762363	0	0	1.72392	0.28834	0.877165	0.518543	0	0.387835	0.506978	1.84277	1142.83	677.755	0	0	0	0	0.764626	1.83299	3.61812	1.86079	1.25331	0.561799
Octane, 2,3,6,7-tetramethyl-	1.17913	1.08751	0.989121	1.0445	1.07162	1.23121	1.32116	1.21894	1.1058	1.15542	1.09796	1.1748	1.16851	1.189	1.05346	1.33868	1.07105	1.1468	1.19325	1.07859	1.21116	1.09887	0.917248	1.35262	0.992976	1.06902	1.37389	1.47035	1.10851	1.01134	0.971461	0.999549	1.00555	0.944949	1.02649	1.01218	0.939561	1.60644	1.5245	0.855599	1.4116	0.937578	0.659062	0.704815	0.171148	0.259048	0.283023	0.274137	0.340502
Octane, 2,4,6-trimethyl-	1.16333	0.64751	1.28933	1.55233	0.784495	1.40053	1.79492	1.39319	1.54342	1.22871	1.18397	1.36324	1.86896	1.33038	1.37914	1.88517	1.82501	1.21078	1.31098	1.22745	1.29039	1.30335	0.870934	0.897972	1.4904	1.00402	0.961784	0.749583	0.899606	1.88274	1.24259	1.49657	2.04174	1.57764	2.09215	1.37188	1.42041	0.797421	0.876152	1.20332	1.23305	1.11327	1.09022	1.11729	0.0962382	0.304514	0.340358	0.181865	0.10144
Octane, 6-ethyl-2-methyl-	0.684394	0.433019	1.13961	1.551	0.716019	0.642765	1.48542	0.663683	1.33021	0.798951	1.40684	1.34982	1.4929	0.600877	1.38264	0.582634	0.550173	0.685098	0.507478	1.12631	0.493555	0.611155	1.21737	1.43396	1.25908	0.330856	1.48088	1.46132	1.48691	1.01796	1.13614	0.985477	1.11909	0.959363	1.01895	1.02982	1.0951	1.15071	1.1374	0.725492	0.812865	0.812937	0.622704	0.576146	0.181255	0.42672	0.194704	0.199392	0.279566
Octanoic acid, TMS derivative	1.08344	0.992384	1.46631	1.27954	1.36467	1.23971	1.78139	1.23536	1.45886	1.4169	0.975777	0.83264	0.854193	1.20542	0.702681	0.901446	0.730761	1.23046	1.64975	1.38074	1.3488	1.0143	1.99472	1.71673	1.65039	2.41888	1.32574	0.579406	1.19501	1.88142	1.11169	1.58364	1.32242	2.04529	1.41852	1.11665	2.0844	0.896948	0.882768	1.08049	0.971915	1.03467	1.11209	0.963949	0.385927	0.501642	0.304732	0.518491	0.34082
Oleic Acid, (Z)-, TMS derivative	45.0128	0	75.5465	0	0	0	0	0	0	0	8.02389	0	4.92513	13.0755	0	1.84626	6.12408	0	22.1779	2.42993	5.48611	105.633	25.9792	3.09426	2.22669	50.9825	54.405	66.3251	3.56049	3.92425	0	0	0	0	8.24928	0	4.5848	0	1.84797	30.2446	30.5538	31.1149	32.3288	15.3835	18.4715	0	13.9825	14.0794	20.4704
Oxalic acid, 2TMS derivative	0.638141	0.772279	1.67818	4.27664	1.06058	1.44264	0.880817	0.97964	2.32277	1.24238	0.657176	0.784032	1.11045	1.11229	0.915981	1.02611	0.914673	1.06836	0.676237	0.59051	0.774039	1.86084	0.367891	0.741827	0.659338	1.07979	1.89773	1.48047	0.747606	0.828475	0.868137	0.801125	0.735195	0.665493	0.76863	0.905654	0.757102	1.33936	1.02721	2.91895	1.46139	1.55445	8.92039	3.07633	0.20321	0.405644	0.209995	0.773471	2.01364
Oxalic acid, heptyl propyl ester	0.818571	0.798625	0.72895	0.556447	0.751668	0.799413	0.758738	1.9819	0.762493	0.612303	0.638705	0.893004	0.805288	0.795738	0.684758	1.33108	0.758503	1.50773	0.378348	0.643363	1.11404	0.756217	1.14611	1.61576	0.669085	0.479851	2.03989	0.624101	1.37691	0.716524	1.54535	0.713196	0.705444	0.784461	0.796085	1.28295	1.91447	0.692806	0.813883	1.20081	0.600114	0.497897	0.601747	0.69797	1.25425	1.34691	0	0	0.487066
Palmitic Acid, TMS derivative	1.94666	1.24945	1.93556	1.3638	1.66385	1.07741	1.23494	1.14517	1.17433	1.40045	1.67892	0.587845	0.89281	1.20312	1.01209	1.13424	0.903918	1.43468	0.920416	1.02443	1.61165	1.82297	1.62401	1.35348	1.0876	1.41875	1.09161	1.89114	1.43084	1.51787	1.08804	1.45309	1.49878	1.04997	0.921903	0.948029	0.982038	1.01782	0.966665	1.27284	1.42682	1.00065	1.01875	1.31846	1.08828	0.923346	0.880478	1.17807	1.14137
Pentacosane	1.99498	1.75984	1.89877	2.1591	2.23563	1.73579	2.34949	2.77395	2.16654	2.75241	2.15667	2.20068	2.06764	1.76679	2.41067	1.64688	2.1783	1.63664	2.36363	1.72731	1.79515	3.11264	2.3548	1.94772	1.66118	1.97794	2.14035	2.20797	2.01312	1.8961	2.07275	2.03631	1.96199	1.98457	2.00877	1.94989	2.28863	1.95535	2.02095	2.41038	2.41433	3.25769	2.27039	2.15157	2.60818	1.69428	1.29135	1.50777	1.69222
Pentadecane, 2,6,10-trimethyl-	1.3936	1.3407	1.04819	1.24543	0.474952	1.04916	1.05508	1.8728	1.04184	1.30989	1.2748	1.30949	1.30685	1.38638	0.922848	1.26935	1.04867	1.67273	1.31298	1.06297	1.10921	1.21223	1.05627	1.02097	1.05111	1.18067	1.09187	1.08147	1.08023	1.13335	1.35461	1.12063	0.944294	1.8567	0.535622	1.12703	1.12527	1.39462	1.3587	1.30529	1.50638	1.34531	0.806587	0.724604	0.518867	0.516603	0.672516	0.661911	0.647224
Pentadecane, 2-methyl-	1.05254	0.83231	0.995437	1.0011	0.874577	1.00297	1.00883	0.995288	0.99504	1.02081	1.02128	1.01329	1.03586	1.05864	0.989609	1.05045	1.01812	0.824635	0.997435	0.779772	1.04639	1.03586	1.00662	1.02538	0.725135	1.11776	1.02125	1.00897	1.02273	1.05749	0.672081	0.677293	1.01708	0.832091	0.966278	0.732846	0.540115	0.875415	1.13749	0.756693	1.32883	1.11987	0.834235	0.736712	0.595576	0.578336	0.573759	0.448911	0.716075
Pentadecane	0.928796	0.645507	0.922982	0.793065	0.928889	0.930653	0.938482	0.929707	0.932587	0.973661	0.948856	0.952569	0.984495	1.0074	0.979898	1.00198	0.981269	0.973689	0.956666	0.96867	1.01064	1.00239	0.658369	0.743013	0.949466	1.03529	0.950498	0.812874	0.958036	1.01215	0.949636	0.975021	1.02228	1.04195	1.05895	1.00163	0.945406	1.17395	0.92313	1.06482	1.05058	0.771448	0.829163	0.753141	0.591296	0.597329	0.64357	0.626774	0.800488
Pentadecanoic acid, TMS derivative	0.744032	1.22792	1.92358	1.36993	1.38582	1.35025	1.69642	1.64341	1.92312	1.99001	1.10389	1.03621	1.38884	0.923477	1.5091	1.15788	1.27175	1.12232	0.811768	1.40561	0.922078	1.20106	2.07055	1.10991	1.27334	0.895531	0	1.28612	0.91444	0.99438	1.40637	1.25708	1.33586	1.50632	1.22069	1.36	1.57121	1.65813	1.45046	1.15937	1.43891	0.703553	0.454108	1.14072	1.52368	1.02224	1.04297	0.671351	0.991847
Phenylalanine	2.91786	1.88233	0	0.166791	1.25114	1.38012	2.12769	0.961854	2.05728	0.248058	1.24051	2.09512	0.544147	1.83824	0.850311	1.47488	2.25772	1.60461	1.15155	1.77756	2.83697	1.40535	0	1.44147	1.40911	1.87826	0	1.66986	2.03679	1.128	0.954702	1.0021	0.754228	0.903074	2.54465	1.42372	0.291507	0.89618	0.730404	1.05934	1.122	2.37799	0.00401775	1.01083	0.378338	0.23521	0.279871	0.366223	0.476642
Propanedioic acid, 2TMS derivative	0	4.91348	5.17878	8.05883	5.67787	6.27708	0	5.83008	6.92643	6.37957	5.62317	5.37235	6.59116	4.73031	5.56084	6.79715	5.35091	5.50998	5.15013	4.80794	5.53557	7.75375	4.50896	4.08531	5.454	5.23518	8.1081	8.01971	4.50796	4.48162	6.1051	4.16262	4.78939	5.43166	4.54321	4.14152	5.08243	5.39436	4.51202	6.95831	4.81359	5.95277	3.45096	3.07075	1.49045	1.68358	1.83498	1.94279	2.66494
Propylene glycol, 2TMS derivative	0.661547	0.702526	1.01219	0.675017	1.40018	0.976941	0.716803	0.731971	0.703513	0.641999	1.02187	0.593071	1.29641	0.935447	0.537472	1.14847	1.0459	0.907254	2.35787	0.520241	1.22141	11.1701	0.830806	0.605507	0.709946	3.62109	7.56296	7.52066	1.00942	1.09795	0.611149	0.719339	0.744816	0.791492	1.00561	0.708583	1.0409	2.04362	1.90275	2.84468	2.88465	0.259356	4.38474	3.79264	0.25472	0.139996	0.123757	0.401979	0.232914
p-Toluic acid, TMS derivative	4.73364	10.9077	9.16288	36.0553	6.09751	9.22853	5.90656	7.16462	7.5678	11.6091	7.53673	8.85094	7.81574	11.4191	6.69657	10.6911	8.78701	10.6519	7.1101	8.36154	6.94979	6.50186	34.4882	10.0415	31.8123	6.69876	8.57235	6.71204	3.30164	8.73316	8.19095	5.96772	4.61374	6.65697	5.85955	7.41931	5.96848	5.94369	7.46002	7.62029	10.4385	6.66417	4.79895	13.0397	2.66398	2.15174	2.29512	3.64019	4.72118
Pyroglutamic acid, TMS derivative	0	904.344	6526.62	0	73.9551	38.3613	60.9084	685.117	0	303.71	7.29797	0	0	0	0	26.4952	0	0	927.372	0	0	118.535	1015.69	0	0	1.32521	0	0	0	236.568	4.04847	0	2.60161	0	33.6018	1.33008	124.164	8.31307	0	0.423519	0	0	0	3.41432	0.794168	0.562744	0.387077	0.684088	2.57955
Ribitol, 5TMS derivative	1.77413	4.19791	0.73452	0.753248	2.76033	0.754948	1.27485	0.440669	1.63936	7.02459	0.22677	0.352268	0.347339	0.320873	4.02848	0.238074	0.473362	0.261557	0.235631	0.264464	3.80547	1.1429	16.5561	0.214176	0.734825	4.48094	14.0709	1.83627	0.456626	0.62332	0.504039	0.393432	1.29379	0.652455	0.864172	6.33768	11.3564	6.4079	2.8785	0.529862	0.185508	0.439068	2.25495	0.582335	14.8843	0.488306	0.31112	0.0889824	0.972631
Ribonic acid, 2,3,4,5-tetrakis-O-(trimethylsilyl)-, trimethylsilyl ester	3.89354	0.469038	1.18333	1.09705	2.33341	0	3.38843	0.946669	4.16444	3.13114	0.981335	0.677496	1.02907	2.24916	0	0.501569	0	1.5462	1.8537	0	0.590189	13.3315	30.6458	0	3.08436	0	3.62729	31.095	0	0	1.43217	0	0.314153	0	0.32463	1.20757	1.65438	0.663146	0.533844	0.649857	1.75535	2.15227	4.81482	12.7117	1.9115	0.408054	0.785444	1.10352	0.492198
Stearic acid, TMS derivative	1.33878	1.92397	1.78793	1.58329	1.60742	1.4768	1.0901	1.58917	1.50545	1.52305	1.54732	1.39545	1.41023	1.33764	1.23395	1.36987	1.27207	1.30501	1.2435	1.10571	1.13712	1.19282	1.50245	1.13537	1.195	1.09075	0.512802	1.40373	1.45392	1.2729	1.22235	1.19214	1.21463	1.16836	1.11371	1.08762	1.14887	1.22951	1.1478	1.16267	1.35556	1.10928	0.593525	0.76511	0.498869	0.764427	0.75672	0.616399	0.883881
Supraene	0.864995	0.929378	1.04029	1.08171	1.36906	0.99625	1.11595	1.11574	0.949181	0.909811	1.16491	0.946125	1.12438	0.981234	1.51733	0.999979	2.90024	0.983494	1.09515	1.25236	1.24625	4.7238	1.67263	1.00826	1.23236	1.88058	4.81992	2.12312	0.767478	1.19203	1.03698	0.943565	1.76728	1.69539	1.79035	1.09829	1.60219	0.912856	1.06294	1.16413	1.09507	1.51828	2.19623	1.63902	3.95569	0.501678	1.14127	1.66005	1.4892
Tetradecane, 4-methyl-	1.12326	1.08088	1.10309	1.13375	0.851353	1.20713	1.20854	1.25554	1.21841	1.31185	1.2061	1.20678	1.28961	1.33678	0.890429	1.3071	1.27914	1.28127	1.25388	0.88838	1.30919	0.903898	0.740968	0.803157	1.2677	0.957835	1.17883	0.820694	0.853398	0.909407	1.33649	0.974813	1.32114	0.992682	1.01253	1.41216	1.01427	1.21321	1.49608	1.53925	1.77212	1.36823	0.917627	0.792976	0.453541	0.452109	0.508606	0.47659	0.643499
Tetradecane,	0.982354	1.02638	0.98365	0.978074	0.996923	1.18243	1.17218	1.08338	1.21926	1.11471	0.981327	1.13257	1.0364	1.17172	1.03112	1.06892	1.03212	1.0871	1.03088	1.09828	1.04036	1.00686	1.16638	1.15466	1.13274	1.11665	0.990745	0.988413	0.942443	1.12041	1.19138	1.04779	1.08761	1.20478	1.16237	1.27831	1.25164	1.2375	1.21885	1.19661	1.34991	1.20975	1.0909	0.900591	0.441409	0.429263	0.493724	0.490785	0.638743
Tetrahydrogeranyl formate	1.00512	0.920064	0.948319	0.950693	0.991924	1.06237	1.01942	1.03049	1.03099	1.06456	0.944498	0.997376	1.04006	1.12066	1.01216	1.05324	1.03885	1.04464	1.04157	0.919138	1.09934	1.09155	0.916115	0.84303	0.986969	1.03911	0.885054	0.984071	0.94959	0.995529	0.968861	1.01708	1.06386	1.00631	1.01466	0.949954	0.99604	1.12049	1.04319	1.05842	1.10056	1.07642	0.891702	0.7928	0.208361	0.267763	0.239444	0.217437	0.289944
trans-13-Octadecenoic acid	31.9067	0	42.5909	0	0	4.32659	4.43936	0	5.87061	0	0	0	0	27.2244	0	4.50673	0	0	17.2599	0	0	899.406	54.2113	0	0	287.977	299.783	79.2897	0	0	2.51273	3.18361	0	0	0	3.89561	0	0	0	117.469	57.4317	116.568	294.637	0	79.3294	0	33.7531	72.579	29.1067
Tridecane	0.681925	0.719813	1.0754	0.739042	0.807899	1.14517	0.975386	0.831905	0.91033	0.864443	0.834416	0.742024	0.936235	0.744803	0.748763	0.748885	0.715021	0.725575	0.666382	0.628927	0.7268	0.606984	0.977772	0.585266	0.667996	1.24375	1.0264	1.12839	0.759811	0.674507	0.65174	0.668594	0.685181	0.751295	0.783718	0.768428	0.77583	1.09887	1.2686	1.12224	0.887517	0.77202	0.916876	0.865786	0.577161	0.563719	0.412516	0.400589	0.88161
Tridecanoic acid, TMS derivative	0.711509	0.879796	0.892108	0.90676	0.866536	1.02699	0.959248	0.943079	0.960098	0.984709	0.811528	0.916411	0.902469	0.856151	0.929187	0.937555	0.927868	0.838733	0.853195	0.988153	0.821966	0.723704	0.690321	0.950641	1.06372	0.794242	1.011	0.365331	0.717924	0.9258	1.05812	1.11837	1.09421	1.01351	1.10934	1.10318	0.887083	1.08291	1.09458	0.958011	0.883853	0.883399	0.855828	0.826871	0.495337	0.585162	0.390241	0.390428	0.559142
Triethanolamine, 3TMS derivative	1.40333	1.2688	0.967867	1.95247	0.809087	2.25384	2.50693	1.94155	2.50956	1.43027	0.952541	1.00124	1.07927	1.10342	0.640465	0.913247	0.510676	1.49739	2.07805	1.19358	1.32415	1.21746	1.92324	1.84532	2.03329	1.12701	1.25154	1.42402	1.36642	1.81511	1.35358	1.71463	0.684752	1.69819	0.315029	0.930503	1.62522	1.29107	0.62766	1.4926	1.04972	1.35471	0.425689	0.398506	1.97887	1.99114	1.47411	1.34986	1.22488
Triethylene glycol, 2TMS derivative	0.279453	1.55084	0.219793	0.462675	0.255854	4.33406	4.21959	1.67126	1.49993	4.42425	4.68365	1.39866	5.4678	3.49903	4.85656	6.58359	4.0869	3.19441	1.44435	1.97579	1.4502	0.190693	0	0.901033	2.15762	0.322119	0.11916	0.685308	0	2.17975	2.16332	2.03228	2.08439	1.44318	1.4549	2.75159	1.13941	4.5825	1.54186	4.04332	5.26947	3.17062	0.260379	1.41728	0.181697	0.522462	0.322035	0.674494	5.63297
Trimethylolpropane, 3TMS derivative	0.738931	0.753741	0.901241	0.725674	0.76243	0.788637	0.846504	0.994823	0.940513	1.06903	1.26742	1.03031	0.815674	0.846708	1.13899	1.21707	0.974913	0.829824	0.986252	1.04541	1.20579	0.91843	1.00021	1.05919	0.960505	0.616091	0.710567	0.650567	0.631541	1.39006	1.03643	1.56207	0.915472	1.04343	0.973622	1.14235	1.4247	0.89308	0.802077	0.723627	0.661827	0.816241	0.725381	0.547579	0.172477	0.164771	0.167257	0.157398	0.167944
Tripropylene glycol monomethyl ether, TMS derivative	1.35106	1.05378	1.54193	1.15565	1.63631	1.24427	1.32169	1.21885	1.39663	1.52819	0.679941	0.776193	0.865352	0.831618	0.792774	0.907271	0.73924	1.09829	1.31733	1.42273	1.53749	13.2275	1.64359	1.3372	1.49211	10.5767	1.32823	0.526911	1.15569	3.30586	1.43075	2.20217	1.41876	1.37561	1.67451	1.49808	3.6381	1.10013	0.961801	0.798048	1.15845	4.10386	0.926379	0.853288	0.766868	0.695262	0.7856	0.928938	2.60944
Trisaminol, 3-OTMS	0.826719	0.815099	1.63014	1.77973	2.59073	1.29992	3.23777	1.63893	2.21922	2.86912	1.64756	1.08313	1.63237	1.55393	2.40435	1.33378	1.43006	1.3678	2.52854	0.944719	1.28451	2.55598	3.52762	1.34572	0.898503	1.25713	4.17298	2.95987	1.84888	3.36439	2.01687	1.07834	2.74617	8.61164	1.7131	1.73437	2.60174	1.89082	1.76073	3.06379	1.73703	7.08626	10.3692	1.23183	1.27335	0.452607	0.520651	0.986875	0.706198
Tyrosine, 2TMS derivative	1.38652	2.16557	3.99184	2.51781	2.62736	1.39174	1.46245	2.56686	1.72084	1.2863	3.57988	1.78132	2.58563	1.93411	2.40738	1.93897	2.12056	2.30188	2.19649	1.79774	2.13388	0.053904	1.7942	1.06765	1.52871	0	0	0.648173	1.58642	1.94855	1.45484	1.04696	1.39823	1.28187	1.03608	0.994558	0.880672	1.77602	1.49649	0.856192	1.06333	0.850808	0	0.339327	0.0592455	0.739496	0.278474	0.20118	0.442876
Undecane, 3,7-dimethyl-	0.613891	0.950883	0.950709	0.774691	0.805843	0.818862	1.07445	1.08922	0.664494	0.994051	1.12449	0.672336	0.868633	0.704993	0.84936	0.857282	0.841296	1.01781	0.699474	0.628951	0.88945	0.607591	0.837522	0.740878	0.628546	0.895909	0.696734	0.636608	0.829284	0.711467	0.660433	0.69123	0.873996	0.761995	0.753239	0.911764	0.790909	1.27916	1.23922	1.19774	1.08278	0.832445	0.479512	0.678256	0.323621	0.409759	0.526939	0.309089	0.627552
Undecane, 4-methyl-	0.969244	0.908643	0.891582	0.925673	0.962663	1.01049	0.996217	1.01571	1.0148	1.06887	0.988034	1.00299	1.04627	1.08193	1.01727	1.04779	1.02025	1.02266	0.743192	0.910132	1.08341	1.05591	0.898982	0.85286	0.99005	0.914883	0.922757	0.866922	0.858978	1.00721	0.984851	1.01165	1.01557	1.00155	1.0129	1.02333	1.00417	1.07885	1.08609	1.08462	1.18746	1.05299	0.975131	0.909689	0.398102	0.789482	0.42549	0.421307	0.783601
Undecane	0.826256	1.25727	0.618885	0.852672	1.27542	0.857046	0.846258	0.938	0.775346	0.902261	0.856408	0.8303	0.927784	0.879949	0.876696	0.870524	0.860167	0.792271	0.828568	0.749257	0.864089	0.799968	0.832407	0.989352	0.876464	1.19745	1.06742	1.06237	1.09022	0.752732	0.847252	0.741115	0.848709	0.733718	0.785876	0.800974	0.858971	1.08938	1.07869	0.689292	0.773734	0.775254	0.612827	0.566759	0.178347	0.419914	0.191608	0.196223	0.275071
Urea, 2TMS derivative	0.857635	0.701368	1.46474	0.900983	0.381616	0.175047	0.487205	0	0	0	0.662784	0.971697	0.82845	0.990669	1.10918	0.872646	0.636956	0.854627	1.19992	0.946914	1.02278	0	0	1.30812	1.0607	0.976879	0	0.849062	0.848181	0	0.897329	1.09468	0.978514	0.344086	0.991985	0.952697	0.496059	0.842766	0.518246	0	0.746468	0.878586	0	1.00785	0	0.657822	0.775541	0	0
Valproic acid, TMS	3.49327	0.452462	13.9521	14.9192	0.587751	3.71778	1.20389	1.25425	3.94365	1.54253	3.06135	3.16985	0.774728	2.00122	2.9164	6.67348	1.03355	4.08723	5.05983	0.888303	4.369	10.2845	1.88398	0.809237	0.736774	1.45882	8.03923	0.830599	0.41619	3.73283	2.12821	0.456666	0.607827	3.47248	0.713339	0.88276	1.4154	1.63819	0.162592	1.02703	1.16702	0.903556	5.93913	1.06133	0	0	0	0	0
Xylitol, 5TMS derivative	0.782367	0.630584	1.82585	3.09127	14.5487	0.994671	1.21282	0.470628	1.89956	2.0322	0.523246	0.606785	0.726016	0.744049	1.3134	0.605292	0.68827	0.304724	0.641929	0.469062	0.752475	3.12527	1.2933	0.393773	0.639308	0.349368	1.53396	1.5636	0.443703	1.6557	1.42454	0.714746	1.40485	1.46011	6.29197	1.01022	2.23538	1.23169	1.1782	1.09946	0.277847	0.559573	1.45955	0.486203	0.358676	0.162516	0.111159	0.235118	0.229823
Histidine	0.301484	5.20673	0.571331	1.20634	0.34796	1.67874	0.423249	0.830598	1.79809	0.859818	0	0.433324	0.98226	0.492048	0.951338	0.429194	0.367401	0.326875	0.942711	0.495541	0.830169	2.59401	1.78733	0.393048	0.449576	0.483275	0.0829116	0.536398	0.27313	0.962298	0.300736	0.199147	0.41044	19.194	0.899931	0.48012	0.505599	0.604237	1.02678	0.730115	0.586202	0.743039	0.154375	3.19282	0.467039	1.20194	1.54764	4.12125	1.66598
Hypoxanthine	0	4.17477	0.00692796	0	0	1.31435	1.14835	0.284516	0	0.580324	0	0.215026	1.95228	0.0195412	0.0154716	0	0.042221	0.956548	1.12406	0.00508594	0	0.000612203	0	0.0345019	0	0.00128302	0	0.00147711	0.00636032	0.367619	1.97115	0	0	0.332517	0.00230393	0	0.617244	0.013858	0	0	0.00207723	0	0.00446891	0	0	0.236921	0.086358	0	0
Purine	0.00119857	0.100499	0.0035472	0.0514622	0.00464715	0.768193	0.260597	0.10239	0.47182	0.839653	0.00196989	0	0.101681	0.000571584	0.00559373	0.305308	0.038179	0.014891	0	0.00750871	0.00225993	0.00709256	0.00482735	0.0526352	0.00517184	0	0	0.00204203	0.0021702	0.00266507	0.155399	0.110565	0.00830567	0.121735	0	0.272389	1.03771	0.00396336	0.00375507	0	0	0.00460401	0	0.0071124	0	0.00867083	0	0	0
Citramalic acid	0	7.10907	0.961337	0.578013	0.940367	1.8264	0	0	0.84383	0.890208	0.852875	0.805579	1.09433	0.926123	0.839074	0.892351	0.782858	1.27856	0.422714	1.19635	0.646785	0.699495	0.0406253	0.66166	0.874675	0.654273	0.465732	0.82116	0.278537	0.656635	0.676368	0.60308	0.788957	15.7475	0.764623	1.40455	0.285171	0.733145	0.367683	0.561052	0.621373	0.547058	0.101006	2.3494	0.841786	0.713629	1.27194	1.96715	1.52758
Phenylalanine, di-TMS	0	0	0	0	0	0	0	0.213571	0	0	0	0	0	0	0	0	0.0200853	0.0509773	0.00329202	0	0	0	0	0	0	0	0	0	0	0.0694474	0	0	0.211838	0	0	0	0.0269335	0	0	0	0	0	0.00991174	0	0	0.188309	0.29138	0.313854	0
Ephedrine	1.63402	55.9323	0	5.80945	3.34528	21.6995	7.64752	8.66874	8.73001	5.05543	5.13214	9.96986	8.9639	3.31438	7.75815	7.94648	10.1822	6.7254	8.4547	18.8076	4.88336	0	4.05705	16.3878	16.8767	0	0	0	7.15193	13.2626	15.2023	15.9925	19.9982	397.606	20.3713	30.8815	13.5689	8.93361	9.50918	1.8289	3.30413	1.37012	0.109283	0	0	14.8231	9.99462	2.2963	4.7312
Ethanolamine	0	0.0117485	0	0	0.000287057	0.00218796	0.00346156	0	0	0.00136528	0	0.00056604	0.00081161	0.000812522	0	0	0	0	0	0	0	0	0	0	0	0	0	0.00235294	0.00248963	0	0.00154098	0.00129794	0.000396725	0	0.00260863	0.00261296	0.0105558	0.00808492	0.00192589	0.00656205	0.00322709	0.00164495	0	0	0	0	0	0	0
Glycine	0.24998	0	0	0	0	0	0	0	0	0	0	0	0	0	0	0.16247	0.231081	0.177376	0.397858	0.194343	0.0651539	0.0649155	0.21671	0.173433	0.130721	0.0554121	0.0887142	0.0829219	0.351306	0.17057	0	0.085308	0.171846	3.06613	0	0	0.0646681	0	0	0.0844632	0	0.105638	0.109616	0.21904	0	0.287072	0	0	0
Isonicotinic Acid	0.0452255	0.724837	0.0566977	0.0543986	0.0510316	0.111346	0.0579065	0.0759228	0.0619526	0.0518251	0.0473594	0.0547217	0.0673124	0.0440899	0.0568869	0.109969	0.048869	0.18752	0.0643825	0.133443	0.150529	0.0461539	0.087936	0.162118	0.0830716	0.101044	0.0768405	0.0348558	0.0684418	0.0671669	0.0614197	0.0684939	0.106094	2.10849	0.0980514	0.159552	0.0839465	0.0882903	0.0775482	0.0629628	0.0768719	0.0923664	0.0988938	0.284775	0.144569	0.137814	0.161374	0.136099	0.0936618
Glutamic acid	0	4.24587	0	0	3.59816	0.620012	0	10.4232	1.29812	2.63896	9.23871	0.860985	14.5674	4.03253	6.03996	9.29546	1.34815	3.61955	0	0.140602	0.73591	0	0	0.35317	0.0755697	1.67215	0	7.36152	0	0	0.867729	0.194541	0.275066	0	0	0.921528	0	3.37007	2.7236	5.4584	6.28499	3.14751	0.0255222	2.6135	0	7.42099	29.8231	17.6062	13.1342
Glutamine	1.3248	15.1593	0.834101	0.263694	1.30158	1.72589	1.52798	0	1.58843	0.418984	1.86675	4.05181	1.22117	1.81785	0.241629	7.2457	1.82515	6.98818	0.00185902	1.55264	4.44342	4.34342	0.0997151	2.39966	0.321677	4.82744	2.31299	4.82133	5.32008	0.144035	0.778601	0.0514196	0.339945	0	1.29709	2.64392	0.360258	0.754557	0	1.81709	1.16133	2.5862	0.0236874	9.78501	0.1674	0.187786	0.488004	0	0.367132
Proline	0	4.13298	0.00417194	0	0.971491	1.20699	0.0279563	0.51734	0.0598643	0.656139	0	0.0594737	0.937957	0.241536	0.434254	0.300167	0.428438	0.118373	0.00102431	0.133288	0.0310986	0	0	0.0237485	0.103386	0.0108802	0	0.0531531	0.00181654	0.000823821	0.107918	0	0.185712	0.0917839	0.125697	0.130979	0	0.320476	0.249056	0.186516	0.447546	0.133043	0	0.0788849	0	0.0432494	0.143856	0.12203	0.489902
Tryptophan	0	192.679	8.81358	11.4903	3.47859	21.1127	3.9599	11.8642	8.72895	8.3952	2.75488	8.43415	13.0542	0.725297	14.0245	10.9439	10.7866	9.02321	2.39493	25.5385	2.41562	0	1.26446	11.1732	13.1351	0	0	0	8.50403	9.63296	11.9189	10.4617	3.61686	179.394	16.1991	22.6766	2.3222	9.39323	7.35696	0	0.0538428	0.0178411	0	0.060917	0	29.9014	0.127576	0	0.11242
Malic acid	0	0.203506	0.0327874	0	0.0925397	0.0665173	0.0533891	0.0735688	0.0703251	0.0647235	0.0540961	0.0385998	0.026201	0.0520611	0	0.0432764	0.0513052	0.0493127	0.0194979	0.024362	0.0370111	0.105314	0	0.020137	0.025027	0.0365858	0	0.127227	0.00827051	0.0148988	0.0269481	0.0158116	0.0304319	0.917493	0.0160495	0.086604	0.0194108	0.0433755	0.0102762	0	0.027134	0.0395912	0.00338198	0.140538	0.0248599	0.0217435	0.0509287	0.104568	0.0489173
Metanephrine	0	0	0	0	0	0	0	0	0	0	0	0	0	0	0.189997	0.0125383	0.0235872	1.19478	0.622896	0	0.740964	0.721109	1.88869	0	0	0	0.102445	0.709106	1.07775	0.398919	0	0	0	22.4952	0	0	0.728924	0	0	0	0	0	0.0887917	2.72423	0.906001	3.00672	2.06209	1.48594	1.97518
N-Acetyl-L-alanine	0.128811	1.07105	0.158483	0.14609	0.10211	0.273266	0.207153	0.0822771	0.234521	0.135566	0.0951934	0.0951848	0.123897	0.0928129	0.135078	0.106761	0.0939125	0.147748	0.175043	0.117882	0.0952296	0.119562	0.199791	0.0992223	0.0728006	0.129978	0.363248	0.138764	0.125024	0.138207	0.129697	0.0901019	0.1371	1.93811	0.170344	0.24066	0.164558	0.13445	0.082405	0.13477	0.0747223	0.0907919	0.101433	0.369807	0.265376	0.107389	0.157664	0.222824	0.136006
N-Isobutyrylglycine	0	0	0	0	0	0	0	0	0	0	0	0	7.1126	0	0	14.1566	9.39455	20.6298	23.8955	0	0	0	1.47956	0.944287	0	0	0	0	0	0	3.04104	0	0	0	5.67369	0	0	0	0	0.205978	0	0	0.375712	16.7943	0	0	0	0	0
[truncated: 108 more columns]

## Sheet: Modulated COVID-19 vs Healthy
Modulated molecules in COVID-19 patients respect to healthy subjects (fold change >1.3 and p-value<0.05)
	FC	p.value
Phenylalanine, di-TMS	0.03447	1.9077e-12
D--Talofuranose, pentakistrimethylsilyl ether isomer 2	2.2547	4.0869e-11
Hexadecanamide	9.0194	4.779e-11
2,4-Di-tert-butylphenol	2.8621	2.2615e-09
N-Isobutyrylglycine	0.374	1.0609e-08
2,5-di-tert-Butyl-1,4-benzoquinone	12.587	6.4819e-08
Caffeine	0.3538	2.7697e-07
2-Hydroxy-3-methylbutyric acid, 2TMS derivative	10.181	2.1502e-06
Dodecane, 4,6-dimethyl-	14.681	2.7495e-06
Butanoic acid, 3,4-bistrimethylsilyloxy-, trimethylsilyl ester	5.3122	5.5171e-06
Octadecanoic acid	14.464	1.0199e-05
2-Pyrrolidinone, 5-cyclohexylmethyl-	3.8237	1.1458e-05
1-2,5-Dimethoxyphenyl-1-trimethylsilyloxypropan-2-amine	1.6003	1.2996e-05
Azetidine, 1-acetyl-2-methyl-	3.2825	1.8644e-05
Hexadecanoic acid, 4-trimethylsilyloxybutyl ester	2.2342	3.201e-05
Ribonic acid, 2,3,4,5-tetrakis-O-trimethylsilyl-, trimethylsilyl ester	5.8164	4.943e-05
D--Ribono-1,4-lactone R,S,R-, 3TMS derivative	2.9101	0.00013676
3-Hydroxyisovaleric acid, 2TMS derivative	4.7739	0.00014553
L-Pyroglutamic acid	3.8543	0.00018367
Tryptophan	3.5285	0.00021033
2,3,4-Trihydroxybutyric acid tetrakistrimethylsilyl deriv;, , R,R-	0.55568	0.00031315
Z-Docos-9-enenitrile	4.393	0.00031585
Glutamine	9.23	0.00040056
D--Arabitol, 5TMS derivative	3.4781	0.0004289
trans-13-Octadecenoic acid	4.7536	0.00050762
3,5-di-tert-Butyl-4-hydroxyacetophenone	61.972	0.00052553
2-Hydroxybutyric acid, 2TMS derivative	4.9219	0.00061553
1-Deoxypentitol, 4TMS derivative	52.124	0.00067885
Glycerol, 3TMS derivative	2.8447	0.00070246
Heptadecanoic acid, TMS derivative	1.3206	0.00070815
Trisaminol, 3-OTMS	2.8573	0.00080075
R,S-2,3-Dihydroxybutanoic acid, tristrimethylsilyl deriv;	4.2834	0.001462
Lactic Acid, 2TMS derivative	9.5992	0.002134
Purine	1.835	0.0024852
4-Hydroxybutanoic acid, 2TMS derivative	3.3121	0.0030494
Glutamic acid	94.611	0.0031345
2,5-Dimethoxyphenol, TMS	3.2044	0.0031715
Erythrono-1,4-lactone, E-, 2TMS derivative	0.47396	0.0035686
Alanine, N-methyl-N-methoxycarbonyl-, undecyl ester	2.4615	0.0038251
Cyclohexane, undecyl-	0.60699	0.0044592
2-Ethyl-3-hydroxypropionic acid, di-TMS	3.357	0.0044649
1-Monopalmitin, 2TMS derivative	0.54286	0.0046954
Hexadecane, 2,6,10,14-tetramethyl-	1.3244	0.0050567
3-Hydroxybutyric acid, 2TMS derivative	6.2707	0.0054035
Ephedrine	4.798	0.0055533
Heptacosane	2.0481	0.0061105
2-Butenedioic acid, E-, 2TMS derivative	0.72343	0.0071041
L-Threitol, 4TMS derivative	5.1664	0.0091253
meso-Erythritol, 4TMS derivative	5.1664	0.0091253
Palmitic Acid, TMS derivative	2.7614	0.0092934
L-Valine, 2TMS derivative	0.75057	0.0093234
beta-D--Xylopyranose, 4TMS derivative	2.2402	0.010421
p-Toluic acid, TMS derivative	3.7269	0.010649
1,2-Cyclohexanedicarboxylic acid, nonyl 4-octyl ester	1.4776	0.011376
Triethanolamine, 3TMS derivative	3.005	0.012704
Arachidonic acid, TMS derivative	2.9883	0.013263
9-Octadecenoic acid, E-, TMS derivative	2.7055	0.015872
D---Lactic acid, trimethylsilyl ether	2.2646	0.015888
Undecane, 4-methyl-	0.69684	0.017359
Cycloheptane, bromo-	4.2772	0.021998
Oleic Acid, Z-, TMS derivative	1.6074	0.023926
3,4-Dimethoxymandelic acid, di-TMS	1.7781	0.024369
Butanedioic acid, 2TMS derivative	3.077	0.024565
Hexadecane, 2-methyl-	3.8187	0.025766
1,4-Benzenedicarboxylic acid, dimethyl ester	3.8634	0.027448
Propylene glycol, 2TMS derivative	3.2803	0.029804
1,5-Anhydroglucitol, 4TMS derivative	1.4106	0.030383
Nonanoic acid, TMS derivative	1.839	0.031903
Valproic acid, TMS	2.9693	0.032408
2-Hydroxy-4-methoxybenzaldehyde, TMS derivative	1.4624	0.033208
2,5-Cyclohexadiene-1,4-dione, 2,6-bis1,1-dimethylethyl-	2.8929	0.034035
Pentadecane	2.4105	0.037963
cis-4,5-Dihydroxy-o-dithiane, 2O-TMS	3.6044	0.041879
L-Isoleucine, TMS derivative	3.9377	0.044046
Urea, 2TMS derivative	2.1058	0.045941

## Sheet: Modulated ICU COVID-19 vs ICU
Modulated molecules in ICU COVID-19 patients respect to healthy subjects (fold change >1.3 and p-value<0.05)
	FC	p.value
11-Octadecenoic acid, E-, TMS derivative	5.1467e-08	2.7462e-05
Glycine	0.031249	5.4158e-05
Formamide, N,N-diethyl-	0.19835	0.00161
Proline	12.523	0.0019569
1-Phenyl-1,2-ethanediol, 2TMS derivative	0.22465	0.0066391
Tetradecane,	0.27266	0.0067398
4-Methylcyclohexylamine	0.24436	0.007424
Glutamic acid	53.733	0.0077431
Octadecanoic acid	0.32982	0.0080381
1-2,5-Dimethoxyphenyl-1-trimethylsilyloxypropan-2-amine	4235.6	0.0081988
Valproic acid, TMS	0.20694	0.0096219
beta-D-Galactofuranose, 1,2,3,5,6-pentakis-O-trimethylsilyl-	0.26698	0.0097609
Citric acid, 4TMS derivative	3.8308	0.011733
Nonane, 2,6-dimethyl-	0.25882	0.01228
2-Hydroxy-4-methoxybenzaldehyde, TMS derivative	2.1329	0.016667
alpha-Tocopherol, TMS derivative	0.31246	0.019896
1,2-Ethenediol, 2TMS derivative	0.13363	0.020058
Glutamine	1.7653	0.020349
2,5-di-tert-Butyl-1,4-benzoquinone	0.39213	0.020975
2-Butenedioic acid, E-, 2TMS derivative	0.64258	0.024089
Benzene, 3-cyclohexen-1-yl-	0.26619	0.024627
Cycloheptane, bromo-	0.23785	0.027315
Heptadecanoic acid, TMS derivative	27.778	0.031703
Undecane, 4-methyl-	0.19412	0.032606
Pentadecane	0.30896	0.03291
3,5-di-tert-Butyl-4-hydroxyacetophenone	0.15097	0.03627
L-Alanine, 2TMS derivative	0.2099	0.040385
Biphenyl	0.22087	0.042581
beta-D--Xylopyranose, 4TMS derivative	0.38954	0.046965
6,8-Dioxapentadecane	0.55727	0.047311
2,2'-Bipyridine	0.33516	0.047313
Octan-2-yl palmitate	13.471	0.048541

## Sheet: Mod. COVID-19 vs ICU COVID-19
Modulated molecules in COVID-19 patients respect to ICU COVID-19 patients (fold change >1.3 and p-value<0.05)
	FC	p.value
Phenylalanine, di-TMS	0.36386	6.34e-11
Benzene, 1-butylheptyl-	1.7473	4.33e-09
N-Isobutyrylglycine	0.61741	3.28e-08
Proline	57.553	1.16e-06
2,3,4-Trihydroxybutyric acid tetrakistrimethylsilyl deriv;, , R,R-	4.223	1.36e-06
Heptadecanoic acid, TMS derivative	112.44	1.84e-06
1-2,5-Dimethoxyphenyl-1-trimethylsilyloxypropan-2-amine	387000000000	1.34e-05
DL-Phenylalanine, TMS derivative	40.566	5.55e-05
Glycine	0.50235	9.31e-05
Benzene, 1-methyldodecyl-	34.83	0.00015162
Citric acid, 4TMS derivative	15.248	0.00016536
L-5-Oxoproline, , 2TMS derivative	3.5038	0.00019951
2-Aminomalonic acid, N,O,O,-TMS	4.1547	0.00024238
L-Pyroglutamic acid	4.0658	0.00026399
3,5-di-tert-Butyl-4-hydroxyacetophenone	0.25541	0.00032962
Cyclohexane, undecyl-	19.611	0.00036524
Tyrosine, 2TMS derivative	11.532	0.00056258
Alanine, N-methyl-N-methoxycarbonyl-, undecyl ester	9.6009	0.00062701
Glutamic acid	100.03	0.00099597
Octan-2-yl palmitate	31.964	0.0017541
Dodecanoic acid, TMS derivative	2.5064	0.0021378
Octadecanoic acid	0.63675	0.0026292
Tridecanoic acid, TMS derivative	2.8043	0.0034935
Hexadecane, 2-methyl-	0.38429	0.0049851
Benzaldehyde, 2,5-dimethoxy-	3.6712	0.0065283
dl--Tocopherol	0.45077	0.0066683
Metanephrine	4.9574	0.0073387
Hexadecane, 2,6,10,14-tetramethyl-	2.3648	0.0095675
Malic acid, 3TMS derivative	3.2811	0.010675
Benzene, 1-methyldecyl-	2.2943	0.011906
Glycerol, 3TMS derivative	0.73725	0.012903
D---Citramalic acid, 3TMS derivative	2.1877	0.017686
10-Heptadecenoic acid, Z-, TMS derivative	5.6898	0.0178
Cycloheptane, bromo-	0.66694	0.019874
Triethylene glycol, 2TMS derivative	6.8374	0.023945
Histidine	6.9397	0.024638
Dopamine, N,N-dimethyl-, dimethyl ether	7.8922	0.027488
Purine	66.239	0.028976
L-Serine, 2TMS derivative	0.59892	0.029481
1,2-Cyclohexanedicarboxylic acid, nonyl 4-octyl ester	3.5487	0.032077
Caffeine	4.593	0.036573
L--Lactic acid, trimethylsilyl ether	2.3589	0.037776
Oleic Acid, Z-, TMS derivative	0.68457	0.037826
Decanoic acid, TMS derivative	0.49861	0.040718
11-Octadecenoic acid, E-, TMS derivative	4131.1	0.042923
Methyl -D-glucofuranoside, 4TMS derivative	2.4954	0.046482
