# Supplementary material for: Large-Scale Plasma Analysis Revealed New Mechanisms and Molecules Associated with the Host Response to SARS-CoV-2
Source: Int J Mol Sci. 2020 Nov 16;21(22):8623. doi: 10.3390/ijms21228623 (PMC7696386; doi:10.3390/ijms21228623)
Supplement: Supplementary file 1 [file ijms-21-08623-s001.zip › table S4.xlsx]

## Sheet: Foglio1
RSDs of selected molecules in QC samples
Molecules	RSDs
1,5-Anhydroglucitol	13.79
1-Monopalmitin	29.84
2-Hydroxybutyric acid	29.05
2-Monostearin	28.07
Arabinitol	26.82
beta-D-(+)-Talopyranose	16.47
beta-D-Allopyranose	12.51
Cholesterol	18.27
Decanoic acid	26.32
D-Glucose	14.24
Glucopyranose	14.22
Glycerol monostearate	27.33
Glycerol	25.86
Heptadecanoic acid	28.21
Lactic acid	19.52
L-Threitol	25.94
Methyl alpha-D-glucofuranoside	13.33
Myristic acid	19.83
Nonanoic acid	27.63
Pentadecane, 2-methyl	11.23
Pentadecane	8.39
Ribitol	24.05
Stearic acid	25.49
Tridecanoic acid	15.77
Tyrosine	29.25
